# Supplementary material
Source: PubMed Central journal article supplement (PMC3303931)
Supplement: NIHMS346770-supplement-01.pdf [file NIHMS346770-supplement-01.pdf]

**DEVELOPMENTAL NEUROTOXICITY OF ORGANOPHOSPHATES**  
**TARGETS CELL CYCLE AND APOPTOSIS, REVEALED BY**  
**TRANSCRIPTIONAL PROFILES IN VIVO AND IN VITRO**

Theodore A. Slotkin and Frederic J. Seidler  
Department of Pharmacology & Cancer Biology  
Duke University Medical Center  
Durham, North Carolina USA

SUPPLEMENTAL TABLES

Supplemental Table 1. Cell Cycle Genes In Vivo

| Gene          | Control     |             | CPF1           |              | DZN1           |              | DZN2 |             |              |
|---------------|-------------|-------------|----------------|--------------|----------------|--------------|------|-------------|--------------|
|               | brainstem   | forebrain   | brainstem      | forebrain    | brainstem      | forebrain    |      | brainstem   | forebrain    |
| <i>aatf</i>   | 1.02 ± 0.02 | 1.04 ± 0.05 | 0.96 ± 0.02    | 1.01 ± 0.02  | 1.03 ± 0.03    | 1.02 ± 0.02  |      | 0.95 ± 0.03 | 1.02 ± 0.04  |
| <i>acly</i>   | 0.95 ± 0.02 | 1.06 ± 0.02 | 0.97 ± 0.02    | 1.10 ± 0.02  | 0.87 ± 0.09    | 0.99 ± 0.10  | *    | 0.82 ± 0.11 | 0.91 ± 0.11  |
| <i>adcyp1</i> | 1.15 ± 0.09 | 0.86 ± 0.03 | 1.31 ± 0.02    | 0.92 ± 0.01  | 1.27 ± 0.05    | 0.82 ± 0.02  | *    | 1.30 ± 0.06 | 0.92 ± 0.01  |
| <i>ahr</i>    | 0.71 ± 0.07 | 1.01 ± 0.08 | 1.01 ± 0.06    | 1.13 ± 0.04  | 0.82 ± 0.08    | 0.97 ± 0.05  | *    | 0.93 ± 0.09 | 1.20 ± 0.08  |
| <i>ak1</i>    | 0.86 ± 0.04 | 0.89 ± 0.06 | 1.04 ± 0.02    | 1.10 ± 0.06  | * 1.05 ± 0.02  | 1.15 ± 0.06  |      | 0.92 ± 0.03 | 0.96 ± 0.11  |
| <i>akt1</i>   | 0.68 ± 0.03 | 1.58 ± 0.16 | 0.66 ± 0.05    | 1.35 ± 0.03  | 0.66 ± 0.04    | 1.44 ± 0.06  |      | 0.69 ± 0.02 | 1.39 ± 0.05  |
| <i>akt2</i>   | 0.86 ± 0.18 | 0.93 ± 0.18 | 0.62 ± 0.09    | 0.80 ± 0.11  | † 1.65 ± 0.23† | 0.84 ± 0.12  |      | 1.19 ± 0.26 | 0.92 ± 0.07  |
| <i>anxa1</i>  | 1.00 ± 0.04 | 0.98 ± 0.02 | 1.03 ± 0.04    | 0.98 ± 0.02  | 0.98 ± 0.01    | 1.01 ± 0.02  |      | 1.04 ± 0.03 | 1.01 ± 0.01  |
| <i>apbb1</i>  | 0.96 ± 0.02 | 1.09 ± 0.04 | 0.97 ± 0.01    | 1.04 ± 0.02  | 0.98 ± 0.02    | 1.06 ± 0.03  |      | 0.98 ± 0.02 | 1.05 ± 0.04  |
| <i>apc</i>    | 0.76 ± 0.02 | 1.34 ± 0.02 | 0.75 ± 0.03    | 1.25 ± 0.03  | † 0.78 ± 0.02  | 1.21 ± 0.02† | *    | 0.72 ± 0.01 | 1.27 ± 0.03  |
| <i>appbp1</i> | 1.06 ± 0.04 | 0.89 ± 0.01 | 1.10 ± 0.02    | 0.92 ± 0.03  | 1.08 ± 0.03    | 0.90 ± 0.03  |      | 1.10 ± 0.03 | 0.91 ± 0.01  |
| <i>araf1</i>  | 1.01 ± 0.02 | 1.15 ± 0.05 | * 0.98 ± 0.04  | 1.03 ± 0.04  | * 0.87 ± 0.05  | 0.95 ± 0.07  | *    | 0.94 ± 0.06 | 0.95 ± 0.10  |
| <i>atm</i>    | 1.10 ± 0.12 | 1.08 ± 0.04 | 0.89 ± 0.08    | 0.99 ± 0.08  | 1.12 ± 0.06    | 1.03 ± 0.04  | *    | 0.80 ± 0.05 | 0.86 ± 0.04  |
| <i>aurkb</i>  | 0.84 ± 0.06 | 0.92 ± 0.04 | 0.85 ± 0.16    | 0.96 ± 0.06  | * 1.07 ± 0.11  | 1.03 ± 0.08  | *    | 1.02 ± 0.19 | 1.12 ± 0.06  |
| <i>axin2</i>  | 1.18 ± 0.09 | 1.01 ± 0.07 | 1.01 ± 0.17    | 1.01 ± 0.04  | 1.07 ± 0.15    | 0.90 ± 0.04  |      | 0.99 ± 0.05 | 1.00 ± 0.05  |
| <i>bcl10</i>  | 0.95 ± 0.02 | 1.02 ± 0.02 | 0.94 ± 0.01    | 1.03 ± 0.03  | * 1.04 ± 0.04  | 1.05 ± 0.02  |      | 0.99 ± 0.03 | 1.06 ± 0.03  |
| <i>bin1</i>   | 0.94 ± 0.02 | 1.14 ± 0.06 | 0.95 ± 0.04    | 1.11 ± 0.05  | 0.94 ± 0.02    | 1.11 ± 0.02  |      | 0.94 ± 0.02 | 1.15 ± 0.05  |
| <i>bmyc</i>   | 0.95 ± 0.02 | 1.06 ± 0.08 | 0.97 ± 0.05    | 1.09 ± 0.05  | 0.98 ± 0.05    | 1.05 ± 0.05  |      | 0.93 ± 0.05 | 1.02 ± 0.04  |
| <i>brca1</i>  | 0.66 ± 0.10 | 0.81 ± 0.18 | 0.75 ± 0.15    | 0.77 ± 0.12  | * 1.04 ± 0.12  | 1.45 ± 0.23  | *    | 1.05 ± 0.07 | 1.42 ± 0.20  |
| <i>btc</i>    | 1.18 ± 0.23 | 1.02 ± 0.10 | 1.19 ± 0.11    | 0.85 ± 0.09  | 0.99 ± 0.13    | 0.86 ± 0.13  |      | 1.30 ± 0.24 | 0.98 ± 0.12  |
| <i>btg3</i>   | 1.13 ± 0.02 | 0.90 ± 0.02 | 1.12 ± 0.04    | 0.97 ± 0.02  | 1.09 ± 0.06    | 0.90 ± 0.03  | †    | 1.04 ± 0.02 | 0.94 ± 0.04  |
| <i>bzw1</i>   | 0.91 ± 0.02 | 1.12 ± 0.02 | * 0.87 ± 0.02  | 1.09 ± 0.02  | 0.89 ± 0.01    | 1.12 ± 0.02  |      | 0.90 ± 0.02 | 1.13 ± 0.02  |
| <i>calm1</i>  | 0.93 ± 0.03 | 1.16 ± 0.06 | 0.89 ± 0.03    | 1.05 ± 0.03  | * 0.90 ± 0.03  | 1.03 ± 0.01  |      | 0.88 ± 0.04 | 1.10 ± 0.04  |
| <i>calm2</i>  | 0.90 ± 0.02 | 1.20 ± 0.02 | 0.94 ± 0.01    | 1.13 ± 0.03  | † 0.97 ± 0.03  | 1.15 ± 0.03  |      | 0.94 ± 0.02 | 1.22 ± 0.01  |
| <i>calm3</i>  | 0.94 ± 0.02 | 1.02 ± 0.01 | † 0.95 ± 0.02  | 1.02 ± 0.01  | * 0.96 ± 0.01  | 1.07 ± 0.01  | *    | 0.99 ± 0.02 | 1.04 ± 0.01  |
| <i>camk2a</i> | 0.92 ± 0.06 | 1.20 ± 0.08 | 0.85 ± 0.01    | 1.10 ± 0.03  | 0.90 ± 0.02    | 1.09 ± 0.03  | *    | 0.86 ± 0.01 | 1.07 ± 0.04  |
| <i>camk2b</i> | 0.68 ± 0.03 | 1.49 ± 0.11 | 0.63 ± 0.03    | 1.34 ± 0.03  | 0.68 ± 0.03    | 1.42 ± 0.03  |      | 0.67 ± 0.02 | 1.47 ± 0.06  |
| <i>camk2d</i> | 1.03 ± 0.08 | 0.90 ± 0.04 | 1.08 ± 0.03    | 0.97 ± 0.07  | † 1.10 ± 0.06  | 0.75 ± 0.06† |      | 1.07 ± 0.07 | 0.89 ± 0.07  |
| <i>camk2g</i> | 1.08 ± 0.04 | 0.94 ± 0.05 | 1.09 ± 0.05    | 0.92 ± 0.04  | 1.11 ± 0.03    | 0.93 ± 0.02  |      | 1.06 ± 0.03 | 0.92 ± 0.03  |
| <i>casp3</i>  | 0.83 ± 0.03 | 1.35 ± 0.02 | 0.84 ± 0.04    | 1.39 ± 0.07  | 0.85 ± 0.04    | 1.25 ± 0.06  |      | 0.87 ± 0.06 | 1.26 ± 0.08  |
| <i>ccnb1</i>  | 1.19 ± 0.10 | 1.06 ± 0.12 | * 1.06 ± 0.05  | 0.91 ± 0.02  | 1.07 ± 0.06    | 0.98 ± 0.03  | *    | 1.02 ± 0.06 | 0.95 ± 0.04  |
| <i>ccnc</i>   | 1.08 ± 0.05 | 0.94 ± 0.04 | 1.07 ± 0.02    | 0.92 ± 0.03  | 1.05 ± 0.02    | 0.93 ± 0.03  |      | 1.07 ± 0.03 | 0.93 ± 0.02  |
| <i>ccnd1</i>  | 1.10 ± 0.06 | 0.99 ± 0.02 | 1.00 ± 0.03    | 0.97 ± 0.03  | 1.03 ± 0.03    | 0.99 ± 0.03  |      | 1.02 ± 0.02 | 0.97 ± 0.02  |
| <i>ccnd2</i>  | 0.73 ± 0.14 | 1.24 ± 0.14 | 0.59 ± 0.05    | 1.43 ± 0.17  | 0.64 ± 0.09    | 1.41 ± 0.10  |      | 0.62 ± 0.08 | 1.33 ± 0.14  |
| <i>ccnd3</i>  | 0.96 ± 0.04 | 1.24 ± 0.08 | 0.95 ± 0.02    | 1.08 ± 0.03  | * 0.94 ± 0.01  | 1.07 ± 0.04  | *    | 0.94 ± 0.01 | 1.03 ± 0.02  |
| <i>ccnf</i>   | 1.03 ± 0.03 | 1.15 ± 0.04 | * 0.91 ± 0.05  | 1.03 ± 0.04  | * 0.93 ± 0.03  | 0.99 ± 0.04  | *    | 0.94 ± 0.03 | 1.00 ± 0.07  |
| <i>ccng1</i>  | 1.15 ± 0.07 | 0.95 ± 0.08 | * 1.02 ± 0.02  | 0.79 ± 0.02  | * 1.07 ± 0.03  | 0.80 ± 0.01  | *    | 1.04 ± 0.04 | 0.81 ± 0.02  |
| <i>ccnh</i>   | 0.93 ± 0.01 | 1.11 ± 0.02 | 0.92 ± 0.01    | 1.11 ± 0.01  | 0.94 ± 0.01    | 1.11 ± 0.02  |      | 0.92 ± 0.01 | 1.11 ± 0.03  |
| <i>ccpg1</i>  | 1.04 ± 0.02 | 1.05 ± 0.03 | * 1.01 ± 0.02  | 1.00 ± 0.01  | * 0.95 ± 0.02  | 0.96 ± 0.02  | *    | 0.98 ± 0.03 | 1.01 ± 0.01  |
| <i>ccrk</i>   | 1.07 ± 0.05 | 0.97 ± 0.02 | 1.10 ± 0.05    | 0.98 ± 0.04  | 1.08 ± 0.03    | 0.98 ± 0.03  |      | 1.08 ± 0.03 | 0.99 ± 0.02  |
| <i>cdc10</i>  | 0.97 ± 0.04 | 1.09 ± 0.07 | 0.93 ± 0.03    | 1.14 ± 0.03  | 0.95 ± 0.02    | 1.13 ± 0.04  |      | 0.96 ± 0.03 | 1.14 ± 0.02  |
| <i>cdc14a</i> | 0.71 ± 0.15 | 4.21 ± 0.80 | *† 0.84 ± 0.11 | 1.26 ± 0.41† | *† 0.82 ± 0.12 | 1.52 ± 0.26† | *†   | 1.18 ± 0.29 | 1.07 ± 0.20† |
| <i>cdc14b</i> | 1.16 ± 0.11 | 0.92 ± 0.06 | 1.06 ± 0.03    | 0.92 ± 0.04  | † 0.85 ± 0.04† | 1.04 ± 0.12  |      | 1.21 ± 0.11 | 0.81 ± 0.04  |
| <i>cdc16</i>  | 0.98 ± 0.04 | 1.03 ± 0.02 | 0.98 ± 0.02    | 1.00 ± 0.01  | 0.96 ± 0.02    | 1.01 ± 0.04  |      | 0.98 ± 0.02 | 1.05 ± 0.02  |
| <i>cdc20</i>  | 1.04 ± 0.01 | 0.97 ± 0.02 | 1.03 ± 0.03    | 0.97 ± 0.02  | 1.07 ± 0.01    | 0.99 ± 0.01  |      | 1.02 ± 0.02 | 1.00 ± 0.02  |
| <i>cdc23</i>  | 1.21 ± 0.09 | 0.92 ± 0.04 | 1.22 ± 0.10    | 0.91 ± 0.03  | 1.23 ± 0.09    | 0.88 ± 0.04  |      | 1.20 ± 0.10 | 0.91 ± 0.05  |
| <i>cdc25a</i> | 1.01 ± 0.04 | 0.99 ± 0.07 | 0.92 ± 0.08    | 0.98 ± 0.12  | † 0.95 ± 0.06  | 1.22 ± 0.08† | †    | 0.86 ± 0.06 | 1.13 ± 0.13  |
| <i>cdc25b</i> | 0.95 ± 0.02 | 1.05 ± 0.05 | 0.91 ± 0.02    | 1.07 ± 0.04  | 0.91 ± 0.02    | 1.08 ± 0.02  |      | 0.97 ± 0.04 | 1.06 ± 0.02  |
| <i>cdc25c</i> | 0.76 ± 0.08 | 1.11 ± 0.14 | 1.11 ± 0.19    | 0.98 ± 0.11  | 1.11 ± 0.28    | 0.99 ± 0.08  |      | 1.02 ± 0.18 | 0.99 ± 0.03  |
| <i>cdc27</i>  | 0.98 ± 0.09 | 1.10 ± 0.07 | 0.88 ± 0.06    | 1.14 ± 0.10  | 0.98 ± 0.09    | 1.06 ± 0.08  |      | 0.67 ± 0.15 | 1.15 ± 0.09  |
| <i>cdc2a</i>  | 0.99 ± 0.02 | 0.96 ± 0.02 | 1.03 ± 0.01    | 0.98 ± 0.02  | 1.02 ± 0.03    | 0.99 ± 0.02  |      | 1.04 ± 0.03 | 0.96 ± 0.02  |
| <i>cdc211</i> | 0.87 ± 0.02 | 1.14 ± 0.04 | 0.86 ± 0.02    | 1.18 ± 0.04  | 0.86 ± 0.04    | 1.18 ± 0.04  |      | 0.91 ± 0.03 | 1.14 ± 0.03  |
| <i>cdc215</i> | 0.92 ± 0.03 | 1.14 ± 0.05 | 0.90 ± 0.03    | 1.18 ± 0.05  | 0.89 ± 0.02    | 1.18 ± 0.06  |      | 0.87 ± 0.02 | 1.16 ± 0.04  |
| <i>cdc34</i>  | 0.93 ± 0.01 | 1.09 ± 0.02 | † 0.96 ± 0.01  | 1.01 ± 0.01† | † 0.95 ± 0.02  | 1.03 ± 0.02† | †    | 0.97 ± 0.03 | 1.05 ± 0.02  |
| <i>cdc37</i>  | 0.87 ± 0.05 | 1.19 ± 0.07 | 0.85 ± 0.04    | 1.18 ± 0.04  | 0.88 ± 0.04    | 1.19 ± 0.07  |      | 0.83 ± 0.03 | 1.24 ± 0.09  |

| Supplemental Table 1 (continued) |             |             |    |              |              |    |              |             |    |              |              |
|----------------------------------|-------------|-------------|----|--------------|--------------|----|--------------|-------------|----|--------------|--------------|
| <i>cdc37l</i>                    | 1.02 ± 0.04 | 1.04 ± 0.02 |    | 1.01 ± 0.04  | 1.00 ± 0.05  |    | 1.00 ± 0.02  | 0.98 ± 0.03 |    | 1.02 ± 0.05  | 0.96 ± 0.01  |
| <i>cdc40</i>                     | 0.78 ± 0.13 | 1.24 ± 0.12 |    | 0.86 ± 0.11  | 1.26 ± 0.08  |    | 0.83 ± 0.09  | 1.19 ± 0.11 |    | 0.76 ± 0.12  | 1.05 ± 0.07  |
| <i>cdc42</i>                     | 1.00 ± 0.01 | 1.02 ± 0.02 |    | 1.00 ± 0.02  | 1.03 ± 0.02  |    | 1.00 ± 0.02  | 1.02 ± 0.01 |    | 0.98 ± 0.01  | 1.02 ± 0.03  |
| <i>cdc5l</i>                     | 0.90 ± 0.06 | 0.99 ± 0.03 | †  | 0.87 ± 0.04  | 1.15 ± 0.03† | *  | 0.92 ± 0.05  | 1.15 ± 0.03 | *  | 0.97 ± 0.06  | 1.19 ± 0.04  |
| <i>cdc6</i>                      | 0.98 ± 0.12 | 1.11 ± 0.06 |    | 0.79 ± 0.12  | 1.10 ± 0.07  |    | 0.89 ± 0.11  | 1.10 ± 0.11 |    | 0.93 ± 0.10  | 1.10 ± 0.07  |
| <i>cdc7</i>                      | 1.04 ± 0.06 | 1.16 ± 0.06 | *  | 0.88 ± 0.06  | 0.99 ± 0.07  | *  | 0.82 ± 0.04  | 1.07 ± 0.05 |    | 0.92 ± 0.04  | 1.11 ± 0.06  |
| <i>cdc911l</i>                   | 1.06 ± 0.04 | 0.99 ± 0.01 |    | 1.05 ± 0.04  | 0.94 ± 0.02  |    | 1.08 ± 0.04  | 0.98 ± 0.01 |    | 1.07 ± 0.05  | 0.96 ± 0.03  |
| <i>cdcal</i>                     | 0.95 ± 0.03 | 1.02 ± 0.02 |    | 0.94 ± 0.03  | 1.04 ± 0.01  |    | 0.90 ± 0.03  | 1.06 ± 0.03 |    | 0.94 ± 0.04  | 1.07 ± 0.02  |
| <i>cdca2</i>                     | 0.81 ± 0.07 | 1.00 ± 0.05 |    | 0.90 ± 0.13  | 1.15 ± 0.10  |    | 0.86 ± 0.04  | 1.20 ± 0.14 | *  | 0.97 ± 0.07  | 1.17 ± 0.14  |
| <i>cdca3</i>                     | 0.94 ± 0.02 | 1.03 ± 0.03 | †  | 1.00 ± 0.02  | 1.00 ± 0.01  | †  | 0.99 ± 0.01  | 1.00 ± 0.01 |    | 0.98 ± 0.04  | 1.00 ± 0.02  |
| <i>cdca7</i>                     | 0.77 ± 0.06 | 1.39 ± 0.08 |    | 0.74 ± 0.04  | 1.59 ± 0.10  |    | 0.64 ± 0.04  | 1.39 ± 0.03 |    | 0.74 ± 0.06  | 1.47 ± 0.07  |
| <i>cdk2</i>                      | 1.11 ± 0.05 | 0.98 ± 0.02 |    | 1.05 ± 0.03  | 0.98 ± 0.04  | *  | 1.01 ± 0.04  | 0.95 ± 0.01 |    | 1.10 ± 0.04  | 0.92 ± 0.04  |
| <i>cdk4</i>                      | 0.89 ± 0.02 | 1.16 ± 0.05 |    | 0.89 ± 0.03  | 1.09 ± 0.03  |    | 0.86 ± 0.02  | 1.10 ± 0.03 |    | 0.92 ± 0.02  | 1.15 ± 0.03  |
| <i>cdk5</i>                      | 0.85 ± 0.05 | 1.10 ± 0.05 |    | 0.89 ± 0.02  | 1.11 ± 0.04  |    | 0.91 ± 0.05  | 1.02 ± 0.02 |    | 0.86 ± 0.07  | 1.06 ± 0.04  |
| <i>cdk6</i>                      | 1.12 ± 0.17 | 0.83 ± 0.08 |    | 0.81 ± 0.06  | 0.89 ± 0.17  |    | 1.22 ± 0.08  | 0.86 ± 0.13 |    | 1.02 ± 0.12  | 0.98 ± 0.20  |
| <i>cdk7</i>                      | 0.97 ± 0.02 | 1.03 ± 0.04 |    | 0.97 ± 0.02  | 1.07 ± 0.04  |    | 0.98 ± 0.03  | 1.03 ± 0.02 |    | 0.95 ± 0.05  | 1.07 ± 0.05  |
| <i>cdkn1a</i>                    | 1.23 ± 0.14 | 0.86 ± 0.07 | †  | 0.94 ± 0.06† | 1.16 ± 0.09† |    | 1.17 ± 0.08  | 1.01 ± 0.14 | †  | 0.99 ± 0.07  | 0.92 ± 0.04  |
| <i>cdkn1b</i>                    | 0.87 ± 0.05 | 1.27 ± 0.04 |    | 0.84 ± 0.02  | 1.20 ± 0.05  |    | 0.92 ± 0.03  | 1.30 ± 0.02 |    | 0.82 ± 0.06  | 1.16 ± 0.05  |
| <i>cdkn1c</i>                    | 1.32 ± 0.13 | 0.82 ± 0.07 |    | 1.57 ± 0.10  | 0.82 ± 0.03  |    | 1.41 ± 0.09  | 0.84 ± 0.05 |    | 1.54 ± 0.13  | 0.85 ± 0.07  |
| <i>cdkn2a</i>                    | 1.10 ± 0.03 | 0.96 ± 0.02 | †  | 0.98 ± 0.04  | 0.99 ± 0.04  |    | 1.04 ± 0.02  | 0.91 ± 0.07 | *  | 1.03 ± 0.02  | 0.90 ± 0.02  |
| <i>cdkn2b</i>                    | 1.07 ± 0.13 | 1.13 ± 0.15 |    | 0.97 ± 0.16  | 0.78 ± 0.04  |    | 0.99 ± 0.12  | 1.17 ± 0.14 |    | 1.05 ± 0.08  | 0.87 ± 0.04  |
| <i>cdkn2c</i>                    | 0.88 ± 0.03 | 1.10 ± 0.10 | *  | 0.94 ± 0.02  | 1.22 ± 0.03  |    | 0.88 ± 0.02  | 1.20 ± 0.05 |    | 0.95 ± 0.02  | 1.18 ± 0.05  |
| <i>cgrefl</i>                    | 0.99 ± 0.02 | 1.12 ± 0.04 | *  | 0.91 ± 0.04  | 1.03 ± 0.07  | *  | 0.92 ± 0.03  | 1.08 ± 0.04 | *† | 0.98 ± 0.03  | 0.99 ± 0.03† |
| <i>cgrrfl</i>                    | 1.55 ± 0.07 | 0.91 ± 0.04 | *† | 1.32 ± 0.04† | 0.91 ± 0.01  | *† | 1.31 ± 0.05† | 0.89 ± 0.03 | *  | 1.38 ± 0.03  | 0.89 ± 0.02  |
| <i>chek1</i>                     | 0.99 ± 0.04 | 0.98 ± 0.08 |    | 1.04 ± 0.03  | 0.96 ± 0.07  | *  | 1.05 ± 0.05  | 0.99 ± 0.05 |    | 1.11 ± 0.06  | 0.96 ± 0.05  |
| <i>chek2</i>                     | 0.76 ± 0.09 | 1.15 ± 0.18 |    | 0.88 ± 0.15  | 1.21 ± 0.07  |    | 1.05 ± 0.12  | 0.98 ± 0.11 |    | 0.89 ± 0.06  | 1.41 ± 0.25  |
| <i>commd5</i>                    | 0.89 ± 0.06 | 1.03 ± 0.05 |    | 0.91 ± 0.04  | 1.07 ± 0.03  |    | 0.87 ± 0.04  | 1.10 ± 0.03 |    | 0.83 ± 0.02  | 1.06 ± 0.01  |
| <i>cort</i>                      | 0.66 ± 0.03 | 1.35 ± 0.02 |    | 0.72 ± 0.03  | 1.33 ± 0.06  |    | 0.68 ± 0.03  | 1.41 ± 0.05 |    | 0.69 ± 0.03  | 1.41 ± 0.03  |
| <i>crk</i>                       | 0.97 ± 0.06 | 1.23 ± 0.13 |    | 0.98 ± 0.06  | 1.02 ± 0.06  | *  | 0.93 ± 0.05  | 0.95 ± 0.08 | †  | 1.03 ± 0.02  | 0.99 ± 0.06† |
| <i>csflr</i>                     | 0.97 ± 0.02 | 0.90 ± 0.05 | *  | 1.04 ± 0.03  | 1.01 ± 0.03  | *  | 1.03 ± 0.01  | 1.01 ± 0.02 |    | 0.99 ± 0.02  | 0.98 ± 0.06  |
| <i>csnk1d</i>                    | 1.06 ± 0.03 | 1.00 ± 0.01 |    | 1.08 ± 0.03  | 0.95 ± 0.04  |    | 1.09 ± 0.05  | 0.90 ± 0.05 | *† | 1.05 ± 0.05  | 0.83 ± 0.01† |
| <i>cspg6</i>                     | 0.83 ± 0.03 | 1.20 ± 0.04 |    | 0.83 ± 0.03  | 1.16 ± 0.05  |    | 0.84 ± 0.03  | 1.21 ± 0.03 |    | 0.88 ± 0.05  | 1.21 ± 0.04  |
| <i>ctcf</i>                      | 0.97 ± 0.04 | 1.09 ± 0.02 |    | 0.91 ± 0.03  | 1.07 ± 0.01  |    | 0.92 ± 0.02  | 1.05 ± 0.03 |    | 0.95 ± 0.03  | 1.08 ± 0.03  |
| <i>cul5</i>                      | 0.97 ± 0.04 | 0.99 ± 0.10 |    | 0.98 ± 0.05  | 1.07 ± 0.05  |    | 0.99 ± 0.03  | 1.07 ± 0.06 |    | 0.92 ± 0.11  | 0.99 ± 0.07  |
| <i>cwfl19l1</i>                  | 0.81 ± 0.16 | 1.27 ± 0.17 |    | 0.79 ± 0.10  | 1.03 ± 0.12  | *  | 1.11 ± 0.12  | 2.40 ± 0.24 |    | 0.84 ± 0.06  | 1.05 ± 0.09  |
| <i>cwfl19l2</i>                  | 0.91 ± 0.05 | 0.96 ± 0.07 |    | 0.90 ± 0.05  | 0.99 ± 0.05  | *  | 0.94 ± 0.04  | 1.11 ± 0.03 | *  | 1.03 ± 0.08  | 1.07 ± 0.06  |
| <i>cxcl1</i>                     | 1.39 ± 0.17 | 1.26 ± 0.09 | *  | 0.92 ± 0.14  | 0.83 ± 0.12  | *  | 0.79 ± 0.09  | 0.94 ± 0.15 | *  | 0.72 ± 0.01  | 0.81 ± 0.08  |
| <i>d123</i>                      | 0.95 ± 0.01 | 1.03 ± 0.01 |    | 0.94 ± 0.01  | 1.03 ± 0.01  |    | 0.94 ± 0.01  | 1.03 ± 0.01 |    | 0.97 ± 0.04  | 1.04 ± 0.02  |
| <i>dcc</i>                       | 1.28 ± 0.10 | 0.87 ± 0.05 | †  | 1.02 ± 0.02† | 0.98 ± 0.05  |    | 1.28 ± 0.04  | 1.04 ± 0.11 | *† | 0.93 ± 0.11† | 0.85 ± 0.03  |
| <i>ddit3</i>                     | 1.64 ± 0.08 | 0.64 ± 0.02 |    | 1.58 ± 0.03  | 0.69 ± 0.03  |    | 1.49 ± 0.06  | 0.68 ± 0.04 |    | 1.51 ± 0.04  | 0.64 ± 0.02  |
| <i>ddx16</i>                     | 1.16 ± 0.06 | 1.01 ± 0.05 |    | 1.02 ± 0.05  | 0.96 ± 0.06  | *  | 0.98 ± 0.07  | 0.92 ± 0.06 |    | 1.09 ± 0.09  | 0.90 ± 0.05  |
| <i>dusp1</i>                     | 0.92 ± 0.05 | 1.10 ± 0.03 |    | 0.87 ± 0.04  | 1.12 ± 0.04  |    | 0.90 ± 0.06  | 1.10 ± 0.05 |    | 0.92 ± 0.03  | 1.02 ± 0.03  |
| <i>e2f3</i>                      | 1.06 ± 0.03 | 0.89 ± 0.03 |    | 1.05 ± 0.02  | 0.93 ± 0.01  | *  | 1.08 ± 0.04  | 0.97 ± 0.01 |    | 1.06 ± 0.03  | 0.94 ± 0.02  |
| <i>e2f5</i>                      | 1.14 ± 0.08 | 0.71 ± 0.10 |    | 1.39 ± 0.07  | 0.85 ± 0.10  |    | 1.29 ± 0.07  | 0.93 ± 0.03 |    | 1.28 ± 0.19  | 0.65 ± 0.11  |
| <i>egfr</i>                      | 0.96 ± 0.04 | 1.04 ± 0.01 |    | 0.97 ± 0.04  | 0.97 ± 0.02  |    | 0.97 ± 0.02  | 1.02 ± 0.03 |    | 0.96 ± 0.02  | 1.00 ± 0.03  |
| <i>elk1</i>                      | 0.95 ± 0.12 | 0.80 ± 0.13 |    | 0.96 ± 0.07  | 1.07 ± 0.09  | †  | 0.78 ± 0.06  | 1.07 ± 0.13 | *  | 1.58 ± 0.10  | 1.12 ± 0.16  |
| <i>erall</i>                     | 1.14 ± 0.04 | 1.14 ± 0.14 | *  | 1.01 ± 0.07  | 0.88 ± 0.04  |    | 1.05 ± 0.05  | 0.95 ± 0.02 | *  | 1.02 ± 0.11  | 0.93 ± 0.04  |
| <i>erbb2</i>                     | 0.94 ± 0.02 | 0.94 ± 0.02 | *† | 1.05 ± 0.01† | 0.97 ± 0.01  | *  | 1.07 ± 0.04  | 1.01 ± 0.01 | *  | 1.08 ± 0.03  | 1.00 ± 0.02  |
| <i>erbb3</i>                     | 0.97 ± 0.13 | 0.95 ± 0.02 |    | 0.97 ± 0.15  | 0.93 ± 0.07  |    | 0.97 ± 0.14  | 1.04 ± 0.15 | *  | 1.31 ± 0.17  | 1.26 ± 0.17  |
| <i>ereg</i>                      | 0.95 ± 0.06 | 0.96 ± 0.12 |    | 1.07 ± 0.07  | 1.15 ± 0.22  |    | 0.70 ± 0.16  | 0.96 ± 0.30 |    | 0.83 ± 0.13  | 1.04 ± 0.25  |
| <i>ets1</i>                      | 0.97 ± 0.04 | 1.05 ± 0.04 |    | 0.88 ± 0.01  | 1.06 ± 0.03  |    | 0.92 ± 0.02  | 1.08 ± 0.01 |    | 0.91 ± 0.01  | 1.07 ± 0.03  |
| <i>ets2</i>                      | 1.04 ± 0.05 | 0.97 ± 0.04 |    | 1.07 ± 0.07  | 1.02 ± 0.03  |    | 1.02 ± 0.05  | 0.99 ± 0.06 |    | 1.06 ± 0.06  | 0.91 ± 0.02  |
| <i>fbxo2</i>                     | 1.42 ± 0.06 | 0.70 ± 0.02 |    | 1.39 ± 0.05  | 0.68 ± 0.03  |    | 1.39 ± 0.05  | 0.71 ± 0.03 |    | 1.43 ± 0.05  | 0.70 ± 0.03  |
| <i>fgf1</i>                      | 0.98 ± 0.05 | 1.00 ± 0.04 |    | 0.80 ± 0.13  | 0.99 ± 0.05  |    | 0.96 ± 0.07  | 0.99 ± 0.11 |    | 1.09 ± 0.06  | 0.99 ± 0.03  |
| <i>fgf2</i>                      | 1.17 ± 0.09 | 1.02 ± 0.03 | *  | 0.92 ± 0.06  | 0.87 ± 0.03  | *† | 0.87 ± 0.04† | 1.02 ± 0.10 | *† | 0.61 ± 0.10† | 1.04 ± 0.03  |
| <i>fgf3</i>                      | 1.04 ± 0.09 | 0.87 ± 0.04 | *  | 1.20 ± 0.04  | 0.99 ± 0.05  | *  | 1.25 ± 0.13  | 0.96 ± 0.05 | *  | 1.30 ± 0.07  | 0.91 ± 0.05  |
| <i>fgf4</i>                      | 0.93 ± 0.13 | 0.81 ± 0.13 |    | 1.16 ± 0.25  | 1.13 ± 0.16  |    | 1.34 ± 0.14  | 0.88 ± 0.18 |    | 1.26 ± 0.28  | 1.17 ± 0.14  |
| <i>fgf5</i>                      | 1.17 ± 0.18 | 0.55 ± 0.03 | †  | 0.98 ± 0.12  | 1.00 ± 0.17† | *  | 1.41 ± 0.18  | 0.98 ± 0.26 | †  | 0.85 ± 0.15  | 1.20 ± 0.25† |

| Supplemental Table 1 (continued) |             |             |    |             |              |    |              |              |    |              |              |
|----------------------------------|-------------|-------------|----|-------------|--------------|----|--------------|--------------|----|--------------|--------------|
| <i>fgf7</i>                      | 0.82 ± 0.25 | 1.31 ± 0.32 |    | 0.68 ± 0.21 | 0.87 ± 0.32  |    | 0.92 ± 0.24  | 0.85 ± 0.21  |    | 0.89 ± 0.10  | 1.08 ± 0.12  |
| <i>fgf9</i>                      | 1.37 ± 0.08 | 0.81 ± 0.02 |    | 1.40 ± 0.06 | 0.85 ± 0.03  |    | 1.48 ± 0.02  | 0.84 ± 0.03  |    | 1.42 ± 0.07  | 0.80 ± 0.03  |
| <i>fgr</i>                       | 1.03 ± 0.13 | 0.88 ± 0.06 |    | 1.23 ± 0.11 | 0.87 ± 0.07  |    | 1.05 ± 0.04  | 0.96 ± 0.03  |    | 1.27 ± 0.14  | 0.87 ± 0.09  |
| <i>figf</i>                      | 0.99 ± 0.04 | 0.93 ± 0.02 |    | 0.97 ± 0.04 | 1.00 ± 0.04  | *  | 1.04 ± 0.04  | 1.12 ± 0.09  | *  | 1.14 ± 0.07  | 1.12 ± 0.07  |
| <i>fos</i>                       | 1.38 ± 0.09 | 1.07 ± 0.23 | *  | 0.90 ± 0.15 | 0.72 ± 0.09  |    | 1.52 ± 0.11  | 0.63 ± 0.15  |    | 0.93 ± 0.16  | 1.06 ± 0.20  |
| <i>foxg1</i>                     | 0.09 ± 0.03 | 1.93 ± 0.05 |    | 0.07 ± 0.01 | 1.97 ± 0.03  |    | 0.06 ± 0.01  | 1.98 ± 0.05  |    | 0.08 ± 0.02  | 2.03 ± 0.06  |
| <i>frap1</i>                     | 0.91 ± 0.04 | 1.12 ± 0.06 |    | 0.91 ± 0.02 | 1.02 ± 0.02  |    | 0.91 ± 0.03  | 1.08 ± 0.03  |    | 0.89 ± 0.06  | 1.05 ± 0.04  |
| <i>fyn</i>                       | 0.84 ± 0.04 | 1.14 ± 0.05 |    | 0.84 ± 0.06 | 1.14 ± 0.03  |    | 0.84 ± 0.03  | 1.11 ± 0.01  |    | 0.79 ± 0.03  | 1.11 ± 0.03  |
| <i>fzr1</i>                      | 0.77 ± 0.04 | 1.16 ± 0.03 |    | 0.87 ± 0.04 | 1.21 ± 0.07  |    | 0.89 ± 0.04  | 1.15 ± 0.10  | *† | 0.91 ± 0.04† | 1.15 ± 0.04  |
| <i>gadd45a</i>                   | 1.23 ± 0.04 | 0.86 ± 0.02 |    | 1.19 ± 0.03 | 0.83 ± 0.03  | †  | 1.10 ± 0.02† | 0.88 ± 0.02  |    | 1.15 ± 0.05  | 0.89 ± 0.03  |
| <i>gak</i>                       | 1.00 ± 0.02 | 1.14 ± 0.02 | *† | 0.98 ± 0.02 | 1.00 ± 0.01† | *† | 1.01 ± 0.03  | 0.99 ± 0.02† | *† | 0.97 ± 0.02  | 0.99 ± 0.02† |
| <i>gsk3b</i>                     | 0.84 ± 0.05 | 1.31 ± 0.10 |    | 0.79 ± 0.03 | 1.19 ± 0.07  |    | 0.87 ± 0.03  | 1.28 ± 0.06  |    | 0.81 ± 0.08  | 1.17 ± 0.05  |
| <i>gspt1</i>                     | 0.97 ± 0.02 | 1.06 ± 0.02 |    | 0.96 ± 0.02 | 1.02 ± 0.02  |    | 0.95 ± 0.03  | 1.04 ± 0.02  |    | 0.94 ± 0.02  | 1.05 ± 0.03  |
| <i>hdac3</i>                     | 0.96 ± 0.02 | 1.09 ± 0.03 |    | 0.94 ± 0.03 | 1.08 ± 0.03  |    | 0.93 ± 0.02  | 1.09 ± 0.03  |    | 0.93 ± 0.02  | 1.08 ± 0.02  |
| <i>hdac7a</i>                    | 1.02 ± 0.08 | 0.69 ± 0.07 | *  | 1.17 ± 0.14 | 0.92 ± 0.06  | *  | 1.31 ± 0.18  | 1.00 ± 0.10  | *† | 1.04 ± 0.13  | 1.18 ± 0.15† |
| <i>hirip5</i>                    | 0.97 ± 0.10 | 0.91 ± 0.09 | *  | 1.40 ± 0.20 | 1.03 ± 0.09  |    | 1.26 ± 0.13  | 0.87 ± 0.04  |    | 1.10 ± 0.09  | 0.93 ± 0.09  |
| <i>hspa8</i>                     | 0.95 ± 0.02 | 1.09 ± 0.02 | *  | 0.93 ± 0.02 | 1.04 ± 0.01  | *  | 0.93 ± 0.02  | 1.03 ± 0.01  |    | 0.96 ± 0.02  | 1.06 ± 0.02  |
| <i>id2</i>                       | 0.80 ± 0.04 | 1.41 ± 0.04 | *  | 0.66 ± 0.04 | 1.35 ± 0.07  | *  | 0.72 ± 0.02  | 1.29 ± 0.02  | *  | 0.73 ± 0.02  | 1.30 ± 0.09  |
| <i>igf2</i>                      | 1.19 ± 0.08 | 0.94 ± 0.02 |    | 1.24 ± 0.08 | 0.91 ± 0.07  |    | 1.07 ± 0.08  | 0.88 ± 0.02  |    | 1.31 ± 0.05  | 0.94 ± 0.02  |
| <i>il18</i>                      | 1.20 ± 0.11 | 0.87 ± 0.19 |    | 0.96 ± 0.12 | 0.90 ± 0.06  |    | 1.14 ± 0.06  | 0.89 ± 0.06  |    | 1.13 ± 0.05  | 0.83 ± 0.04  |
| <i>il1a</i>                      | 1.46 ± 0.19 | 0.78 ± 0.12 |    | 1.44 ± 0.15 | 0.88 ± 0.07  | †  | 0.99 ± 0.11  | 0.79 ± 0.05  | †  | 1.13 ± 0.08  | 0.97 ± 0.14  |
| <i>il1b</i>                      | 1.12 ± 0.06 | 0.86 ± 0.04 | *  | 1.51 ± 0.23 | 1.04 ± 0.04  | *  | 0.98 ± 0.04  | 0.81 ± 0.04  |    | 1.16 ± 0.10  | 0.87 ± 0.03  |
| <i>ilkap</i>                     | 0.98 ± 0.03 | 0.98 ± 0.04 |    | 1.00 ± 0.04 | 1.03 ± 0.03  |    | 1.00 ± 0.03  | 1.01 ± 0.02  |    | 0.97 ± 0.03  | 1.04 ± 0.01  |
| <i>inha</i>                      | 1.05 ± 0.03 | 0.94 ± 0.04 |    | 1.05 ± 0.03 | 0.91 ± 0.04  |    | 1.06 ± 0.05  | 0.92 ± 0.04  |    | 1.04 ± 0.04  | 0.93 ± 0.04  |
| <i>itgb1</i>                     | 0.98 ± 0.06 | 0.73 ± 0.08 |    | 1.00 ± 0.11 | 1.02 ± 0.13  |    | 0.98 ± 0.05  | 1.00 ± 0.11  |    | 1.00 ± 0.16  | 0.98 ± 0.14  |
| <i>jag2</i>                      | 0.93 ± 0.07 | 1.01 ± 0.09 |    | 0.92 ± 0.09 | 1.05 ± 0.04  |    | 0.96 ± 0.10  | 1.05 ± 0.03  |    | 0.86 ± 0.11  | 1.10 ± 0.07  |
| <i>jun</i>                       | 1.11 ± 0.06 | 1.00 ± 0.03 |    | 1.03 ± 0.03 | 1.00 ± 0.02  |    | 1.05 ± 0.03  | 0.96 ± 0.02  | *  | 0.95 ± 0.06  | 0.96 ± 0.01  |
| <i>junb</i>                      | 0.85 ± 0.14 | 0.95 ± 0.08 |    | 0.85 ± 0.05 | 1.28 ± 0.10  |    | 0.81 ± 0.09  | 1.29 ± 0.12  |    | 0.81 ± 0.08  | 1.27 ± 0.10  |
| <i>jund</i>                      | 0.97 ± 0.06 | 0.89 ± 0.07 | *  | 1.00 ± 0.01 | 1.02 ± 0.05  | *  | 1.02 ± 0.06  | 1.12 ± 0.06  |    | 1.04 ± 0.05  | 1.01 ± 0.10  |
| <i>kras2</i>                     | 0.89 ± 0.02 | 1.07 ± 0.08 | *  | 0.92 ± 0.01 | 1.29 ± 0.02  |    | 0.95 ± 0.05  | 1.18 ± 0.05  | *† | 0.91 ± 0.02  | 1.28 ± 0.03† |
| <i>loc288698</i>                 | 1.28 ± 0.03 | 0.64 ± 0.01 |    | 1.28 ± 0.04 | 0.63 ± 0.02  |    | 1.32 ± 0.03  | 0.64 ± 0.01  | *  | 1.32 ± 0.04  | 0.68 ± 0.01  |
| <i>lyn</i>                       | 1.11 ± 0.04 | 0.96 ± 0.03 |    | 1.06 ± 0.04 | 0.98 ± 0.04  | *  | 0.98 ± 0.03  | 0.95 ± 0.02  |    | 1.07 ± 0.05  | 0.93 ± 0.01  |
| <i>maf</i>                       | 1.08 ± 0.10 | 1.07 ± 0.09 |    | 1.01 ± 0.06 | 1.04 ± 0.09  |    | 1.11 ± 0.10  | 1.08 ± 0.07  |    | 0.98 ± 0.14  | 1.01 ± 0.08  |
| <i>mafK</i>                      | 0.73 ± 0.07 | 1.39 ± 0.21 |    | 0.82 ± 0.10 | 1.31 ± 0.09  |    | 0.75 ± 0.07  | 1.24 ± 0.10  |    | 0.61 ± 0.05  | 1.25 ± 0.15  |
| <i>map3k8</i>                    | 1.29 ± 0.15 | 0.88 ± 0.04 |    | 1.10 ± 0.10 | 0.85 ± 0.06  |    | 1.22 ± 0.10  | 0.91 ± 0.08  |    | 1.24 ± 0.12  | 0.81 ± 0.03  |
| <i>mapk1</i>                     | 0.99 ± 0.03 | 1.07 ± 0.02 |    | 0.96 ± 0.02 | 1.07 ± 0.03  |    | 0.98 ± 0.02  | 1.04 ± 0.04  |    | 0.93 ± 0.04  | 1.05 ± 0.04  |
| <i>mapk12</i>                    | 1.07 ± 0.10 | 0.86 ± 0.04 | †  | 1.00 ± 0.06 | 1.02 ± 0.02† |    | 1.08 ± 0.09  | 0.77 ± 0.11  |    | 1.05 ± 0.02  | 0.87 ± 0.06  |
| <i>mapk13</i>                    | 1.37 ± 0.21 | 0.52 ± 0.10 | *  | 1.94 ± 0.22 | 0.73 ± 0.12  |    | 1.28 ± 0.10  | 0.74 ± 0.19  |    | 1.38 ± 0.42  | 0.99 ± 0.17  |
| <i>mapk3</i>                     | 0.87 ± 0.03 | 1.31 ± 0.20 |    | 0.94 ± 0.07 | 1.18 ± 0.11  |    | 0.95 ± 0.03  | 1.19 ± 0.12  |    | 0.87 ± 0.08  | 1.19 ± 0.16  |
| <i>mapk4</i>                     | 0.96 ± 0.03 | 1.04 ± 0.04 |    | 1.00 ± 0.04 | 1.11 ± 0.05  |    | 1.01 ± 0.06  | 1.07 ± 0.05  |    | 0.95 ± 0.04  | 1.01 ± 0.05  |
| <i>mapk6</i>                     | 1.19 ± 0.04 | 0.84 ± 0.03 |    | 1.24 ± 0.03 | 0.82 ± 0.02  |    | 1.23 ± 0.01  | 0.82 ± 0.02  |    | 1.21 ± 0.04  | 0.83 ± 0.02  |
| <i>mas1</i>                      | 0.62 ± 0.03 | 1.41 ± 0.04 |    | 0.59 ± 0.03 | 1.51 ± 0.04  |    | 0.62 ± 0.03  | 1.44 ± 0.05  |    | 0.63 ± 0.04  | 1.40 ± 0.04  |
| <i>mcm5</i>                      | 1.16 ± 0.15 | 1.19 ± 0.14 |    | 1.01 ± 0.06 | 0.99 ± 0.03  | *  | 0.90 ± 0.04  | 1.08 ± 0.04  | *  | 0.98 ± 0.02  | 0.98 ± 0.04  |
| <i>mcmd6</i>                     | 0.90 ± 0.04 | 1.27 ± 0.07 |    | 0.88 ± 0.04 | 1.27 ± 0.04  |    | 0.83 ± 0.03  | 1.23 ± 0.06  |    | 0.85 ± 0.04  | 1.26 ± 0.08  |
| <i>mdk</i>                       | 1.04 ± 0.03 | 0.99 ± 0.01 | *  | 1.01 ± 0.02 | 0.93 ± 0.02  |    | 1.02 ± 0.04  | 0.97 ± 0.03  |    | 1.04 ± 0.02  | 0.99 ± 0.02  |
| <i>merik</i>                     | 0.76 ± 0.10 | 1.11 ± 0.07 |    | 0.87 ± 0.12 | 1.26 ± 0.07  |    | 0.71 ± 0.08  | 1.20 ± 0.12  | †  | 0.96 ± 0.08  | 0.98 ± 0.08  |
| <i>met</i>                       | 0.91 ± 0.07 | 1.10 ± 0.10 |    | 0.81 ± 0.13 | 0.99 ± 0.05  |    | 1.03 ± 0.09  | 1.14 ± 0.12  |    | 0.79 ± 0.07  | 1.12 ± 0.09  |
| <i>mid1</i>                      | 1.22 ± 0.14 | 1.30 ± 0.33 | *  | 0.52 ± 0.22 | 1.05 ± 0.16  | *  | 0.84 ± 0.15  | 0.79 ± 0.10  |    | 0.93 ± 0.19  | 1.14 ± 0.16  |
| <i>mnat1</i>                     | 1.07 ± 0.05 | 0.95 ± 0.04 |    | 1.02 ± 0.04 | 0.96 ± 0.03  |    | 1.04 ± 0.01  | 1.01 ± 0.02  |    | 1.06 ± 0.05  | 0.97 ± 0.02  |
| <i>mos</i>                       | 0.95 ± 0.09 | 0.89 ± 0.10 | *  | 1.09 ± 0.10 | 1.28 ± 0.19  | †  | 0.82 ± 0.09  | 1.30 ± 0.10† |    | 0.90 ± 0.12  | 1.06 ± 0.17  |
| <i>mre11a</i>                    | 0.91 ± 0.10 | 0.90 ± 0.05 | *  | 1.10 ± 0.15 | 1.37 ± 0.18  |    | 1.04 ± 0.13  | 1.03 ± 0.15  |    | 1.21 ± 0.18  | 0.94 ± 0.05  |
| <i>msh2</i>                      | 0.98 ± 0.03 | 1.03 ± 0.03 |    | 0.94 ± 0.02 | 1.05 ± 0.01  | *  | 0.87 ± 0.03  | 1.01 ± 0.02  |    | 0.93 ± 0.03  | 1.04 ± 0.02  |
| <i>myc</i>                       | 0.79 ± 0.04 | 1.19 ± 0.01 |    | 0.81 ± 0.03 | 1.22 ± 0.03  |    | 0.82 ± 0.04  | 1.18 ± 0.04  |    | 0.81 ± 0.04  | 1.18 ± 0.04  |
| <i>mycl1</i>                     | 0.86 ± 0.07 | 1.05 ± 0.05 |    | 1.11 ± 0.19 | 1.12 ± 0.13  |    | 0.91 ± 0.04  | 1.03 ± 0.06  | *  | 0.97 ± 0.03  | 1.14 ± 0.03  |
| <i>mycn</i>                      | 0.58 ± 0.05 | 1.37 ± 0.06 |    | 0.53 ± 0.02 | 1.46 ± 0.10  |    | 0.57 ± 0.07  | 1.29 ± 0.07  |    | 0.57 ± 0.04  | 1.51 ± 0.11  |
| <i>mycs</i>                      | 0.97 ± 0.03 | 1.03 ± 0.05 |    | 1.03 ± 0.05 | 1.03 ± 0.05  |    | 1.00 ± 0.02  | 0.98 ± 0.02  |    | 1.04 ± 0.03  | 0.98 ± 0.03  |
| <i>n-myc</i>                     | 0.73 ± 0.04 | 1.29 ± 0.05 |    | 0.69 ± 0.04 | 1.37 ± 0.02  |    | 0.69 ± 0.01  | 1.32 ± 0.02  |    | 0.75 ± 0.03  | 1.30 ± 0.01  |
| <i>nbl1</i>                      | 0.98 ± 0.03 | 1.02 ± 0.05 |    | 1.02 ± 0.04 | 1.02 ± 0.05  |    | 0.97 ± 0.03  | 1.01 ± 0.03  |    | 1.03 ± 0.02  | 1.04 ± 0.04  |

| Supplemental Table 1 (continued) |             |             |    |              |              |    |              |             |    |             |              |
|----------------------------------|-------------|-------------|----|--------------|--------------|----|--------------|-------------|----|-------------|--------------|
| <i>nbn</i>                       | 1.08 ± 0.03 | 0.91 ± 0.02 |    | 1.05 ± 0.02  | 0.93 ± 0.02  |    | 1.08 ± 0.02  | 0.92 ± 0.02 |    | 1.08 ± 0.03 | 0.95 ± 0.02  |
| <i>nedd4a</i>                    | 0.95 ± 0.02 | 0.99 ± 0.04 |    | 0.99 ± 0.02  | 1.01 ± 0.04  |    | 1.07 ± 0.07  | 0.99 ± 0.03 |    | 1.00 ± 0.01 | 1.02 ± 0.03  |
| <i>nedd8</i>                     | 1.00 ± 0.02 | 1.00 ± 0.02 |    | 1.01 ± 0.02  | 1.00 ± 0.01  |    | 0.99 ± 0.01  | 1.02 ± 0.02 |    | 1.00 ± 0.03 | 1.01 ± 0.01  |
| <i>nek2</i>                      | 0.84 ± 0.07 | 1.13 ± 0.07 |    | 0.96 ± 0.05  | 1.16 ± 0.10  |    | 0.94 ± 0.05  | 1.10 ± 0.04 |    | 0.92 ± 0.09 | 1.04 ± 0.10  |
| <i>nf2</i>                       | 1.08 ± 0.07 | 0.93 ± 0.12 |    | 1.03 ± 0.11  | 0.97 ± 0.04  |    | 0.95 ± 0.16  | 1.07 ± 0.06 | †  | 1.01 ± 0.05 | 1.33 ± 0.18  |
| <i>notch2</i>                    | 1.06 ± 0.07 | 0.93 ± 0.03 |    | 0.95 ± 0.06  | 1.01 ± 0.09  |    | 0.96 ± 0.05  | 0.99 ± 0.03 |    | 1.04 ± 0.03 | 1.01 ± 0.10  |
| <i>npm1</i>                      | 1.07 ± 0.02 | 0.92 ± 0.03 |    | 1.03 ± 0.01  | 0.93 ± 0.02  |    | 1.06 ± 0.02  | 0.93 ± 0.01 |    | 1.13 ± 0.03 | 0.92 ± 0.02  |
| <i>nr2f6</i>                     | 1.01 ± 0.02 | 1.01 ± 0.03 |    | 0.98 ± 0.03  | 1.05 ± 0.03  |    | 0.98 ± 0.02  | 1.03 ± 0.03 |    | 0.96 ± 0.02 | 1.03 ± 0.02  |
| <i>nras</i>                      | 0.82 ± 0.02 | 1.20 ± 0.05 |    | 0.84 ± 0.02  | 1.29 ± 0.05  |    | 0.83 ± 0.02  | 1.29 ± 0.05 |    | 0.85 ± 0.04 | 1.25 ± 0.04  |
| <i>nucks</i>                     | 0.77 ± 0.03 | 1.28 ± 0.10 |    | 0.77 ± 0.03  | 1.29 ± 0.05  |    | 0.80 ± 0.05  | 1.26 ± 0.04 |    | 0.76 ± 0.04 | 1.26 ± 0.06  |
| <i>pal31</i>                     | 0.98 ± 0.07 | 1.06 ± 0.17 |    | 0.89 ± 0.06  | 1.29 ± 0.15  |    | 0.95 ± 0.11  | 1.21 ± 0.13 |    | 0.91 ± 0.13 | 1.15 ± 0.16  |
| <i>par3</i>                      | 1.02 ± 0.07 | 1.05 ± 0.07 |    | 0.98 ± 0.03  | 1.11 ± 0.06  |    | 0.90 ± 0.02  | 1.07 ± 0.05 |    | 0.93 ± 0.04 | 1.07 ± 0.08  |
| <i>park2</i>                     | 0.98 ± 0.02 | 1.11 ± 0.04 | †  | 1.03 ± 0.03  | 1.02 ± 0.03  | *  | 0.89 ± 0.05  | 1.02 ± 0.03 | *† | 0.96 ± 0.03 | 0.97 ± 0.03† |
| <i>pbe1f</i>                     | 0.97 ± 0.02 | 1.03 ± 0.03 |    | 0.99 ± 0.03  | 1.00 ± 0.04  |    | 1.00 ± 0.01  | 1.03 ± 0.01 |    | 1.03 ± 0.05 | 0.99 ± 0.02  |
| <i>pcml</i>                      | 0.95 ± 0.01 | 1.02 ± 0.03 |    | 0.95 ± 0.02  | 1.03 ± 0.03  |    | 0.95 ± 0.02  | 1.02 ± 0.02 |    | 0.98 ± 0.03 | 0.98 ± 0.03  |
| <i>pdgfa</i>                     | 0.98 ± 0.04 | 1.17 ± 0.07 |    | 0.90 ± 0.05  | 1.09 ± 0.05  |    | 0.90 ± 0.03  | 1.11 ± 0.05 |    | 0.94 ± 0.02 | 1.10 ± 0.05  |
| <i>pdgfb</i>                     | 1.11 ± 0.25 | 1.25 ± 0.14 |    | 0.94 ± 0.05  | 0.89 ± 0.12  |    | 0.94 ± 0.09  | 0.86 ± 0.09 | *  | 0.97 ± 0.03 | 0.73 ± 0.09  |
| <i>pdgfc</i>                     | 1.01 ± 0.30 | 0.83 ± 0.14 |    | 1.01 ± 0.15  | 1.14 ± 0.34  |    | 0.96 ± 0.14  | 0.86 ± 0.16 | *  | 1.00 ± 0.08 | 1.55 ± 0.27  |
| <i>pgf</i>                       | 1.04 ± 0.03 | 0.90 ± 0.09 |    | 0.98 ± 0.03  | 0.97 ± 0.14  |    | 1.02 ± 0.03  | 1.02 ± 0.08 |    | 0.92 ± 0.03 | 0.90 ± 0.10  |
| <i>pglyrp1</i>                   | 0.89 ± 0.03 | 1.05 ± 0.02 | †  | 0.95 ± 0.01  | 1.03 ± 0.02  | *† | 0.97 ± 0.01† | 1.04 ± 0.01 | *  | 0.96 ± 0.02 | 1.07 ± 0.02  |
| <i>pkcbpb15</i>                  | 1.00 ± 0.04 | 1.18 ± 0.08 |    | 0.97 ± 0.02  | 1.11 ± 0.07  |    | 0.95 ± 0.05  | 1.10 ± 0.05 |    | 1.00 ± 0.02 | 1.12 ± 0.08  |
| <i>pkd1</i>                      | 0.93 ± 0.02 | 1.00 ± 0.05 |    | 0.95 ± 0.02  | 1.00 ± 0.01  | *  | 0.97 ± 0.02  | 1.12 ± 0.04 | *  | 1.01 ± 0.02 | 1.06 ± 0.03  |
| <i>plagl1</i>                    | 1.00 ± 0.04 | 0.98 ± 0.08 |    | 1.06 ± 0.06  | 0.91 ± 0.06  |    | 1.04 ± 0.08  | 0.95 ± 0.10 |    | 1.02 ± 0.04 | 0.95 ± 0.06  |
| <i>plcb1</i>                     | 0.91 ± 0.13 | 1.09 ± 0.26 |    | 0.86 ± 0.12  | 1.41 ± 0.26  |    | 0.75 ± 0.09  | 1.53 ± 0.23 |    | 0.78 ± 0.20 | 1.15 ± 0.30  |
| <i>plk1</i>                      | 0.90 ± 0.06 | 1.18 ± 0.07 |    | 0.89 ± 0.03  | 1.02 ± 0.06  |    | 0.91 ± 0.07  | 1.09 ± 0.05 |    | 0.94 ± 0.05 | 1.05 ± 0.05  |
| <i>plk2</i>                      | 0.48 ± 0.02 | 1.68 ± 0.08 |    | 0.48 ± 0.02  | 1.68 ± 0.04  |    | 0.49 ± 0.03  | 1.67 ± 0.04 |    | 0.48 ± 0.02 | 1.71 ± 0.09  |
| <i>plk3</i>                      | 1.09 ± 0.06 | 1.05 ± 0.06 |    | 1.08 ± 0.06  | 0.95 ± 0.02  |    | 1.07 ± 0.13  | 0.91 ± 0.01 |    | 1.10 ± 0.04 | 0.92 ± 0.04  |
| <i>pmp22</i>                     | 1.43 ± 0.02 | 0.81 ± 0.04 |    | 1.41 ± 0.04  | 0.78 ± 0.03  |    | 1.43 ± 0.06  | 0.74 ± 0.01 |    | 1.45 ± 0.04 | 0.77 ± 0.04  |
| <i>ppm1g</i>                     | 0.77 ± 0.01 | 1.32 ± 0.08 |    | 0.74 ± 0.03  | 1.26 ± 0.02  |    | 0.72 ± 0.02  | 1.28 ± 0.02 |    | 0.75 ± 0.02 | 1.27 ± 0.02  |
| <i>ppp2ca</i>                    | 0.93 ± 0.03 | 1.08 ± 0.03 |    | 0.94 ± 0.02  | 1.05 ± 0.01  |    | 0.91 ± 0.02  | 1.07 ± 0.02 |    | 0.91 ± 0.04 | 1.08 ± 0.03  |
| <i>ppp3ca</i>                    | 0.81 ± 0.02 | 1.09 ± 0.04 | *† | 0.81 ± 0.02  | 1.23 ± 0.03† | *  | 0.88 ± 0.05  | 1.24 ± 0.04 |    | 0.82 ± 0.03 | 1.22 ± 0.06  |
| <i>ppp6c</i>                     | 1.12 ± 0.04 | 0.90 ± 0.04 |    | 1.09 ± 0.03  | 0.98 ± 0.04  |    | 1.07 ± 0.04  | 0.95 ± 0.04 | †  | 1.00 ± 0.03 | 0.93 ± 0.04  |
| <i>prok1</i>                     | 0.94 ± 0.04 | 1.00 ± 0.03 | *  | 1.06 ± 0.03  | 1.09 ± 0.03  |    | 0.97 ± 0.02  | 0.99 ± 0.04 | *  | 0.97 ± 0.02 | 1.10 ± 0.02  |
| <i>psmd1</i>                     | 1.02 ± 0.01 | 1.02 ± 0.04 |    | 1.01 ± 0.02  | 0.96 ± 0.02  |    | 1.02 ± 0.03  | 0.97 ± 0.03 |    | 1.02 ± 0.04 | 0.97 ± 0.03  |
| <i>pten</i>                      | 0.86 ± 0.02 | 1.11 ± 0.07 |    | 0.83 ± 0.03  | 1.16 ± 0.05  |    | 0.93 ± 0.08  | 1.18 ± 0.03 |    | 0.80 ± 0.10 | 1.16 ± 0.07  |
| <i>ptgds</i>                     | 1.31 ± 0.10 | 0.99 ± 0.08 |    | 1.48 ± 0.17  | 0.89 ± 0.03  | *  | 1.10 ± 0.10  | 0.81 ± 0.07 |    | 1.29 ± 0.13 | 0.83 ± 0.07  |
| <i>ptgs2</i>                     | 1.04 ± 0.05 | 1.03 ± 0.10 |    | 0.88 ± 0.02  | 0.99 ± 0.08  |    | 1.20 ± 0.12  | 0.98 ± 0.09 |    | 1.19 ± 0.16 | 1.28 ± 0.21  |
| <i>ptn</i>                       | 1.10 ± 0.03 | 0.86 ± 0.05 |    | 1.09 ± 0.03  | 0.90 ± 0.04  |    | 1.13 ± 0.04  | 0.86 ± 0.05 |    | 1.17 ± 0.03 | 0.93 ± 0.07  |
| <i>pttg1</i>                     | 1.08 ± 0.07 | 1.02 ± 0.05 |    | 0.95 ± 0.04  | 0.99 ± 0.05  |    | 1.01 ± 0.04  | 1.05 ± 0.03 |    | 0.97 ± 0.05 | 0.98 ± 0.06  |
| <i>rad50</i>                     | 0.80 ± 0.08 | 1.11 ± 0.05 |    | 0.95 ± 0.08  | 1.07 ± 0.06  | †  | 1.01 ± 0.07  | 1.05 ± 0.08 |    | 0.85 ± 0.03 | 1.05 ± 0.05  |
| <i>rad9</i>                      | 0.91 ± 0.03 | 1.06 ± 0.06 | †  | 1.05 ± 0.03† | 1.04 ± 0.05  |    | 0.98 ± 0.05  | 1.05 ± 0.05 |    | 0.93 ± 0.03 | 0.98 ± 0.03  |
| <i>raf1</i>                      | 0.83 ± 0.02 | 1.13 ± 0.02 |    | 0.88 ± 0.03  | 1.14 ± 0.03  |    | 0.85 ± 0.02  | 1.12 ± 0.01 |    | 0.86 ± 0.03 | 1.16 ± 0.02  |
| <i>ran</i>                       | 1.06 ± 0.03 | 0.95 ± 0.03 |    | 1.04 ± 0.02  | 0.95 ± 0.03  |    | 1.04 ± 0.01  | 0.96 ± 0.02 |    | 1.04 ± 0.02 | 0.96 ± 0.01  |
| <i>rb1</i>                       | 0.99 ± 0.02 | 0.99 ± 0.02 |    | 1.03 ± 0.03  | 0.99 ± 0.05  | *  | 1.06 ± 0.02  | 1.02 ± 0.01 |    | 0.99 ± 0.03 | 1.00 ± 0.03  |
| <i>rb12</i>                      | 0.97 ± 0.02 | 0.98 ± 0.05 |    | 0.97 ± 0.02  | 1.02 ± 0.04  |    | 1.00 ± 0.02  | 1.00 ± 0.03 |    | 0.95 ± 0.04 | 0.99 ± 0.04  |
| <i>ret</i>                       | 1.13 ± 0.03 | 1.04 ± 0.08 | *  | 1.03 ± 0.06  | 0.90 ± 0.05  |    | 1.07 ± 0.05  | 0.93 ± 0.05 |    | 1.02 ± 0.06 | 1.04 ± 0.05  |
| <i>rgs2</i>                      | 0.87 ± 0.04 | 1.18 ± 0.04 |    | 0.87 ± 0.03  | 1.22 ± 0.05  |    | 0.83 ± 0.04  | 1.20 ± 0.04 |    | 0.88 ± 0.04 | 1.20 ± 0.07  |
| <i>ros1</i>                      | 1.04 ± 0.11 | 1.00 ± 0.10 |    | 1.08 ± 0.11  | 0.93 ± 0.07  |    | 1.19 ± 0.12  | 0.95 ± 0.07 |    | 1.07 ± 0.10 | 1.01 ± 0.07  |
| <i>rps4x</i>                     | 0.96 ± 0.01 | 1.04 ± 0.03 |    | 0.97 ± 0.02  | 1.05 ± 0.02  |    | 0.98 ± 0.01  | 1.05 ± 0.02 |    | 0.97 ± 0.03 | 1.05 ± 0.03  |
| <i>s100a6</i>                    | 1.26 ± 0.07 | 0.94 ± 0.04 | *  | 1.12 ± 0.04  | 0.88 ± 0.05  | *  | 1.09 ± 0.04  | 0.91 ± 0.03 | *  | 1.07 ± 0.05 | 0.83 ± 0.03  |
| <i>sfrs5</i>                     | 0.92 ± 0.05 | 1.02 ± 0.07 |    | 0.94 ± 0.02  | 1.17 ± 0.07  | *  | 0.97 ± 0.03  | 1.16 ± 0.04 | *  | 1.01 ± 0.04 | 1.18 ± 0.09  |
| <i>siah2</i>                     | 0.89 ± 0.05 | 1.12 ± 0.06 |    | 0.86 ± 0.07  | 1.01 ± 0.01  |    | 0.98 ± 0.06  | 1.04 ± 0.02 |    | 0.89 ± 0.02 | 1.03 ± 0.01  |
| <i>sirt2</i>                     | 0.89 ± 0.05 | 1.12 ± 0.10 |    | 0.92 ± 0.08  | 1.06 ± 0.07  |    | 0.88 ± 0.05  | 1.15 ± 0.07 |    | 0.90 ± 0.04 | 1.11 ± 0.05  |
| <i>slc12a4</i>                   | 1.07 ± 0.05 | 1.05 ± 0.06 |    | 1.01 ± 0.06  | 0.99 ± 0.02  | *  | 0.95 ± 0.04  | 0.95 ± 0.02 |    | 1.06 ± 0.05 | 0.98 ± 0.04  |
| <i>snai1</i>                     | 0.97 ± 0.01 | 1.09 ± 0.03 |    | 0.97 ± 0.01  | 1.07 ± 0.01  |    | 0.94 ± 0.01  | 1.07 ± 0.02 |    | 0.95 ± 0.02 | 1.06 ± 0.02  |
| <i>socs1</i>                     | 1.02 ± 0.05 | 1.06 ± 0.04 |    | 1.02 ± 0.04  | 0.96 ± 0.04  |    | 0.95 ± 0.02  | 1.03 ± 0.05 |    | 1.00 ± 0.07 | 0.97 ± 0.04  |
| <i>spag5</i>                     | 1.11 ± 0.05 | 1.00 ± 0.06 |    | 1.03 ± 0.05  | 0.97 ± 0.03  |    | 1.03 ± 0.04  | 0.95 ± 0.03 |    | 1.17 ± 0.06 | 0.93 ± 0.02  |
| <i>src</i>                       | 0.89 ± 0.06 | 1.05 ± 0.03 |    | 0.94 ± 0.04  | 1.07 ± 0.04  |    | 0.96 ± 0.04  | 1.08 ± 0.03 |    | 0.88 ± 0.02 | 1.08 ± 0.03  |

|               |             |             |    |             |              |    |             |              |    |             |              |
|---------------|-------------|-------------|----|-------------|--------------|----|-------------|--------------|----|-------------|--------------|
| <i>stag3</i>  | 1.10 ± 0.04 | 0.85 ± 0.06 |    | 1.16 ± 0.12 | 0.86 ± 0.06  |    | 1.07 ± 0.08 | 0.87 ± 0.06  |    | 1.17 ± 0.09 | 0.93 ± 0.03  |
| <i>stk6</i>   | 0.96 ± 0.03 | 1.21 ± 0.09 | *  | 0.80 ± 0.04 | 1.02 ± 0.05  |    | 0.88 ± 0.10 | 1.08 ± 0.05  |    | 0.92 ± 0.08 | 1.13 ± 0.08  |
| <i>tacc1a</i> | 0.99 ± 0.03 | 0.95 ± 0.05 |    | 1.05 ± 0.03 | 0.96 ± 0.03  |    | 1.04 ± 0.04 | 1.00 ± 0.03  |    | 1.02 ± 0.03 | 1.02 ± 0.04  |
| <i>tcfl9</i>  | 0.85 ± 0.03 | 1.09 ± 0.05 |    | 0.87 ± 0.02 | 1.14 ± 0.03  |    | 0.87 ± 0.01 | 1.13 ± 0.02  |    | 0.88 ± 0.02 | 1.13 ± 0.02  |
| <i>tgfa</i>   | 1.00 ± 0.03 | 1.07 ± 0.04 |    | 0.97 ± 0.02 | 1.06 ± 0.02  |    | 1.04 ± 0.06 | 1.03 ± 0.02  | *  | 0.91 ± 0.04 | 1.00 ± 0.01  |
| <i>tgfb1</i>  | 0.99 ± 0.05 | 1.01 ± 0.05 | *  | 1.16 ± 0.06 | 1.05 ± 0.05  |    | 0.99 ± 0.05 | 0.96 ± 0.05  |    | 0.92 ± 0.06 | 0.92 ± 0.04  |
| <i>tgfb2</i>  | 0.87 ± 0.02 | 1.30 ± 0.07 |    | 0.88 ± 0.05 | 1.37 ± 0.05  |    | 0.89 ± 0.04 | 1.18 ± 0.05  |    | 0.79 ± 0.02 | 1.29 ± 0.04  |
| <i>tgfb3</i>  | 0.77 ± 0.06 | 1.32 ± 0.13 |    | 0.85 ± 0.06 | 1.20 ± 0.06  | †  | 0.90 ± 0.04 | 1.10 ± 0.05  |    | 0.76 ± 0.05 | 1.14 ± 0.09  |
| <i>thpo</i>   | 0.87 ± 0.08 | 0.97 ± 0.05 |    | 0.94 ± 0.04 | 1.02 ± 0.03  |    | 0.86 ± 0.08 | 1.04 ± 0.05  | *  | 0.98 ± 0.06 | 1.12 ± 0.04  |
| <i>thra</i>   | 0.64 ± 0.03 | 1.91 ± 0.17 | †  | 0.65 ± 0.04 | 1.52 ± 0.04† | †  | 0.66 ± 0.02 | 1.52 ± 0.06† | †  | 0.66 ± 0.03 | 1.51 ± 0.05† |
| <i>tp53</i>   | 0.93 ± 0.03 | 1.20 ± 0.04 | *† | 0.93 ± 0.02 | 1.03 ± 0.03† | *† | 0.99 ± 0.03 | 0.97 ± 0.01† | †  | 1.08 ± 0.08 | 1.10 ± 0.03  |
| <i>trp63</i>  | 0.83 ± 0.09 | 1.05 ± 0.10 |    | 1.02 ± 0.06 | 0.96 ± 0.09  | †  | 1.06 ± 0.07 | 0.92 ± 0.05  | †  | 1.03 ± 0.07 | 0.89 ± 0.08  |
| <i>tsc1</i>   | 0.88 ± 0.08 | 1.01 ± 0.06 |    | 1.00 ± 0.10 | 1.10 ± 0.05  |    | 0.97 ± 0.09 | 0.92 ± 0.06  |    | 0.93 ± 0.07 | 1.07 ± 0.08  |
| <i>tsc2</i>   | 0.87 ± 0.01 | 1.18 ± 0.09 |    | 0.87 ± 0.04 | 1.04 ± 0.04  |    | 0.89 ± 0.05 | 1.07 ± 0.02  |    | 0.89 ± 0.03 | 1.06 ± 0.02  |
| <i>ube1c</i>  | 0.99 ± 0.03 | 0.97 ± 0.05 |    | 0.97 ± 0.03 | 1.04 ± 0.01  |    | 0.99 ± 0.01 | 1.04 ± 0.01  |    | 0.97 ± 0.04 | 1.04 ± 0.02  |
| <i>uchl1</i>  | 0.94 ± 0.05 | 1.03 ± 0.09 |    | 1.04 ± 0.04 | 0.98 ± 0.05  |    | 1.03 ± 0.03 | 1.00 ± 0.05  |    | 1.02 ± 0.03 | 1.01 ± 0.06  |
| <i>uchl3</i>  | 1.12 ± 0.02 | 0.88 ± 0.02 |    | 1.14 ± 0.03 | 0.90 ± 0.02  |    | 1.13 ± 0.03 | 0.91 ± 0.02  |    | 1.14 ± 0.02 | 0.88 ± 0.01  |
| <i>vav1</i>   | 0.92 ± 0.11 | 0.98 ± 0.16 |    | 1.03 ± 0.08 | 1.01 ± 0.14  |    | 1.16 ± 0.16 | 1.11 ± 0.15  |    | 1.00 ± 0.14 | 0.73 ± 0.11  |
| <i>vegf</i>   | 0.95 ± 0.03 | 1.02 ± 0.02 |    | 0.93 ± 0.02 | 1.04 ± 0.02  |    | 0.95 ± 0.02 | 1.04 ± 0.02  |    | 0.99 ± 0.01 | 1.05 ± 0.03  |
| <i>vegfb</i>  | 1.23 ± 0.03 | 1.03 ± 0.06 | *  | 1.09 ± 0.02 | 0.93 ± 0.02  | *  | 1.12 ± 0.04 | 0.92 ± 0.03  | *  | 1.04 ± 0.11 | 0.89 ± 0.02  |
| <i>vegfc</i>  | 1.00 ± 0.02 | 1.13 ± 0.04 |    | 0.96 ± 0.02 | 1.07 ± 0.03  | *  | 0.96 ± 0.02 | 1.02 ± 0.02  | *† | 0.97 ± 0.02 | 1.00 ± 0.01† |
| <i>vhl</i>    | 1.04 ± 0.02 | 1.00 ± 0.02 |    | 1.04 ± 0.02 | 0.98 ± 0.01  |    | 1.02 ± 0.04 | 0.96 ± 0.02  |    | 1.07 ± 0.04 | 0.99 ± 0.02  |
| <i>wt1</i>    | 0.86 ± 0.13 | 0.81 ± 0.17 | *  | 1.05 ± 0.17 | 1.60 ± 0.07  |    | 0.87 ± 0.11 | 0.88 ± 0.11  | *† | 0.92 ± 0.07 | 1.46 ± 0.11† |

Normalized expression ratios are given as mean ± SE obtained from five animals in each group, with the sample from each animal run on a separate array. CPF1 = 1 mg/kg chlorpyrifos; DZN1 = 1 mg/kg diazinon; DZN2 = 2 mg/kg diazinon. Several of the values reported in this table have appeared in previous studies of other gene groupings [2,7-9].

\*Significant main treatment effect in two-factor ANOVA (treatment, region).

†Interaction of treatment × region; then, † denotes significant treatment effect for a given region.

#### Global statistical analysis of Table 1: ANOVA factors of treatment, gene, region<sup>§</sup>

All treatments: treatment × gene  $p < 0.0001$ ; treatment × gene × region,  $p < 0.0001$

brainstem: treatment × gene,  $p < 0.0001$

forebrain: treatment × gene,  $p < 0.0001$

Control vs. CPF1: treatment × gene,  $p < 0.0001$ ; treatment × gene × region,  $p < 0.002$

brainstem: treatment × gene,  $p < 0.001$

forebrain: treatment × gene,  $p < 0.0001$

Control vs. DZN1: treatment × gene,  $p < 0.0001$ ; treatment × gene × region,  $p < 0.002$

brainstem: treatment × gene,  $p < 0.0001$

forebrain: treatment × gene,  $p < 0.0001$

Control vs. DZN2: treatment × gene,  $p < 0.0001$ ; treatment × gene × region,  $p < 0.0001$

brainstem: treatment × gene,  $p < 0.0004$

forebrain: treatment × gene,  $p < 0.0001$

<sup>§</sup>results shown include only treatment effects and interactions of treatment with other variables

Supplemental Table 2. Apoptosis Genes In Vivo

| Gene           | Control     |             | CPF1 |              | DZN1        |   | DZN2        |             |   |              |              |
|----------------|-------------|-------------|------|--------------|-------------|---|-------------|-------------|---|--------------|--------------|
|                | brainstem   | forebrain   |      | brainstem    | forebrain   |   | brainstem   | forebrain   |   | brainstem    | forebrain    |
| <i>aatf</i>    | 1.02 ± 0.02 | 1.04 ± 0.05 |      | 0.96 ± 0.02  | 1.01 ± 0.02 |   | 1.03 ± 0.03 | 1.02 ± 0.02 |   | 0.95 ± 0.03  | 1.02 ± 0.04  |
| <i>aatk</i>    | 0.90 ± 0.07 | 0.82 ± 0.06 | *    | 1.00 ± 0.08  | 1.10 ± 0.09 | * | 1.16 ± 0.08 | 1.05 ± 0.08 | * | 1.03 ± 0.09  | 1.00 ± 0.07  |
| <i>accn1</i>   | 0.98 ± 0.06 | 1.02 ± 0.05 |      | 1.00 ± 0.03  | 1.01 ± 0.02 |   | 1.02 ± 0.03 | 1.01 ± 0.03 |   | 0.96 ± 0.03  | 1.01 ± 0.04  |
| <i>adam17</i>  | 1.12 ± 0.07 | 1.08 ± 0.07 | *    | 0.91 ± 0.03  | 0.95 ± 0.04 |   | 1.04 ± 0.04 | 1.00 ± 0.04 |   | 1.08 ± 0.09  | 0.98 ± 0.09  |
| <i>ahr</i>     | 0.71 ± 0.07 | 1.01 ± 0.08 |      | 1.01 ± 0.06  | 1.13 ± 0.04 |   | 0.82 ± 0.08 | 0.97 ± 0.05 | * | 0.93 ± 0.09  | 1.20 ± 0.08  |
| <i>aip1l</i>   | 1.00 ± 0.04 | 0.94 ± 0.04 |      | 1.04 ± 0.03  | 1.00 ± 0.04 |   | 1.08 ± 0.04 | 0.98 ± 0.03 |   | 0.99 ± 0.01  | 0.99 ± 0.01  |
| <i>akt1</i>    | 0.68 ± 0.03 | 1.58 ± 0.16 |      | 0.66 ± 0.05  | 1.35 ± 0.03 |   | 0.66 ± 0.04 | 1.44 ± 0.06 |   | 0.69 ± 0.02  | 1.39 ± 0.05  |
| <i>alox15</i>  | 1.08 ± 0.05 | 0.96 ± 0.05 |      | 1.09 ± 0.08  | 0.97 ± 0.06 |   | 1.00 ± 0.08 | 0.93 ± 0.12 |   | 0.98 ± 0.07  | 0.87 ± 0.05  |
| <i>amid</i>    | 1.12 ± 0.05 | 0.95 ± 0.07 |      | 1.13 ± 0.09  | 0.99 ± 0.03 |   | 1.01 ± 0.08 | 1.02 ± 0.08 |   | 1.01 ± 0.06  | 1.00 ± 0.04  |
| <i>amigo2</i>  | 1.08 ± 0.03 | 0.92 ± 0.04 | *    | 1.03 ± 0.01  | 0.82 ± 0.02 |   | 1.04 ± 0.04 | 0.86 ± 0.01 |   | 1.11 ± 0.05  | 0.90 ± 0.05  |
| <i>apaf1</i>   | 0.92 ± 0.03 | 1.08 ± 0.02 |      | 0.98 ± 0.02  | 1.09 ± 0.05 |   | 0.92 ± 0.02 | 1.05 ± 0.02 |   | 0.96 ± 0.02  | 1.05 ± 0.03  |
| <i>apbb2</i>   | 0.94 ± 0.06 | 1.17 ± 0.08 |      | 0.85 ± 0.04  | 1.13 ± 0.06 |   | 0.90 ± 0.03 | 1.10 ± 0.03 |   | 0.92 ± 0.04  | 1.10 ± 0.07  |
| <i>apbb3</i>   | 0.87 ± 0.06 | 1.16 ± 0.07 |      | 0.85 ± 0.02  | 1.11 ± 0.04 | * | 0.79 ± 0.01 | 1.04 ± 0.04 |   | 0.92 ± 0.06  | 1.13 ± 0.04  |
| <i>api2</i>    | 0.87 ± 0.03 | 1.10 ± 0.04 |      | 0.90 ± 0.03  | 1.09 ± 0.04 |   | 0.90 ± 0.03 | 1.11 ± 0.03 | * | 0.93 ± 0.05  | 1.20 ± 0.02  |
| <i>api5</i>    | 0.88 ± 0.03 | 1.06 ± 0.06 |      | 0.91 ± 0.03  | 1.07 ± 0.05 |   | 0.95 ± 0.05 | 1.06 ± 0.04 |   | 0.92 ± 0.03  | 1.09 ± 0.04  |
| <i>apl1</i>    | 0.79 ± 0.04 | 1.31 ± 0.14 |      | 0.86 ± 0.04  | 1.25 ± 0.06 |   | 0.86 ± 0.02 | 1.21 ± 0.04 |   | 0.86 ± 0.03  | 1.24 ± 0.07  |
| <i>apoe</i>    | 1.23 ± 0.04 | 0.80 ± 0.07 | *    | 1.10 ± 0.06  | 0.72 ± 0.02 |   | 1.16 ± 0.04 | 0.70 ± 0.01 | * | 1.17 ± 0.06  | 0.67 ± 0.02  |
| <i>app</i>     | 1.04 ± 0.03 | 0.95 ± 0.04 |      | 1.06 ± 0.05  | 0.94 ± 0.03 |   | 1.05 ± 0.03 | 0.93 ± 0.02 |   | 1.06 ± 0.01  | 0.95 ± 0.03  |
| <i>appbp1</i>  | 1.06 ± 0.04 | 0.89 ± 0.01 |      | 1.10 ± 0.02  | 0.92 ± 0.03 |   | 1.08 ± 0.03 | 0.90 ± 0.03 |   | 1.10 ± 0.03  | 0.91 ± 0.01  |
| <i>atm</i>     | 1.10 ± 0.12 | 1.08 ± 0.04 |      | 0.89 ± 0.08  | 0.99 ± 0.08 |   | 1.12 ± 0.06 | 1.03 ± 0.04 | * | 0.80 ± 0.05  | 0.86 ± 0.04  |
| <i>aven</i>    | 1.06 ± 0.01 | 1.04 ± 0.03 | *    | 1.02 ± 0.02  | 0.99 ± 0.02 | * | 0.96 ± 0.03 | 1.00 ± 0.01 | * | 0.98 ± 0.03  | 0.96 ± 0.03  |
| <i>axud1</i>   | 1.06 ± 0.07 | 1.04 ± 0.07 | †    | 1.17 ± 0.02  | 0.91 ± 0.03 |   | 1.06 ± 0.08 | 0.98 ± 0.05 |   | 1.06 ± 0.03  | 0.93 ± 0.04  |
| <i>bad</i>     | 0.88 ± 0.02 | 1.15 ± 0.05 |      | 0.92 ± 0.02  | 1.11 ± 0.05 |   | 0.87 ± 0.02 | 1.09 ± 0.03 |   | 0.95 ± 0.03  | 1.10 ± 0.02  |
| <i>bat3</i>    | 0.85 ± 0.02 | 1.42 ± 0.10 |      | 0.85 ± 0.05  | 1.22 ± 0.04 |   | 0.83 ± 0.03 | 1.25 ± 0.02 | * | 0.82 ± 0.03  | 1.24 ± 0.04  |
| <i>bax</i>     | 0.92 ± 0.01 | 1.10 ± 0.03 |      | 0.94 ± 0.01  | 1.07 ± 0.02 |   | 0.91 ± 0.02 | 1.05 ± 0.02 | * | 0.88 ± 0.03  | 1.02 ± 0.01  |
| <i>bbc3</i>    | 0.87 ± 0.06 | 1.10 ± 0.02 |      | 0.89 ± 0.03  | 1.13 ± 0.03 |   | 0.88 ± 0.02 | 1.10 ± 0.02 |   | 0.90 ± 0.03  | 1.16 ± 0.07  |
| <i>bcl10</i>   | 0.95 ± 0.02 | 1.02 ± 0.02 |      | 0.94 ± 0.01  | 1.03 ± 0.03 | * | 1.04 ± 0.04 | 1.05 ± 0.02 |   | 0.99 ± 0.03  | 1.06 ± 0.03  |
| <i>bcl2</i>    | 0.96 ± 0.04 | 0.99 ± 0.05 |      | 1.03 ± 0.02  | 1.01 ± 0.07 |   | 0.94 ± 0.03 | 1.00 ± 0.05 |   | 0.99 ± 0.03  | 1.06 ± 0.01  |
| <i>bcl2a1</i>  | 1.14 ± 0.08 | 0.92 ± 0.05 |      | 1.20 ± 0.03  | 0.84 ± 0.03 |   | 1.21 ± 0.11 | 0.98 ± 0.07 |   | 1.14 ± 0.08  | 0.81 ± 0.07  |
| <i>bcl2l1</i>  | 1.14 ± 0.09 | 1.12 ± 0.04 | *    | 0.96 ± 0.07  | 0.95 ± 0.06 | * | 0.96 ± 0.04 | 1.04 ± 0.09 | * | 1.02 ± 0.04  | 1.00 ± 0.07  |
| <i>bcl2l10</i> | 0.98 ± 0.01 | 1.00 ± 0.02 | †    | 1.03 ± 0.01† | 0.98 ± 0.02 |   | 1.02 ± 0.02 | 0.99 ± 0.01 |   | 0.99 ± 0.01  | 1.00 ± 0.03  |
| <i>bcl2l11</i> | 0.95 ± 0.12 | 1.04 ± 0.15 |      | 1.06 ± 0.18  | 1.27 ± 0.15 |   | 0.78 ± 0.10 | 1.14 ± 0.16 |   | 0.67 ± 0.07  | 1.11 ± 0.14  |
| <i>bcl2l13</i> | 0.94 ± 0.06 | 1.05 ± 0.04 |      | 0.97 ± 0.03  | 1.09 ± 0.04 |   | 0.90 ± 0.05 | 1.19 ± 0.07 |   | 0.99 ± 0.05  | 1.09 ± 0.08  |
| <i>bdnf</i>    | 1.56 ± 0.09 | 0.78 ± 0.04 |      | 1.57 ± 0.09  | 0.79 ± 0.04 |   | 1.48 ± 0.10 | 0.78 ± 0.06 |   | 1.52 ± 0.06  | 0.75 ± 0.03  |
| <i>bfar</i>    | 1.01 ± 0.06 | 0.94 ± 0.02 |      | 1.01 ± 0.07  | 1.00 ± 0.06 | * | 1.07 ± 0.03 | 1.04 ± 0.06 |   | 0.96 ± 0.06  | 0.99 ± 0.05  |
| <i>bid</i>     | 0.89 ± 0.04 | 1.18 ± 0.04 |      | 1.00 ± 0.11  | 1.08 ± 0.04 |   | 0.99 ± 0.06 | 1.08 ± 0.08 |   | 0.88 ± 0.07  | 1.11 ± 0.05  |
| <i>bid3</i>    | 1.00 ± 0.03 | 0.97 ± 0.05 |      | 1.06 ± 0.03  | 0.96 ± 0.04 |   | 1.03 ± 0.05 | 0.96 ± 0.02 |   | 1.04 ± 0.04  | 0.96 ± 0.01  |
| <i>biklk</i>   | 1.10 ± 0.03 | 0.92 ± 0.07 |      | 1.03 ± 0.05  | 0.94 ± 0.03 |   | 1.04 ± 0.03 | 0.86 ± 0.01 |   | 0.96 ± 0.06  | 0.91 ± 0.04  |
| <i>birc1b</i>  | 1.28 ± 0.10 | 1.05 ± 0.19 | *    | 1.07 ± 0.08  | 0.66 ± 0.10 | * | 0.90 ± 0.07 | 0.84 ± 0.10 | * | 1.11 ± 0.17  | 0.83 ± 0.08  |
| <i>birc3</i>   | 1.16 ± 0.10 | 0.89 ± 0.06 | *    | 1.39 ± 0.04  | 1.03 ± 0.04 | * | 0.82 ± 0.15 | 0.82 ± 0.08 |   | 1.20 ± 0.18  | 0.90 ± 0.11  |
| <i>birc4</i>   | 0.96 ± 0.02 | 0.94 ± 0.09 | *    | 1.20 ± 0.08  | 0.95 ± 0.04 |   | 1.23 ± 0.10 | 1.03 ± 0.06 |   | 1.02 ± 0.11  | 1.01 ± 0.11  |
| <i>birc5</i>   | 1.12 ± 0.06 | 0.93 ± 0.04 |      | 1.07 ± 0.04  | 0.91 ± 0.05 |   | 1.09 ± 0.04 | 0.93 ± 0.02 |   | 1.15 ± 0.05  | 0.93 ± 0.04  |
| <i>bmf</i>     | 1.17 ± 0.06 | 0.99 ± 0.07 |      | 1.02 ± 0.06  | 0.90 ± 0.10 | * | 1.14 ± 0.08 | 0.82 ± 0.04 | † | 1.26 ± 0.12  | 0.82 ± 0.04† |
| <i>bnip1</i>   | 1.05 ± 0.05 | 0.95 ± 0.02 |      | 1.06 ± 0.05  | 1.03 ± 0.02 |   | 1.07 ± 0.06 | 0.96 ± 0.02 |   | 1.02 ± 0.03  | 0.96 ± 0.03  |
| <i>bnip3</i>   | 1.21 ± 0.04 | 0.79 ± 0.04 |      | 1.26 ± 0.02  | 0.80 ± 0.03 |   | 1.22 ± 0.03 | 0.81 ± 0.02 |   | 1.23 ± 0.06  | 0.81 ± 0.03  |
| <i>bok</i>     | 0.84 ± 0.07 | 1.00 ± 0.05 |      | 0.88 ± 0.05  | 0.99 ± 0.07 | * | 0.96 ± 0.04 | 1.09 ± 0.01 |   | 0.96 ± 0.04  | 1.03 ± 0.01  |
| <i>brca1</i>   | 0.66 ± 0.10 | 0.81 ± 0.18 |      | 0.75 ± 0.15  | 0.77 ± 0.12 | * | 1.04 ± 0.12 | 1.45 ± 0.23 | * | 1.05 ± 0.07  | 1.42 ± 0.20  |
| <i>btbd14b</i> | 0.97 ± 0.19 | 1.30 ± 0.09 |      | 0.67 ± 0.12  | 1.13 ± 0.20 |   | 0.94 ± 0.09 | 1.05 ± 0.28 |   | 0.85 ± 0.12  | 1.05 ± 0.14  |
| <i>btg1</i>    | 0.77 ± 0.03 | 1.11 ± 0.04 |      | 0.76 ± 0.02  | 1.11 ± 0.04 |   | 0.78 ± 0.03 | 1.11 ± 0.03 |   | 0.76 ± 0.04  | 1.10 ± 0.02  |
| <i>c9</i>      | 1.00 ± 0.07 | 0.96 ± 0.05 |      | 1.04 ± 0.05  | 0.92 ± 0.02 |   | 1.10 ± 0.04 | 0.96 ± 0.03 |   | 0.98 ± 0.02  | 1.00 ± 0.02  |
| <i>casp1</i>   | 1.22 ± 0.08 | 0.89 ± 0.09 |      | 1.31 ± 0.05  | 0.76 ± 0.09 |   | 1.01 ± 0.09 | 0.86 ± 0.07 |   | 1.13 ± 0.10  | 0.76 ± 0.05  |
| <i>casp12</i>  | 1.04 ± 0.04 | 0.90 ± 0.02 | †    | 1.17 ± 0.04† | 0.89 ± 0.02 | * | 1.09 ± 0.05 | 1.01 ± 0.05 | † | 1.20 ± 0.06† | 0.85 ± 0.02  |
| <i>casp2</i>   | 0.83 ± 0.02 | 1.07 ± 0.03 |      | 0.85 ± 0.03  | 1.08 ± 0.01 |   | 0.85 ± 0.02 | 1.05 ± 0.02 |   | 0.85 ± 0.02  | 1.05 ± 0.02  |
| <i>casp3</i>   | 0.83 ± 0.03 | 1.35 ± 0.02 |      | 0.84 ± 0.04  | 1.39 ± 0.07 |   | 0.85 ± 0.04 | 1.25 ± 0.06 |   | 0.87 ± 0.06  | 1.26 ± 0.08  |
| <i>casp4</i>   | 1.39 ± 0.04 | 0.82 ± 0.04 |      | 1.32 ± 0.04  | 0.84 ± 0.03 | * | 1.16 ± 0.05 | 0.76 ± 0.04 |   | 1.28 ± 0.04  | 0.79 ± 0.03  |

| Supplemental Table 2 (continued) |             |             |   |              |              |    |              |              |    |              |              |
|----------------------------------|-------------|-------------|---|--------------|--------------|----|--------------|--------------|----|--------------|--------------|
| <i>casp6</i>                     | 1.35 ± 0.12 | 0.88 ± 0.03 |   | 1.20 ± 0.06  | 0.87 ± 0.04  |    | 1.22 ± 0.05  | 0.88 ± 0.03  |    | 1.29 ± 0.07  | 0.86 ± 0.01  |
| <i>casp7</i>                     | 1.25 ± 0.04 | 0.82 ± 0.02 |   | 1.25 ± 0.04  | 0.75 ± 0.02  |    | 1.25 ± 0.04  | 0.79 ± 0.02  |    | 1.27 ± 0.05  | 0.78 ± 0.02  |
| <i>casp8</i>                     | 1.34 ± 0.21 | 0.89 ± 0.09 |   | 0.94 ± 0.07  | 0.93 ± 0.08  |    | 1.05 ± 0.08  | 0.89 ± 0.06  |    | 1.24 ± 0.17  | 0.89 ± 0.10  |
| <i>casp9</i>                     | 0.84 ± 0.01 | 1.01 ± 0.03 | † | 1.04 ± 0.02† | 0.87 ± 0.09  | †  | 1.02 ± 0.05† | 0.97 ± 0.02  | †  | 1.07 ± 0.02† | 0.90 ± 0.04  |
| <i>cbl27</i>                     | 0.95 ± 0.04 | 1.01 ± 0.02 |   | 0.92 ± 0.02  | 1.02 ± 0.03  |    | 0.98 ± 0.04  | 1.04 ± 0.01  |    | 0.93 ± 0.04  | 1.04 ± 0.02  |
| <i>cd2</i>                       | 1.00 ± 0.13 | 1.49 ± 0.17 |   | 1.01 ± 0.16  | 1.10 ± 0.15  | *† | 0.95 ± 0.03  | 0.70 ± 0.12† |    | 0.80 ± 0.11  | 1.20 ± 0.12  |
| <i>cd28</i>                      | 1.35 ± 0.29 | 0.83 ± 0.19 |   | 0.90 ± 0.11  | 0.66 ± 0.11  |    | 0.97 ± 0.06  | 1.21 ± 0.29  |    | 0.97 ± 0.19  | 1.14 ± 0.19  |
| <i>cd51</i>                      | 1.12 ± 0.19 | 0.90 ± 0.17 |   | 1.27 ± 0.31  | 1.21 ± 0.18  |    | 0.73 ± 0.17  | 1.12 ± 0.21  |    | 0.87 ± 0.13  | 1.02 ± 0.10  |
| <i>cdkn1a</i>                    | 1.23 ± 0.14 | 0.86 ± 0.07 | † | 0.94 ± 0.06† | 1.16 ± 0.09† |    | 1.17 ± 0.08  | 1.01 ± 0.14  | †  | 0.99 ± 0.07  | 0.92 ± 0.04  |
| <i>cebpb</i>                     | 0.98 ± 0.15 | 0.92 ± 0.20 |   | 1.02 ± 0.22  | 0.94 ± 0.11  |    | 1.09 ± 0.17  | 1.07 ± 0.09  |    | 1.03 ± 0.19  | 1.00 ± 0.11  |
| <i>cfar</i>                      | 1.00 ± 0.03 | 1.07 ± 0.03 | * | 0.89 ± 0.03  | 1.00 ± 0.02  |    | 0.97 ± 0.03  | 1.09 ± 0.02  | *  | 0.93 ± 0.01  | 1.02 ± 0.03  |
| <i>cipar1</i>                    | 1.39 ± 0.02 | 0.74 ± 0.03 |   | 1.34 ± 0.06  | 0.78 ± 0.04  | †  | 1.26 ± 0.02† | 0.80 ± 0.02  | †  | 1.29 ± 0.04  | 0.81 ± 0.04  |
| <i>col18a1</i>                   | 1.01 ± 0.01 | 1.04 ± 0.03 |   | 1.00 ± 0.04  | 0.98 ± 0.01  | *  | 0.96 ± 0.02  | 0.97 ± 0.02  |    | 1.01 ± 0.02  | 0.96 ± 0.05  |
| <i>creb1</i>                     | 1.01 ± 0.07 | 1.19 ± 0.07 |   | 0.94 ± 0.03  | 1.10 ± 0.06  | *  | 0.79 ± 0.04  | 1.10 ± 0.04  | *  | 0.78 ± 0.03  | 1.06 ± 0.06  |
| <i>cse11</i>                     | 1.04 ± 0.04 | 0.92 ± 0.04 |   | 1.04 ± 0.02  | 0.96 ± 0.04  |    | 1.03 ± 0.03  | 0.88 ± 0.02  |    | 1.08 ± 0.03  | 0.94 ± 0.04  |
| <i>ctsb</i>                      | 1.26 ± 0.05 | 0.94 ± 0.02 |   | 1.25 ± 0.06  | 0.94 ± 0.01  |    | 1.22 ± 0.03  | 0.94 ± 0.02  | *  | 1.17 ± 0.04  | 0.91 ± 0.02  |
| <i>cugbp2</i>                    | 0.64 ± 0.01 | 1.38 ± 0.06 |   | 0.64 ± 0.03  | 1.36 ± 0.02  | †  | 0.69 ± 0.01† | 1.35 ± 0.02  |    | 0.68 ± 0.04  | 1.36 ± 0.04  |
| <i>dad1</i>                      | 1.04 ± 0.03 | 0.85 ± 0.01 |   | 1.07 ± 0.02  | 0.86 ± 0.02  |    | 1.11 ± 0.03  | 0.85 ± 0.01  |    | 1.06 ± 0.03  | 0.86 ± 0.02  |
| <i>dap</i>                       | 1.02 ± 0.07 | 1.05 ± 0.03 |   | 1.08 ± 0.03  | 0.98 ± 0.03  | *  | 0.94 ± 0.04  | 0.95 ± 0.02  | *  | 0.94 ± 0.03  | 0.97 ± 0.04  |
| <i>dapkl</i>                     | 0.88 ± 0.02 | 1.37 ± 0.05 | † | 0.91 ± 0.05  | 1.15 ± 0.07† |    | 0.88 ± 0.05  | 1.24 ± 0.05  | *† | 0.91 ± 0.01  | 1.12 ± 0.08† |
| <i>daxx</i>                      | 0.89 ± 0.02 | 1.16 ± 0.03 |   | 0.89 ± 0.01  | 1.09 ± 0.02  |    | 0.89 ± 0.01  | 1.12 ± 0.03  |    | 0.88 ± 0.03  | 1.12 ± 0.04  |
| <i>dcc</i>                       | 1.28 ± 0.10 | 0.87 ± 0.05 | † | 1.02 ± 0.02† | 0.98 ± 0.05  |    | 1.28 ± 0.04  | 1.04 ± 0.11  | *† | 0.93 ± 0.11† | 0.85 ± 0.03  |
| <i>ddit3</i>                     | 1.64 ± 0.08 | 0.64 ± 0.02 |   | 1.58 ± 0.03  | 0.69 ± 0.03  |    | 1.49 ± 0.06  | 0.68 ± 0.04  |    | 1.51 ± 0.04  | 0.64 ± 0.02  |
| <i>dedd</i>                      | 0.96 ± 0.04 | 1.15 ± 0.08 |   | 1.00 ± 0.05  | 1.01 ± 0.08  |    | 0.95 ± 0.01  | 1.00 ± 0.04  |    | 1.01 ± 0.04  | 1.06 ± 0.03  |
| <i>dffa</i>                      | 1.00 ± 0.01 | 0.97 ± 0.02 | * | 1.07 ± 0.01  | 0.99 ± 0.02  |    | 1.04 ± 0.02  | 0.99 ± 0.02  |    | 1.04 ± 0.01  | 0.95 ± 0.02  |
| <i>dffb</i>                      | 1.15 ± 0.07 | 0.94 ± 0.07 |   | 1.20 ± 0.16  | 1.02 ± 0.08  | *  | 0.76 ± 0.14  | 0.77 ± 0.05  |    | 0.96 ± 0.09  | 0.95 ± 0.07  |
| <i>dnajb9</i>                    | 1.08 ± 0.03 | 0.95 ± 0.03 |   | 1.09 ± 0.02  | 0.93 ± 0.01  | *  | 0.99 ± 0.02  | 0.86 ± 0.03  |    | 1.05 ± 0.03  | 0.90 ± 0.03  |
| <i>dnase1</i>                    | 1.00 ± 0.05 | 1.02 ± 0.06 |   | 0.99 ± 0.04  | 1.06 ± 0.08  |    | 0.98 ± 0.05  | 0.99 ± 0.04  |    | 1.02 ± 0.02  | 1.05 ± 0.06  |
| <i>dnase113</i>                  | 1.05 ± 0.06 | 0.92 ± 0.05 | * | 1.08 ± 0.03  | 1.04 ± 0.04  |    | 1.02 ± 0.06  | 0.90 ± 0.07  |    | 1.02 ± 0.09  | 0.93 ± 0.03  |
| <i>dnase2</i>                    | 1.06 ± 0.03 | 1.05 ± 0.03 |   | 1.09 ± 0.06  | 0.84 ± 0.06  |    | 1.06 ± 0.02  | 0.92 ± 0.02  | †  | 1.07 ± 0.03  | 0.91 ± 0.03† |
| <i>dnm2</i>                      | 0.93 ± 0.10 | 1.14 ± 0.11 |   | 0.91 ± 0.07  | 1.06 ± 0.04  |    | 0.98 ± 0.07  | 1.04 ± 0.05  |    | 0.95 ± 0.04  | 1.07 ± 0.08  |
| <i>dpf2</i>                      | 0.93 ± 0.02 | 1.10 ± 0.03 |   | 0.92 ± 0.02  | 1.08 ± 0.02  |    | 0.92 ± 0.01  | 1.08 ± 0.03  |    | 0.93 ± 0.01  | 1.11 ± 0.01  |
| <i>dustypk</i>                   | 0.89 ± 0.02 | 1.08 ± 0.07 |   | 0.89 ± 0.08  | 0.98 ± 0.03  |    | 1.09 ± 0.08  | 1.07 ± 0.07  | *  | 0.95 ± 0.06  | 1.27 ± 0.04  |
| <i>eaf2</i>                      | 1.00 ± 0.12 | 0.97 ± 0.17 |   | 1.02 ± 0.15  | 1.45 ± 0.15  |    | 0.87 ± 0.10  | 0.76 ± 0.09  |    | 0.95 ± 0.06  | 1.03 ± 0.37  |
| <i>egln3</i>                     | 0.85 ± 0.02 | 1.22 ± 0.03 |   | 0.85 ± 0.02  | 1.19 ± 0.02  | *  | 0.82 ± 0.03  | 1.14 ± 0.02  | *  | 0.80 ± 0.02  | 1.16 ± 0.02  |
| <i>ets1</i>                      | 0.97 ± 0.04 | 1.05 ± 0.04 |   | 0.88 ± 0.01  | 1.06 ± 0.03  |    | 0.92 ± 0.02  | 1.08 ± 0.01  |    | 0.91 ± 0.01  | 1.07 ± 0.03  |
| <i>fadd</i>                      | 1.17 ± 0.06 | 0.99 ± 0.14 |   | 1.04 ± 0.07  | 0.96 ± 0.02  |    | 1.03 ± 0.04  | 0.96 ± 0.06  |    | 0.97 ± 0.08  | 0.93 ± 0.02  |
| <i>faf1</i>                      | 0.87 ± 0.03 | 1.15 ± 0.04 |   | 0.88 ± 0.02  | 1.05 ± 0.02  |    | 0.85 ± 0.04  | 1.14 ± 0.02  |    | 0.87 ± 0.02  | 1.13 ± 0.05  |
| <i>faim</i>                      | 0.98 ± 0.02 | 1.01 ± 0.02 |   | 0.98 ± 0.03  | 1.00 ± 0.02  |    | 1.04 ± 0.02  | 1.00 ± 0.01  | †  | 1.07 ± 0.03† | 0.97 ± 0.04  |
| <i>faim2</i>                     | 1.01 ± 0.04 | 1.00 ± 0.03 |   | 1.01 ± 0.05  | 0.98 ± 0.04  |    | 1.05 ± 0.03  | 1.01 ± 0.05  |    | 0.97 ± 0.02  | 0.99 ± 0.04  |
| <i>g6pdx</i>                     | 0.96 ± 0.02 | 1.03 ± 0.02 |   | 0.99 ± 0.01  | 1.02 ± 0.02  |    | 1.03 ± 0.04  | 1.06 ± 0.03  |    | 0.99 ± 0.02  | 1.06 ± 0.02  |
| <i>gapd</i>                      | 1.00 ± 0.04 | 1.05 ± 0.05 |   | 1.02 ± 0.04  | 1.01 ± 0.02  |    | 1.03 ± 0.03  | 1.02 ± 0.02  |    | 1.00 ± 0.03  | 1.03 ± 0.04  |
| <i>gch</i>                       | 1.35 ± 0.13 | 0.67 ± 0.08 |   | 1.41 ± 0.11  | 0.67 ± 0.05  |    | 1.39 ± 0.11  | 0.58 ± 0.05  | *  | 1.25 ± 0.08  | 0.48 ± 0.06  |
| <i>gjb6</i>                      | 1.43 ± 0.08 | 0.80 ± 0.02 |   | 1.71 ± 0.22  | 0.79 ± 0.05  |    | 1.36 ± 0.12  | 0.73 ± 0.04  | †  | 1.56 ± 0.07  | 0.69 ± 0.04† |
| <i>gnaq</i>                      | 0.89 ± 0.07 | 1.18 ± 0.09 |   | 0.90 ± 0.05  | 1.14 ± 0.06  |    | 0.94 ± 0.08  | 1.18 ± 0.08  |    | 0.81 ± 0.04  | 1.07 ± 0.04  |
| <i>gnrh1</i>                     | 1.14 ± 0.02 | 0.96 ± 0.03 |   | 1.06 ± 0.06  | 1.00 ± 0.06  | †  | 1.00 ± 0.05† | 0.97 ± 0.01  |    | 1.18 ± 0.09  | 0.97 ± 0.04  |
| <i>gpx1</i>                      | 1.15 ± 0.03 | 0.94 ± 0.03 |   | 1.12 ± 0.03  | 0.94 ± 0.02  | *  | 1.07 ± 0.04  | 0.91 ± 0.01  |    | 1.10 ± 0.02  | 0.94 ± 0.01  |
| <i>gsk3b</i>                     | 0.84 ± 0.05 | 1.31 ± 0.10 |   | 0.79 ± 0.03  | 1.19 ± 0.07  |    | 0.87 ± 0.03  | 1.28 ± 0.06  |    | 0.81 ± 0.08  | 1.17 ± 0.05  |
| <i>gspt1</i>                     | 0.97 ± 0.02 | 1.06 ± 0.02 |   | 0.96 ± 0.02  | 1.02 ± 0.02  |    | 0.95 ± 0.03  | 1.04 ± 0.02  |    | 0.94 ± 0.02  | 1.05 ± 0.03  |
| <i>gzma</i>                      | 1.02 ± 0.04 | 1.09 ± 0.15 |   | 1.12 ± 0.06  | 0.92 ± 0.06  |    | 0.96 ± 0.06  | 0.96 ± 0.05  |    | 1.03 ± 0.05  | 0.89 ± 0.01  |
| <i>gzmb</i>                      | 1.04 ± 0.07 | 0.98 ± 0.06 |   | 0.98 ± 0.03  | 0.94 ± 0.04  |    | 1.06 ± 0.04  | 0.98 ± 0.01  |    | 0.92 ± 0.06  | 1.01 ± 0.05  |
| <i>hdh</i>                       | 1.05 ± 0.07 | 1.03 ± 0.12 |   | 0.99 ± 0.08  | 1.09 ± 0.06  | †  | 0.83 ± 0.06† | 1.19 ± 0.07  | †  | 0.85 ± 0.04† | 1.17 ± 0.10  |
| <i>hip1</i>                      | 0.82 ± 0.04 | 1.35 ± 0.11 |   | 0.86 ± 0.05  | 1.40 ± 0.11  |    | 0.82 ± 0.02  | 1.29 ± 0.03  |    | 0.81 ± 0.03  | 1.32 ± 0.10  |
| <i>hmox1</i>                     | 1.02 ± 0.02 | 0.94 ± 0.02 |   | 1.03 ± 0.02  | 1.01 ± 0.02  |    | 1.04 ± 0.03  | 0.98 ± 0.03  |    | 1.01 ± 0.02  | 0.95 ± 0.02  |
| <i>hrpap20</i>                   | 1.12 ± 0.02 | 0.89 ± 0.02 | † | 1.05 ± 0.02† | 0.91 ± 0.01  |    | 1.12 ± 0.03  | 0.91 ± 0.03  |    | 1.12 ± 0.02  | 0.90 ± 0.02  |
| <i>hspa1a</i>                    | 1.24 ± 0.04 | 0.73 ± 0.04 |   | 1.26 ± 0.03  | 0.72 ± 0.02  |    | 1.23 ± 0.04  | 0.70 ± 0.03  |    | 1.20 ± 0.03  | 0.68 ± 0.03  |
| <i>igfl</i>                      | 1.43 ± 0.03 | 0.65 ± 0.02 | * | 1.30 ± 0.05  | 0.59 ± 0.02  | †  | 1.45 ± 0.03  | 0.56 ± 0.02† | *  | 1.32 ± 0.05  | 0.56 ± 0.02  |
| <i>igfbp3</i>                    | 0.98 ± 0.05 | 0.97 ± 0.02 | † | 0.96 ± 0.03  | 1.14 ± 0.05† |    | 0.99 ± 0.07  | 1.04 ± 0.03  |    | 0.91 ± 0.06  | 1.02 ± 0.04  |

| Supplemental Table 2 (continued) |             |             |    |              |              |    |              |              |    |              |              |
|----------------------------------|-------------|-------------|----|--------------|--------------|----|--------------|--------------|----|--------------|--------------|
| <i>il10</i>                      | 1.02 ± 0.07 | 0.91 ± 0.07 |    | 1.01 ± 0.07  | 0.87 ± 0.08  |    | 1.05 ± 0.05  | 0.93 ± 0.05  |    | 1.09 ± 0.02  | 0.82 ± 0.03  |
| <i>il18</i>                      | 1.20 ± 0.11 | 0.87 ± 0.19 |    | 0.96 ± 0.12  | 0.90 ± 0.06  |    | 1.14 ± 0.06  | 0.89 ± 0.06  |    | 1.13 ± 0.05  | 0.83 ± 0.04  |
| <i>inha</i>                      | 1.05 ± 0.03 | 0.94 ± 0.04 |    | 1.05 ± 0.03  | 0.91 ± 0.04  |    | 1.06 ± 0.05  | 0.92 ± 0.04  |    | 1.04 ± 0.04  | 0.93 ± 0.04  |
| <i>ins2</i>                      | 0.91 ± 0.04 | 0.98 ± 0.06 | *  | 1.05 ± 0.03  | 1.00 ± 0.04  | *  | 1.06 ± 0.05  | 1.09 ± 0.06  |    | 1.01 ± 0.04  | 1.03 ± 0.04  |
| <i>jak2</i>                      | 0.90 ± 0.03 | 1.14 ± 0.04 |    | 0.89 ± 0.02  | 1.16 ± 0.05  |    | 0.91 ± 0.03  | 1.11 ± 0.06  |    | 0.88 ± 0.01  | 1.17 ± 0.04  |
| <i>lcn2</i>                      | 1.22 ± 0.21 | 1.80 ± 0.28 | *  | 0.94 ± 0.11  | 0.72 ± 0.10  |    | 1.21 ± 0.31  | 1.14 ± 0.17  | *† | 1.20 ± 0.14  | 0.72 ± 0.09† |
| <i>lgals7</i>                    | 0.92 ± 0.05 | 0.91 ± 0.05 | *  | 1.00 ± 0.09  | 1.07 ± 0.06  | *  | 1.14 ± 0.06  | 0.99 ± 0.02  | *  | 1.10 ± 0.03  | 0.95 ± 0.03  |
| <i>loc170824</i>                 | 0.88 ± 0.05 | 1.05 ± 0.14 |    | 0.96 ± 0.06  | 1.07 ± 0.07  |    | 1.02 ± 0.03  | 1.10 ± 0.10  |    | 1.02 ± 0.02  | 1.13 ± 0.01  |
| <i>loc246143</i>                 | 0.99 ± 0.03 | 1.02 ± 0.03 |    | 1.01 ± 0.01  | 0.96 ± 0.04  |    | 0.99 ± 0.03  | 1.01 ± 0.04  |    | 0.99 ± 0.03  | 0.99 ± 0.03  |
| <i>loc292624</i>                 | 0.73 ± 0.03 | 1.24 ± 0.10 |    | 0.72 ± 0.03  | 1.14 ± 0.03  |    | 0.69 ± 0.01  | 1.09 ± 0.04  |    | 0.74 ± 0.01  | 1.04 ± 0.02  |
| <i>loc64171</i>                  | 1.12 ± 0.06 | 0.99 ± 0.05 | *  | 0.96 ± 0.04  | 0.86 ± 0.04  |    | 1.16 ± 0.06  | 0.94 ± 0.04  | *  | 0.96 ± 0.05  | 0.94 ± 0.04  |
| <i>madd</i>                      | 0.84 ± 0.03 | 1.20 ± 0.10 |    | 0.87 ± 0.05  | 1.10 ± 0.04  |    | 0.87 ± 0.05  | 1.08 ± 0.04  |    | 0.90 ± 0.04  | 1.12 ± 0.03  |
| <i>map3k6</i>                    | 1.46 ± 0.10 | 0.69 ± 0.05 |    | 1.47 ± 0.08  | 0.70 ± 0.02  |    | 1.50 ± 0.10  | 0.71 ± 0.03  |    | 1.39 ± 0.05  | 0.73 ± 0.03  |
| <i>mapk8ip</i>                   | 1.02 ± 0.03 | 0.96 ± 0.01 |    | 1.01 ± 0.01  | 0.98 ± 0.02  | *  | 1.07 ± 0.02  | 1.00 ± 0.01  |    | 1.00 ± 0.04  | 0.97 ± 0.02  |
| <i>mc1l</i>                      | 0.79 ± 0.03 | 1.19 ± 0.03 |    | 0.78 ± 0.03  | 1.20 ± 0.02  |    | 0.75 ± 0.02  | 1.15 ± 0.03  |    | 0.81 ± 0.05  | 1.19 ± 0.02  |
| <i>mitf</i>                      | 1.57 ± 0.05 | 0.94 ± 0.07 | *† | 1.00 ± 0.14† | 0.88 ± 0.09  | †  | 1.03 ± 0.15† | 1.01 ± 0.09  | *† | 0.98 ± 0.13† | 0.90 ± 0.08  |
| <i>mihl</i>                      | 0.93 ± 0.05 | 1.15 ± 0.06 |    | 1.01 ± 0.04  | 1.11 ± 0.06  |    | 0.88 ± 0.05  | 1.02 ± 0.04  |    | 0.93 ± 0.03  | 1.02 ± 0.06  |
| <i>moap1</i>                     | 1.12 ± 0.03 | 0.94 ± 0.02 |    | 1.12 ± 0.02  | 0.94 ± 0.01  |    | 1.10 ± 0.04  | 0.94 ± 0.01  |    | 1.13 ± 0.05  | 0.96 ± 0.03  |
| <i>myc</i>                       | 0.79 ± 0.04 | 1.19 ± 0.01 |    | 0.81 ± 0.03  | 1.22 ± 0.03  |    | 0.82 ± 0.04  | 1.18 ± 0.04  |    | 0.81 ± 0.04  | 1.18 ± 0.04  |
| <i>mycs</i>                      | 0.97 ± 0.03 | 1.03 ± 0.05 |    | 1.03 ± 0.05  | 1.03 ± 0.05  |    | 1.00 ± 0.02  | 0.98 ± 0.02  |    | 1.04 ± 0.03  | 0.98 ± 0.03  |
| <i>nalp1</i>                     | 0.96 ± 0.04 | 1.08 ± 0.04 |    | 0.95 ± 0.03  | 1.05 ± 0.02  |    | 0.96 ± 0.03  | 1.02 ± 0.04  |    | 0.98 ± 0.02  | 1.07 ± 0.02  |
| <i>nalp10</i>                    | 1.25 ± 0.08 | 0.77 ± 0.11 | †  | 0.95 ± 0.08† | 1.15 ± 0.10† | †  | 0.95 ± 0.08† | 1.01 ± 0.12  | †  | 0.82 ± 0.06† | 1.07 ± 0.09† |
| <i>nalp14</i>                    | 1.02 ± 0.03 | 1.04 ± 0.17 |    | 1.14 ± 0.07  | 0.96 ± 0.09  | †  | 1.37 ± 0.05† | 0.88 ± 0.05  |    | 1.05 ± 0.07  | 0.90 ± 0.05  |
| <i>nfkbl</i>                     | 1.24 ± 0.07 | 0.90 ± 0.03 |    | 1.18 ± 0.06  | 0.87 ± 0.02  |    | 1.17 ± 0.01  | 0.90 ± 0.03  |    | 1.14 ± 0.04  | 0.89 ± 0.02  |
| <i>ngfr</i>                      | 1.15 ± 0.06 | 0.83 ± 0.06 |    | 1.10 ± 0.07  | 0.94 ± 0.06  |    | 1.06 ± 0.05  | 0.90 ± 0.04  |    | 1.09 ± 0.04  | 0.89 ± 0.04  |
| <i>ngfrap1</i>                   | 1.01 ± 0.02 | 1.00 ± 0.06 |    | 1.02 ± 0.01  | 0.94 ± 0.03  |    | 1.03 ± 0.02  | 0.96 ± 0.04  |    | 1.05 ± 0.03  | 0.96 ± 0.04  |
| <i>nol3</i>                      | 1.49 ± 0.06 | 0.67 ± 0.03 | *  | 1.35 ± 0.04  | 0.61 ± 0.02  |    | 1.42 ± 0.03  | 0.67 ± 0.02  |    | 1.52 ± 0.08  | 0.66 ± 0.03  |
| <i>notch1</i>                    | 1.36 ± 0.14 | 0.78 ± 0.05 |    | 1.45 ± 0.12  | 0.82 ± 0.06  |    | 1.58 ± 0.11  | 0.81 ± 0.06  | *  | 1.58 ± 0.07  | 0.85 ± 0.04  |
| <i>notch2</i>                    | 1.06 ± 0.07 | 0.93 ± 0.03 |    | 0.95 ± 0.06  | 1.01 ± 0.09  |    | 0.96 ± 0.05  | 0.99 ± 0.03  |    | 1.04 ± 0.03  | 1.01 ± 0.10  |
| <i>nsmaf</i>                     | 0.78 ± 0.05 | 1.12 ± 0.02 | †  | 0.93 ± 0.04† | 0.96 ± 0.03† | *† | 1.02 ± 0.03† | 1.04 ± 0.04  | *† | 0.95 ± 0.02† | 1.09 ± 0.04  |
| <i>ntn1</i>                      | 1.22 ± 0.14 | 0.80 ± 0.04 | †  | 0.92 ± 0.05† | 1.55 ± 0.19† | †  | 0.81 ± 0.12† | 0.89 ± 0.15  | †  | 0.94 ± 0.08† | 1.08 ± 0.21  |
| <i>p2rx1</i>                     | 0.78 ± 0.07 | 1.42 ± 0.30 |    | 0.89 ± 0.20  | 1.15 ± 0.25  |    | 0.98 ± 0.07  | 1.08 ± 0.20  |    | 0.92 ± 0.09  | 0.99 ± 0.10  |
| <i>pawr</i>                      | 1.30 ± 0.13 | 0.90 ± 0.09 |    | 1.07 ± 0.02  | 0.84 ± 0.07  | *  | 1.06 ± 0.08  | 0.70 ± 0.09  | *  | 1.14 ± 0.04  | 0.65 ± 0.07  |
| <i>pdcd2</i>                     | 1.18 ± 0.02 | 0.91 ± 0.02 |    | 1.14 ± 0.02  | 0.88 ± 0.02  |    | 1.13 ± 0.04  | 0.91 ± 0.01  |    | 1.16 ± 0.04  | 0.94 ± 0.01  |
| <i>pdcd5</i>                     | 1.03 ± 0.02 | 0.96 ± 0.05 |    | 1.05 ± 0.03  | 0.94 ± 0.04  |    | 1.02 ± 0.05  | 0.95 ± 0.03  |    | 1.09 ± 0.06  | 0.93 ± 0.04  |
| <i>pdcd6ip</i>                   | 1.09 ± 0.05 | 1.03 ± 0.03 | *  | 0.96 ± 0.02  | 0.99 ± 0.02  |    | 1.02 ± 0.02  | 0.99 ± 0.02  | *  | 1.02 ± 0.02  | 0.95 ± 0.02  |
| <i>pdcd8</i>                     | 1.12 ± 0.02 | 0.93 ± 0.02 |    | 1.08 ± 0.02  | 0.92 ± 0.02  |    | 1.09 ± 0.03  | 0.95 ± 0.02  |    | 1.10 ± 0.02  | 0.94 ± 0.02  |
| <i>perp</i>                      | 1.19 ± 0.09 | 0.83 ± 0.06 |    | 1.21 ± 0.05  | 0.89 ± 0.01  |    | 1.08 ± 0.04  | 0.86 ± 0.04  |    | 1.19 ± 0.02  | 0.89 ± 0.05  |
| <i>pglyrp1</i>                   | 0.89 ± 0.03 | 1.05 ± 0.02 | †  | 0.95 ± 0.01  | 1.03 ± 0.02  | *† | 0.97 ± 0.01† | 1.04 ± 0.01  | *  | 0.96 ± 0.02  | 1.07 ± 0.02  |
| <i>phlda1</i>                    | 1.04 ± 0.02 | 0.97 ± 0.04 |    | 1.03 ± 0.01  | 0.97 ± 0.04  |    | 1.00 ± 0.02  | 0.96 ± 0.04  |    | 0.98 ± 0.03  | 0.98 ± 0.05  |
| <i>pik3r1</i>                    | 0.75 ± 0.06 | 1.10 ± 0.11 | *  | 0.90 ± 0.04  | 1.29 ± 0.06  |    | 0.86 ± 0.08  | 1.12 ± 0.04  |    | 0.87 ± 0.15  | 1.13 ± 0.11  |
| <i>plagl1</i>                    | 1.00 ± 0.04 | 0.98 ± 0.08 |    | 1.06 ± 0.06  | 0.91 ± 0.06  |    | 1.04 ± 0.08  | 0.95 ± 0.10  |    | 1.02 ± 0.04  | 0.95 ± 0.06  |
| <i>polb</i>                      | 1.05 ± 0.04 | 0.94 ± 0.01 |    | 1.04 ± 0.02  | 0.93 ± 0.03  |    | 1.11 ± 0.03  | 0.94 ± 0.01  |    | 1.05 ± 0.03  | 0.95 ± 0.04  |
| <i>ppm1f</i>                     | 0.96 ± 0.15 | 0.95 ± 0.08 |    | 1.02 ± 0.17  | 0.99 ± 0.09  |    | 1.01 ± 0.09  | 1.03 ± 0.04  |    | 0.86 ± 0.11  | 1.07 ± 0.07  |
| <i>ppp1r13b</i>                  | 1.10 ± 0.08 | 0.96 ± 0.04 |    | 1.04 ± 0.04  | 0.90 ± 0.01  |    | 1.03 ± 0.06  | 0.95 ± 0.07  |    | 1.09 ± 0.03  | 1.00 ± 0.03  |
| <i>prdx2</i>                     | 1.02 ± 0.02 | 1.00 ± 0.01 |    | 1.03 ± 0.03  | 0.98 ± 0.01  |    | 1.03 ± 0.02  | 0.99 ± 0.02  |    | 0.99 ± 0.03  | 0.97 ± 0.03  |
| <i>prkaal</i>                    | 0.74 ± 0.08 | 1.13 ± 0.09 | *  | 0.92 ± 0.07  | 1.28 ± 0.11  | *  | 0.93 ± 0.09  | 1.19 ± 0.10  |    | 0.74 ± 0.08  | 0.95 ± 0.06  |
| <i>prkca</i>                     | 0.96 ± 0.07 | 0.97 ± 0.05 |    | 0.89 ± 0.07  | 1.09 ± 0.06  | †  | 0.92 ± 0.05  | 1.16 ± 0.04† | †  | 0.80 ± 0.05† | 1.03 ± 0.07  |
| <i>prkcd</i>                     | 0.78 ± 0.02 | 1.19 ± 0.04 |    | 0.81 ± 0.03  | 1.15 ± 0.04  |    | 0.78 ± 0.03  | 1.19 ± 0.07  |    | 0.79 ± 0.02  | 1.15 ± 0.05  |
| <i>prlr</i>                      | 1.18 ± 0.06 | 0.97 ± 0.07 |    | 1.20 ± 0.30  | 0.90 ± 0.09  |    | 1.14 ± 0.13  | 0.80 ± 0.08  |    | 1.04 ± 0.16  | 0.85 ± 0.07  |
| <i>psen1</i>                     | 0.96 ± 0.03 | 1.05 ± 0.12 |    | 0.91 ± 0.08  | 1.07 ± 0.05  |    | 1.14 ± 0.10  | 1.13 ± 0.04  |    | 1.05 ± 0.06  | 1.02 ± 0.09  |
| <i>pten</i>                      | 0.86 ± 0.02 | 1.11 ± 0.07 |    | 0.83 ± 0.03  | 1.16 ± 0.05  |    | 0.93 ± 0.08  | 1.18 ± 0.03  |    | 0.80 ± 0.10  | 1.16 ± 0.07  |
| <i>ptma</i>                      | 0.84 ± 0.06 | 1.26 ± 0.05 |    | 0.78 ± 0.02  | 1.23 ± 0.06  |    | 0.77 ± 0.02  | 1.22 ± 0.04  |    | 0.75 ± 0.03  | 1.20 ± 0.06  |
| <i>pycard</i>                    | 1.00 ± 0.02 | 1.03 ± 0.02 | *  | 0.96 ± 0.03  | 0.98 ± 0.02  |    | 1.00 ± 0.02  | 1.01 ± 0.03  | †  | 1.03 ± 0.02  | 0.94 ± 0.03† |
| <i>rabep1</i>                    | 1.01 ± 0.03 | 0.98 ± 0.01 |    | 1.02 ± 0.01  | 0.98 ± 0.01  |    | 1.05 ± 0.03  | 1.00 ± 0.01  |    | 1.05 ± 0.04  | 0.99 ± 0.02  |
| <i>rara</i>                      | 0.91 ± 0.05 | 0.81 ± 0.09 | *  | 1.07 ± 0.07  | 0.97 ± 0.05  | *  | 1.04 ± 0.05  | 1.00 ± 0.09  | *  | 1.07 ± 0.03  | 1.02 ± 0.05  |
| <i>ripk3</i>                     | 1.30 ± 0.07 | 0.94 ± 0.02 | †  | 1.09 ± 0.07† | 1.02 ± 0.07  |    | 1.09 ± 0.06  | 0.92 ± 0.06  | *  | 1.14 ± 0.07  | 0.89 ± 0.05  |
| <i>rock1</i>                     | 1.00 ± 0.06 | 0.85 ± 0.05 |    | 1.04 ± 0.09  | 0.85 ± 0.07  |    | 1.07 ± 0.06  | 0.92 ± 0.04  | *  | 1.14 ± 0.05  | 0.93 ± 0.07  |

|                  |             |             |    |              |              |    |              |              |    |              |              |
|------------------|-------------|-------------|----|--------------|--------------|----|--------------|--------------|----|--------------|--------------|
| <i>rtn4</i>      | 0.87 ± 0.03 | 1.09 ± 0.06 |    | 0.93 ± 0.04  | 1.08 ± 0.03  |    | 0.99 ± 0.06  | 1.11 ± 0.05  |    | 0.93 ± 0.03  | 1.14 ± 0.05  |
| <i>s100b</i>     | 1.59 ± 0.14 | 0.85 ± 0.07 |    | 1.49 ± 0.20  | 0.69 ± 0.13  |    | 1.49 ± 0.20  | 0.66 ± 0.14  |    | 1.71 ± 0.15  | 0.71 ± 0.12  |
| <i>scn2a1</i>    | 0.95 ± 0.04 | 1.00 ± 0.04 |    | 0.95 ± 0.03  | 1.03 ± 0.03  |    | 0.97 ± 0.03  | 1.05 ± 0.03  |    | 0.95 ± 0.04  | 1.05 ± 0.04  |
| <i>sgk</i>       | 0.94 ± 0.04 | 1.24 ± 0.07 |    | 0.87 ± 0.04  | 1.17 ± 0.06  | *  | 0.87 ± 0.04  | 1.11 ± 0.05  |    | 0.90 ± 0.03  | 1.23 ± 0.09  |
| <i>sh3kbp1</i>   | 0.99 ± 0.02 | 0.98 ± 0.04 |    | 0.98 ± 0.02  | 1.00 ± 0.02  |    | 1.03 ± 0.04  | 1.02 ± 0.01  |    | 1.00 ± 0.01  | 1.00 ± 0.03  |
| <i>sh3md2</i>    | 1.01 ± 0.09 | 1.10 ± 0.05 |    | 0.97 ± 0.14  | 0.98 ± 0.08  |    | 1.01 ± 0.09  | 1.02 ± 0.07  | †  | 1.09 ± 0.06  | 0.91 ± 0.07† |
| <i>siah2</i>     | 0.89 ± 0.05 | 1.12 ± 0.06 |    | 0.86 ± 0.07  | 1.01 ± 0.01  |    | 0.98 ± 0.06  | 1.04 ± 0.02  |    | 0.89 ± 0.02  | 1.03 ± 0.01  |
| <i>sod1</i>      | 1.29 ± 0.03 | 0.69 ± 0.02 | *  | 1.42 ± 0.02  | 0.72 ± 0.01  | *  | 1.47 ± 0.03  | 0.74 ± 0.02  | *  | 1.42 ± 0.04  | 0.73 ± 0.03  |
| <i>spata3</i>    | 1.15 ± 0.08 | 0.89 ± 0.05 | †  | 1.03 ± 0.06  | 1.02 ± 0.03† | †  | 1.05 ± 0.09  | 1.09 ± 0.05† | †  | 1.00 ± 0.02  | 1.01 ± 0.05  |
| <i>spp1</i>      | 1.67 ± 0.09 | 0.62 ± 0.07 |    | 1.73 ± 0.19  | 0.57 ± 0.09  |    | 1.59 ± 0.12  | 0.52 ± 0.06  |    | 1.82 ± 0.13  | 0.53 ± 0.06  |
| <i>stambp</i>    | 1.00 ± 0.01 | 1.13 ± 0.01 | *  | 0.94 ± 0.01  | 1.06 ± 0.01  | *† | 0.95 ± 0.01† | 0.97 ± 0.02† | *† | 0.98 ± 0.01  | 1.04 ± 0.02† |
| <i>stk17b</i>    | 0.97 ± 0.04 | 1.06 ± 0.05 |    | 0.96 ± 0.03  | 1.03 ± 0.04  |    | 0.97 ± 0.06  | 1.01 ± 0.01  |    | 0.99 ± 0.03  | 1.02 ± 0.03  |
| <i>stk3</i>      | 1.09 ± 0.07 | 0.95 ± 0.02 |    | 1.17 ± 0.04  | 0.94 ± 0.02  |    | 1.09 ± 0.06  | 0.92 ± 0.01  |    | 1.15 ± 0.04  | 0.94 ± 0.03  |
| <i>stnl</i>      | 1.05 ± 0.04 | 0.98 ± 0.06 |    | 1.14 ± 0.04  | 0.93 ± 0.03  | †  | 1.19 ± 0.04† | 0.89 ± 0.02  |    | 1.16 ± 0.06  | 0.93 ± 0.02  |
| <i>tax1bp1</i>   | 1.00 ± 0.02 | 0.99 ± 0.01 |    | 0.99 ± 0.01  | 0.99 ± 0.02  |    | 1.02 ± 0.02  | 1.00 ± 0.02  |    | 1.01 ± 0.02  | 1.01 ± 0.01  |
| <i>tegt</i>      | 1.02 ± 0.04 | 1.07 ± 0.02 |    | 0.96 ± 0.03  | 1.05 ± 0.03  | *  | 0.94 ± 0.02  | 1.03 ± 0.01  | *  | 0.93 ± 0.02  | 1.01 ± 0.03  |
| <i>tesk2</i>     | 1.01 ± 0.09 | 0.92 ± 0.07 |    | 1.12 ± 0.10  | 1.05 ± 0.09  |    | 0.98 ± 0.04  | 0.92 ± 0.11  |    | 1.03 ± 0.04  | 1.00 ± 0.07  |
| <i>tfpt</i>      | 0.92 ± 0.04 | 1.07 ± 0.06 |    | 0.90 ± 0.07  | 1.09 ± 0.08  |    | 0.98 ± 0.05  | 0.99 ± 0.04  |    | 1.04 ± 0.06  | 1.09 ± 0.03  |
| <i>tgfa</i>      | 1.00 ± 0.03 | 1.07 ± 0.04 |    | 0.97 ± 0.02  | 1.06 ± 0.02  |    | 1.04 ± 0.06  | 1.03 ± 0.02  |    | 0.91 ± 0.04  | 1.00 ± 0.01  |
| <i>tgm2</i>      | 0.98 ± 0.05 | 1.14 ± 0.03 |    | 0.90 ± 0.05  | 1.07 ± 0.04  | *  | 0.88 ± 0.03  | 1.02 ± 0.03  |    | 0.93 ± 0.02  | 1.09 ± 0.04  |
| <i>thap1</i>     | 0.87 ± 0.06 | 0.93 ± 0.07 |    | 0.87 ± 0.09  | 1.04 ± 0.08  | *  | 1.12 ± 0.14  | 1.15 ± 0.17  |    | 0.96 ± 0.07  | 1.03 ± 0.06  |
| <i>tieg</i>      | 1.08 ± 0.05 | 1.10 ± 0.02 | *  | 1.01 ± 0.04  | 1.03 ± 0.02  | *  | 0.97 ± 0.02  | 0.99 ± 0.02  | *  | 0.93 ± 0.02  | 0.97 ± 0.03  |
| <i>timp3</i>     | 0.95 ± 0.06 | 0.97 ± 0.10 |    | 1.13 ± 0.10  | 1.06 ± 0.13  |    | 0.99 ± 0.05  | 0.99 ± 0.09  |    | 0.94 ± 0.06  | 0.98 ± 0.07  |
| <i>tnf</i>       | 1.75 ± 0.26 | 0.89 ± 0.12 | †  | 0.99 ± 0.11† | 1.11 ± 0.13  | †  | 1.29 ± 0.18† | 1.04 ± 0.09  | *† | 0.70 ± 0.11† | 0.98 ± 0.15  |
| <i>tnfrsf11b</i> | 1.04 ± 0.07 | 0.85 ± 0.04 | *  | 1.15 ± 0.07  | 0.98 ± 0.03  |    | 1.04 ± 0.04  | 0.96 ± 0.03  | *  | 1.15 ± 0.04  | 0.96 ± 0.03  |
| <i>tnfrsf1a</i>  | 1.24 ± 0.01 | 0.97 ± 0.02 | *  | 1.16 ± 0.05  | 0.95 ± 0.01  | *  | 1.15 ± 0.05  | 0.94 ± 0.02  | *  | 1.22 ± 0.03  | 0.91 ± 0.02  |
| <i>tnfrsf6</i>   | 1.10 ± 0.09 | 0.94 ± 0.18 | *  | 1.39 ± 0.05  | 1.01 ± 0.05  |    | 1.18 ± 0.10  | 0.84 ± 0.04  |    | 1.10 ± 0.07  | 0.92 ± 0.03  |
| <i>tnfsf10</i>   | 1.48 ± 0.32 | 0.90 ± 0.20 |    | 1.20 ± 0.25  | 0.96 ± 0.15  |    | 1.00 ± 0.21  | 1.30 ± 0.32  |    | 1.26 ± 0.18  | 0.72 ± 0.09  |
| <i>tp53</i>      | 0.93 ± 0.03 | 1.20 ± 0.04 | *† | 0.93 ± 0.02  | 1.03 ± 0.03† | *† | 0.99 ± 0.03  | 0.97 ± 0.01† | †  | 1.08 ± 0.08  | 1.10 ± 0.03  |
| <i>tpt1</i>      | 1.04 ± 0.04 | 1.04 ± 0.02 | *  | 0.95 ± 0.01  | 0.97 ± 0.04  |    | 0.97 ± 0.02  | 1.01 ± 0.03  |    | 1.00 ± 0.01  | 1.03 ± 0.03  |
| <i>tradd</i>     | 1.24 ± 0.06 | 0.89 ± 0.08 |    | 1.23 ± 0.06  | 0.93 ± 0.04  |    | 1.14 ± 0.06  | 0.83 ± 0.03  |    | 1.17 ± 0.05  | 0.83 ± 0.04  |
| <i>trib3</i>     | 1.21 ± 0.03 | 0.83 ± 0.03 |    | 1.29 ± 0.03  | 0.82 ± 0.04  | *  | 1.36 ± 0.04  | 0.85 ± 0.02  |    | 1.17 ± 0.05  | 0.79 ± 0.02  |
| <i>trp63</i>     | 0.83 ± 0.09 | 1.05 ± 0.10 |    | 1.02 ± 0.06  | 0.96 ± 0.09  | †  | 1.06 ± 0.07  | 0.92 ± 0.05  | †  | 1.03 ± 0.07  | 0.89 ± 0.08  |
| <i>tsarg1</i>    | 1.10 ± 0.09 | 0.97 ± 0.05 |    | 0.99 ± 0.08  | 1.04 ± 0.07  |    | 1.00 ± 0.12  | 0.99 ± 0.09  |    | 1.08 ± 0.07  | 1.03 ± 0.03  |
| <i>twist2</i>    | 1.03 ± 0.06 | 0.81 ± 0.06 | †  | 0.92 ± 0.05  | 1.13 ± 0.08† | †  | 0.92 ± 0.04  | 0.99 ± 0.07† | *  | 1.07 ± 0.05  | 0.99 ± 0.06  |
| <i>txn1l</i>     | 1.00 ± 0.01 | 0.97 ± 0.02 |    | 0.97 ± 0.02  | 0.97 ± 0.02  |    | 1.00 ± 0.02  | 0.99 ± 0.02  |    | 1.03 ± 0.03  | 0.98 ± 0.02  |
| <i>ube1c</i>     | 0.99 ± 0.03 | 0.97 ± 0.05 |    | 0.97 ± 0.03  | 1.04 ± 0.01  |    | 0.99 ± 0.01  | 1.04 ± 0.01  |    | 0.97 ± 0.04  | 1.04 ± 0.02  |
| <i>unc5a</i>     | 0.97 ± 0.06 | 1.03 ± 0.02 |    | 1.03 ± 0.05  | 0.99 ± 0.04  |    | 0.94 ± 0.07  | 1.07 ± 0.04  |    | 0.90 ± 0.04  | 1.04 ± 0.04  |
| <i>unc5b</i>     | 1.04 ± 0.10 | 1.12 ± 0.17 |    | 0.90 ± 0.07  | 1.04 ± 0.08  |    | 0.98 ± 0.04  | 1.00 ± 0.08  |    | 0.90 ± 0.05  | 0.99 ± 0.03  |
| <i>v1rd22</i>    | 1.07 ± 0.11 | 1.09 ± 0.05 |    | 1.00 ± 0.07  | 1.00 ± 0.03  |    | 0.96 ± 0.07  | 1.08 ± 0.05  |    | 0.94 ± 0.03  | 1.08 ± 0.06  |
| <i>vdr</i>       | 0.92 ± 0.08 | 0.84 ± 0.05 | *  | 1.30 ± 0.11  | 1.06 ± 0.06  | †  | 1.32 ± 0.07† | 0.81 ± 0.09  | †  | 1.45 ± 0.27  | 0.73 ± 0.09  |
| <i>vegf</i>      | 0.95 ± 0.03 | 1.02 ± 0.02 |    | 0.93 ± 0.02  | 1.04 ± 0.02  |    | 0.95 ± 0.02  | 1.04 ± 0.02  |    | 0.99 ± 0.01  | 1.05 ± 0.03  |
| <i>wig1</i>      | 1.08 ± 0.02 | 0.92 ± 0.02 |    | 1.02 ± 0.03  | 0.92 ± 0.04  |    | 1.10 ± 0.01  | 0.96 ± 0.02  |    | 1.10 ± 0.03  | 0.92 ± 0.02  |
| <i>ywhah</i>     | 0.98 ± 0.03 | 1.00 ± 0.03 |    | 1.02 ± 0.01  | 0.99 ± 0.02  |    | 1.03 ± 0.01  | 0.97 ± 0.02  |    | 0.99 ± 0.02  | 1.00 ± 0.04  |
| <i>zd10b</i>     | 0.94 ± 0.04 | 1.08 ± 0.04 |    | 0.90 ± 0.03  | 1.08 ± 0.04  |    | 0.89 ± 0.02  | 1.09 ± 0.04  |    | 0.96 ± 0.03  | 1.05 ± 0.01  |
| <i>zfp162</i>    | 0.98 ± 0.18 | 1.45 ± 0.13 | *  | 0.74 ± 0.03  | 1.05 ± 0.11  |    | 1.07 ± 0.07  | 1.17 ± 0.12  |    | 0.90 ± 0.06  | 1.08 ± 0.04  |

Normalized expression ratios are given as mean ± SE obtained from five animals in each group, with the sample from each animal run on a separate array. CPF1 = 1 mg/kg chlorpyrifos; DZN1 = 1 mg/kg diazinon; DZN2 = 2 mg/kg diazinon. Several of the values reported in this table have appeared in previous studies of other gene groupings [2,7-9].

\*Significant main treatment effect in two-factor ANOVA (treatment, region).

†Interaction of treatment × region; then, † denotes significant treatment effect for a given region.

Global statistical analysis of Table 2: ANOVA factors of treatment, gene, region<sup>§</sup>

All treatments: treatment main effect,  $p < 0.0009$ ; treatment  $\times$  gene  $p < 0.0001$ ; treatment  $\times$  gene  $\times$  region,  $p < 0.0007$

brainstem: treatment  $\times$  gene,  $p < 0.0001$

forebrain: treatment main effect,  $p < 0.008$ ; treatment  $\times$  gene,  $p < 0.0001$

Control vs. CPF1: treatment main effect (Control  $>$  CPF1),  $p < 0.05$ ; treatment  $\times$  gene,  $p < 0.0001$ ; treatment  $\times$  gene  $\times$  region,  $p < 0.0003$

brainstem: treatment  $\times$  gene,  $p < 0.03$

forebrain: treatment  $\times$  gene,  $p < 0.0001$

Control vs. DZN1: treatment main effect (Control  $>$  DZN1),  $p < 0.02$ ; treatment  $\times$  gene,  $p < 0.0001$ ; treatment  $\times$  gene  $\times$  region,  $p < 0.0001$

brainstem: treatment  $\times$  gene,  $p < 0.0001$

forebrain: treatment main effect (Control  $>$  DZN1),  $p < 0.05$ ; treatment  $\times$  gene,  $p < 0.0005$

Control vs. DZN2: main effect of treatment (Control  $>$  DZN2),  $p < 0.0001$ ; treatment  $\times$  gene,  $p < 0.0001$ ; treatment  $\times$  gene  $\times$  region,  $p < 0.0001$

brainstem: treatment main effect (Control  $>$  DZN2),  $p < 0.02$ ; treatment  $\times$  gene,  $p < 0.0001$

forebrain: treatment main effect (Control  $>$  DZN2),  $p < 0.002$ ; treatment  $\times$  gene,  $p < 0.0001$

<sup>§</sup>results shown include only treatment effects and interactions of treatment with other variables

| Supplemental Table 3. Cell Cycle Genes In Vitro |                  |             |              |              |                 |             |              |    |              |              |
|-------------------------------------------------|------------------|-------------|--------------|--------------|-----------------|-------------|--------------|----|--------------|--------------|
| Gene                                            | Undifferentiated |             |              |              | Differentiating |             |              |    |              |              |
|                                                 | Control          |             | Chlorpyrifos |              | Control         |             | Chlorpyrifos |    |              |              |
|                                                 | 24h              | 72h         |              | 24h          | 72h             | 24h         | 72h          |    | 24h          | 72h          |
| <i>aatf</i>                                     | 1.14 ± 0.05      | 1.14 ± 0.07 |              | 1.17 ± 0.04  | 1.10 ± 0.05     | 0.85 ± 0.04 | 0.86 ± 0.05  |    | 0.85 ± 0.05  | 0.88 ± 0.05  |
| <i>acly</i>                                     | 0.91 ± 0.04      | 0.85 ± 0.03 |              | 0.93 ± 0.04  | 0.87 ± 0.03     | 1.14 ± 0.04 | 1.10 ± 0.05  |    | 1.14 ± 0.05  | 1.09 ± 0.04  |
| <i>adcyp1</i>                                   | 0.93 ± 0.04      | 0.98 ± 0.03 |              | 0.91 ± 0.05  | 0.97 ± 0.02     | 0.99 ± 0.04 | 1.03 ± 0.04  |    | 1.01 ± 0.03  | 1.05 ± 0.02  |
| <i>ahr</i>                                      | 0.97 ± 0.08      | 1.05 ± 0.07 |              | 1.05 ± 0.05  | 1.14 ± 0.05     | 0.82 ± 0.07 | 0.94 ± 0.06  |    | 0.98 ± 0.05  | 1.05 ± 0.11  |
| <i>ak1</i>                                      | 0.98 ± 0.10      | 1.09 ± 0.03 |              | 1.03 ± 0.06  | 1.08 ± 0.08     | 0.83 ± 0.05 | 1.02 ± 0.09  |    | 0.95 ± 0.04  | 0.96 ± 0.02  |
| <i>akt1</i>                                     | 0.94 ± 0.04      | 0.88 ± 0.02 |              | 0.91 ± 0.02  | 0.91 ± 0.02     | 1.03 ± 0.03 | 1.09 ± 0.01  | †  | 1.13 ± 0.04  | 1.08 ± 0.03  |
| <i>akt2</i>                                     | 0.80 ± 0.10      | 1.91 ± 0.44 |              | 0.86 ± 0.11  | 1.50 ± 0.21     | 0.51 ± 0.08 | 1.28 ± 0.20  | †  | 1.14 ± 0.16† | 1.25 ± 0.40  |
| <i>anxa1</i>                                    | 0.95 ± 0.05      | 0.99 ± 0.04 |              | 0.99 ± 0.04  | 0.98 ± 0.02     | 1.01 ± 0.03 | 0.99 ± 0.03  |    | 1.07 ± 0.02  | 0.99 ± 0.02  |
| <i>apbb1</i>                                    | 1.01 ± 0.02      | 1.01 ± 0.02 |              | 1.02 ± 0.01  | 1.02 ± 0.03     | 0.88 ± 0.03 | 1.07 ± 0.04  |    | 0.87 ± 0.02  | 1.04 ± 0.03  |
| <i>apc</i>                                      | 1.08 ± 0.16      | 1.08 ± 0.10 | *            | 0.87 ± 0.09  | 0.89 ± 0.03     | 1.01 ± 0.13 | 1.02 ± 0.03  |    | 1.12 ± 0.09  | 1.19 ± 0.09  |
| <i>appbp1</i>                                   | 1.06 ± 0.03      | 1.05 ± 0.01 |              | 1.06 ± 0.02  | 1.06 ± 0.03     | 1.00 ± 0.02 | 0.83 ± 0.01  | *  | 0.94 ± 0.02  | 0.82 ± 0.02  |
| <i>araf1</i>                                    | 0.92 ± 0.04      | 1.01 ± 0.04 |              | 0.94 ± 0.02  | 1.02 ± 0.03     | 1.01 ± 0.03 | 1.07 ± 0.04  |    | 1.06 ± 0.05  | 1.08 ± 0.06  |
| <i>atm</i>                                      | 1.43 ± 0.07      | 1.29 ± 0.06 | *            | 1.28 ± 0.09  | 1.15 ± 0.05     | 0.86 ± 0.05 | 0.72 ± 0.02  | *  | 0.80 ± 0.04  | 0.64 ± 0.03  |
| <i>aurkb</i>                                    | 1.11 ± 0.05      | 1.13 ± 0.08 |              | 1.11 ± 0.06  | 1.09 ± 0.06     | 0.99 ± 0.04 | 0.72 ± 0.03  |    | 1.04 ± 0.05  | 0.69 ± 0.02  |
| <i>axin2</i>                                    | 1.36 ± 0.13      | 1.35 ± 0.06 | *†           | 1.24 ± 0.09  | 0.94 ± 0.07†    | 0.78 ± 0.12 | 0.76 ± 0.06  |    | 0.88 ± 0.13  | 0.77 ± 0.09  |
| <i>bcl10</i>                                    | 0.78 ± 0.02      | 0.77 ± 0.01 |              | 0.81 ± 0.01  | 0.78 ± 0.01     | 1.44 ± 0.03 | 1.22 ± 0.03  |    | 1.47 ± 0.04  | 1.26 ± 0.02  |
| <i>bin1</i>                                     | 0.88 ± 0.02      | 0.91 ± 0.02 |              | 0.89 ± 0.01  | 0.95 ± 0.02     | 1.07 ± 0.03 | 1.29 ± 0.04  |    | 1.12 ± 0.02  | 1.34 ± 0.02  |
| <i>bmyc</i>                                     | 1.04 ± 0.02      | 1.00 ± 0.01 | *†           | 0.94 ± 0.02† | 1.00 ± 0.02     | 0.97 ± 0.01 | 1.07 ± 0.02  | *  | 0.91 ± 0.01  | 1.06 ± 0.02  |
| <i>brca1</i>                                    | 1.00 ± 0.05      | 1.35 ± 0.02 | †            | 1.40 ± 0.11† | 1.24 ± 0.15     | 1.03 ± 0.10 | 0.80 ± 0.07  |    | 0.92 ± 0.06  | 0.90 ± 0.07  |
| <i>btg3</i>                                     | 0.71 ± 0.04      | 0.75 ± 0.02 | *            | 0.74 ± 0.02  | 0.82 ± 0.02     | 1.21 ± 0.03 | 1.36 ± 0.03  | *  | 1.29 ± 0.05  | 1.58 ± 0.02  |
| <i>bzw1</i>                                     | 0.95 ± 0.02      | 0.92 ± 0.01 | *            | 1.01 ± 0.02  | 1.00 ± 0.01     | 1.00 ± 0.03 | 1.15 ± 0.02  |    | 0.98 ± 0.04  | 1.15 ± 0.03  |
| <i>calm1</i>                                    | 0.94 ± 0.02      | 1.03 ± 0.03 |              | 0.92 ± 0.02  | 0.98 ± 0.02     | 1.13 ± 0.02 | 1.00 ± 0.02  |    | 1.12 ± 0.04  | 1.02 ± 0.04  |
| <i>calm2</i>                                    | 0.92 ± 0.01      | 0.88 ± 0.01 |              | 0.91 ± 0.01  | 0.91 ± 0.02     | 1.18 ± 0.02 | 1.46 ± 0.02  | *  | 1.12 ± 0.03  | 1.29 ± 0.04  |
| <i>calm3</i>                                    | 1.06 ± 0.02      | 1.07 ± 0.03 |              | 1.03 ± 0.02  | 1.09 ± 0.04     | 0.87 ± 0.02 | 1.02 ± 0.03  | *  | 1.79 ± 0.01  | 0.94 ± 0.02  |
| <i>camk2a</i>                                   | 0.95 ± 0.04      | 1.02 ± 0.06 |              | 0.95 ± 0.03  | 1.04 ± 0.04     | 1.15 ± 0.04 | 0.95 ± 0.04  |    | 1.10 ± 0.04  | 0.96 ± 0.03  |
| <i>camk2b</i>                                   | 0.88 ± 0.07      | 0.89 ± 0.09 | *            | 0.94 ± 0.05  | 1.15 ± 0.09     | 0.87 ± 0.09 | 1.18 ± 0.11  |    | 0.99 ± 0.14  | 1.19 ± 0.14  |
| <i>camk2d</i>                                   | 1.00 ± 0.10      | 0.93 ± 0.07 |              | 1.04 ± 0.06  | 0.93 ± 0.08     | 0.97 ± 0.04 | 0.96 ± 0.08  | *  | 1.05 ± 0.08  | 1.23 ± 0.11  |
| <i>camk2g</i>                                   | 0.95 ± 0.03      | 0.96 ± 0.04 |              | 0.94 ± 0.05  | 0.92 ± 0.02     | 0.97 ± 0.02 | 1.11 ± 0.02  | *  | 1.05 ± 0.05  | 1.20 ± 0.04  |
| <i>casp3</i>                                    | 0.89 ± 0.06      | 0.98 ± 0.02 |              | 0.94 ± 0.05  | 0.98 ± 0.07     | 1.19 ± 0.04 | 0.90 ± 0.06  | †  | 0.94 ± 0.02† | 1.14 ± 0.06† |
| <i>ccnb1</i>                                    | 1.04 ± 0.04      | 1.13 ± 0.01 |              | 1.04 ± 0.02  | 1.18 ± 0.01     | 1.00 ± 0.01 | 0.93 ± 0.03  | *  | 0.91 ± 0.04  | 0.82 ± 0.03  |
| <i>ccnc</i>                                     | 0.85 ± 0.06      | 0.91 ± 0.03 | *            | 0.91 ± 0.05  | 1.02 ± 0.04     | 1.04 ± 0.06 | 1.27 ± 0.02  |    | 1.05 ± 0.05  | 1.38 ± 0.04  |
| <i>ccnd1</i>                                    | 0.95 ± 0.03      | 0.91 ± 0.03 |              | 1.01 ± 0.06  | 0.97 ± 0.01     | 1.02 ± 0.04 | 1.72 ± 0.06  | *  | 1.05 ± 0.04  | 2.07 ± 0.11  |
| <i>ccnd2</i>                                    | 0.96 ± 0.05      | 1.07 ± 0.04 | †            | 1.12 ± 0.06  | 0.97 ± 0.06     | 1.05 ± 0.05 | 1.05 ± 0.03  | *  | 0.96 ± 0.06  | 0.92 ± 0.04  |
| <i>ccnd3</i>                                    | 0.95 ± 0.01      | 0.98 ± 0.01 | *            | 1.00 ± 0.02  | 1.00 ± 0.01     | 0.95 ± 0.03 | 1.12 ± 0.04  |    | 0.98 ± 0.03  | 1.06 ± 0.01  |
| <i>ccnf</i>                                     | 1.02 ± 0.07      | 1.06 ± 0.13 |              | 0.93 ± 0.04  | 1.08 ± 0.05     | 0.97 ± 0.07 | 1.01 ± 0.05  |    | 1.02 ± 0.02  | 0.97 ± 0.06  |
| <i>ccng1</i>                                    | 0.79 ± 0.01      | 0.81 ± 0.01 | *†           | 0.84 ± 0.01† | 0.96 ± 0.01†    | 1.08 ± 0.03 | 1.67 ± 0.02  | *† | 1.14 ± 0.02  | 1.89 ± 0.01† |
| <i>ccnh</i>                                     | 0.93 ± 0.02      | 0.93 ± 0.02 | *            | 0.99 ± 0.03  | 0.96 ± 0.02     | 1.11 ± 0.03 | 1.02 ± 0.02  | *  | 1.15 ± 0.03  | 1.11 ± 0.03  |
| <i>ccpg1</i>                                    | 1.31 ± 0.04      | 1.10 ± 0.10 | †            | 1.18 ± 0.03† | 1.22 ± 0.05     | 0.89 ± 0.07 | 0.84 ± 0.07  |    | 0.76 ± 0.07  | 0.78 ± 0.06  |
| <i>cckr</i>                                     | 0.77 ± 0.06      | 0.80 ± 0.02 | *            | 0.84 ± 0.03  | 0.88 ± 0.02     | 1.16 ± 0.04 | 1.34 ± 0.05  |    | 1.20 ± 0.05  | 1.37 ± 0.04  |
| <i>cdc10</i>                                    | 0.97 ± 0.03      | 0.92 ± 0.01 |              | 1.00 ± 0.04  | 0.93 ± 0.01     | 1.05 ± 0.01 | 1.01 ± 0.02  |    | 1.11 ± 0.03  | 1.02 ± 0.05  |
| <i>cdc14a</i>                                   | 1.86 ± 0.51      | 0.76 ± 0.10 | †            | 1.12 ± 0.02  | 1.01 ± 0.08     | 1.07 ± 0.20 | 0.85 ± 0.11  |    | 0.95 ± 0.09  | 0.85 ± 0.10  |
| <i>cdc14b</i>                                   | 1.44 ± 0.18      | 1.01 ± 0.07 | *            | 0.91 ± 0.05  | 0.89 ± 0.06     | 1.03 ± 0.09 | 0.96 ± 0.13  |    | 1.10 ± 0.13  | 0.98 ± 0.10  |
| <i>cdc16</i>                                    | 0.99 ± 0.02      | 0.98 ± 0.02 |              | 1.00 ± 0.02  | 1.00 ± 0.01     | 1.02 ± 0.01 | 1.00 ± 0.01  | †  | 1.07 ± 0.02† | 0.99 ± 0.01  |
| <i>cdc20</i>                                    | 1.03 ± 0.03      | 1.08 ± 0.02 |              | 1.00 ± 0.02  | 1.04 ± 0.02     | 0.97 ± 0.03 | 0.98 ± 0.02  |    | 0.94 ± 0.01  | 1.02 ± 0.03  |
| <i>cdc23</i>                                    | 1.06 ± 0.06      | 1.04 ± 0.04 |              | 1.07 ± 0.05  | 0.98 ± 0.02     | 0.97 ± 0.03 | 1.01 ± 0.04  |    | 0.98 ± 0.05  | 1.01 ± 0.05  |
| <i>cdc25a</i>                                   | 1.12 ± 0.12      | 1.02 ± 0.08 |              | 1.00 ± 0.05  | 0.95 ± 0.08     | 1.07 ± 0.08 | 0.77 ± 0.07  |    | 1.00 ± 0.07  | 0.93 ± 0.09  |
| <i>cdc25b</i>                                   | 0.97 ± 0.03      | 0.96 ± 0.02 |              | 0.98 ± 0.02  | 1.02 ± 0.01     | 1.03 ± 0.03 | 0.99 ± 0.02  | *  | 1.10 ± 0.03  | 1.03 ± 0.02  |
| <i>cdc25c</i>                                   | 0.96 ± 0.08      | 0.93 ± 0.07 |              | 1.02 ± 0.08  | 0.96 ± 0.09     | 1.25 ± 0.09 | 1.17 ± 0.15  | *  | 0.98 ± 0.07  | 0.91 ± 0.04  |
| <i>cdc27</i>                                    | 1.12 ± 0.07      | 0.94 ± 0.06 | †            | 0.86 ± 0.05† | 1.17 ± 0.11     | 1.03 ± 0.02 | 1.28 ± 0.13  | *† | 1.03 ± 0.06  | 0.86 ± 0.05† |
| <i>cdc2a</i>                                    | 1.04 ± 0.01      | 1.03 ± 0.01 |              | 1.03 ± 0.01  | 1.05 ± 0.01     | 0.97 ± 0.01 | 0.86 ± 0.01  | *  | 0.86 ± 0.01  | 0.79 ± 0.01  |
| <i>cdc211</i>                                   | 1.05 ± 0.04      | 1.02 ± 0.04 |              | 0.98 ± 0.03  | 1.06 ± 0.04     | 1.00 ± 0.04 | 0.97 ± 0.03  |    | 1.02 ± 0.02  | 0.90 ± 0.02  |
| <i>cdc215</i>                                   | 0.97 ± 0.03      | 0.97 ± 0.03 |              | 1.04 ± 0.02  | 0.94 ± 0.03     | 1.04 ± 0.04 | 0.95 ± 0.03  |    | 1.05 ± 0.02  | 0.99 ± 0.02  |
| <i>cdc34</i>                                    | 0.98 ± 0.02      | 0.98 ± 0.01 |              | 0.98 ± 0.03  | 1.01 ± 0.01     | 0.99 ± 0.02 | 1.02 ± 0.02  |    | 1.00 ± 0.02  | 1.05 ± 0.02  |
| <i>cdc37</i>                                    | 0.98 ± 0.03      | 1.06 ± 0.02 |              | 0.99 ± 0.03  | 1.04 ± 0.04     | 0.94 ± 0.03 | 0.99 ± 0.04  |    | 1.00 ± 0.04  | 0.99 ± 0.04  |

| Supplemental Table 3 (continued) |             |             |   |              |              |             |             |    |              |              |
|----------------------------------|-------------|-------------|---|--------------|--------------|-------------|-------------|----|--------------|--------------|
| <i>cdc37l</i>                    | 1.01 ± 0.01 | 0.98 ± 0.03 |   | 0.97 ± 0.02  | 1.00 ± 0.05  | 1.01 ± 0.02 | 1.00 ± 0.01 |    | 1.08 ± 0.04  | 1.03 ± 0.05  |
| <i>cdc40</i>                     | 1.08 ± 0.06 | 1.06 ± 0.09 |   | 1.01 ± 0.11  | 1.19 ± 0.09  | 1.05 ± 0.07 | 0.82 ± 0.07 |    | 0.97 ± 0.08  | 0.89 ± 0.06  |
| <i>cdc42</i>                     | 0.95 ± 0.02 | 0.91 ± 0.02 |   | 0.98 ± 0.02  | 0.92 ± 0.03  | 1.08 ± 0.02 | 1.04 ± 0.02 |    | 1.06 ± 0.02  | 1.04 ± 0.01  |
| <i>cdc51</i>                     | 1.14 ± 0.04 | 1.08 ± 0.05 |   | 1.13 ± 0.06  | 1.08 ± 0.05  | 0.98 ± 0.02 | 0.88 ± 0.02 |    | 0.97 ± 0.04  | 0.89 ± 0.04  |
| <i>cdc6</i>                      | 1.20 ± 0.02 | 1.10 ± 0.05 | * | 1.08 ± 0.03  | 1.06 ± 0.03  | 0.95 ± 0.03 | 0.60 ± 0.02 | *  | 0.87 ± 0.02  | 0.54 ± 0.01  |
| <i>cdc7</i>                      | 1.32 ± 0.12 | 1.09 ± 0.11 | * | 1.07 ± 0.08  | 0.92 ± 0.06  | 1.16 ± 0.07 | 0.97 ± 0.02 | *  | 0.97 ± 0.10  | 0.85 ± 0.02  |
| <i>cdc911l</i>                   | 1.01 ± 0.04 | 1.01 ± 0.01 |   | 1.02 ± 0.02  | 1.01 ± 0.02  | 1.03 ± 0.04 | 1.01 ± 0.02 |    | 0.98 ± 0.03  | 1.00 ± 0.01  |
| <i>cdca1</i>                     | 1.04 ± 0.02 | 1.01 ± 0.03 |   | 1.03 ± 0.03  | 0.98 ± 0.03  | 1.14 ± 0.03 | 0.72 ± 0.02 | *† | 1.05 ± 0.01† | 0.59 ± 0.01† |
| <i>cdca2</i>                     | 1.14 ± 0.05 | 1.16 ± 0.07 |   | 1.13 ± 0.04  | 1.10 ± 0.05  | 1.03 ± 0.04 | 0.83 ± 0.03 | *  | 0.96 ± 0.03  | 0.75 ± 0.02  |
| <i>cdca3</i>                     | 1.19 ± 0.03 | 1.17 ± 0.02 |   | 1.19 ± 0.01  | 1.16 ± 0.01  | 0.82 ± 0.02 | 0.71 ± 0.01 | *  | 0.75 ± 0.01  | 0.67 ± 0.01  |
| <i>cdca7</i>                     | 1.44 ± 0.12 | 1.08 ± 0.06 |   | 1.39 ± 0.10  | 1.15 ± 0.02  | 0.94 ± 0.05 | 0.58 ± 0.02 | †  | 0.81 ± 0.02  | 0.59 ± 0.03  |
| <i>cdk2</i>                      | 1.15 ± 0.03 | 1.04 ± 0.02 | * | 1.19 ± 0.04  | 1.13 ± 0.02  | 0.96 ± 0.03 | 0.65 ± 0.01 |    | 0.93 ± 0.01  | 0.63 ± 0.02  |
| <i>cdk4</i>                      | 1.06 ± 0.01 | 1.01 ± 0.01 | * | 1.09 ± 0.02  | 1.06 ± 0.01  | 0.95 ± 0.01 | 0.86 ± 0.02 | †  | 0.99 ± 0.02  | 0.84 ± 0.02  |
| <i>cdk5</i>                      | 1.01 ± 0.01 | 0.85 ± 0.03 | † | 0.90 ± 0.05  | 0.91 ± 0.05  | 1.02 ± 0.05 | 1.04 ± 0.08 | †  | 0.83 ± 0.03† | 1.18 ± 0.04  |
| <i>cdk6</i>                      | 1.20 ± 0.07 | 1.21 ± 0.12 |   | 1.07 ± 0.13  | 1.20 ± 0.07  | 1.03 ± 0.09 | 0.80 ± 0.05 | *  | 0.72 ± 0.02  | 0.57 ± 0.02  |
| <i>cdk7</i>                      | 0.99 ± 0.01 | 1.00 ± 0.02 |   | 0.99 ± 0.02  | 0.97 ± 0.02  | 0.99 ± 0.02 | 0.98 ± 0.02 |    | 1.03 ± 0.03  | 0.99 ± 0.02  |
| <i>cdkn1a</i>                    | 0.80 ± 0.03 | 0.98 ± 0.07 | † | 0.95 ± 0.04† | 0.90 ± 0.05  | 1.15 ± 0.05 | 1.19 ± 0.02 | *  | 0.95 ± 0.03  | 1.12 ± 0.04  |
| <i>cdkn1b</i>                    | 1.12 ± 0.03 | 1.27 ± 0.03 |   | 1.15 ± 0.04  | 1.19 ± 0.03  | 0.89 ± 0.02 | 0.84 ± 0.02 |    | 0.84 ± 0.02  | 0.85 ± 0.02  |
| <i>cdkn1c</i>                    | 1.08 ± 0.03 | 1.07 ± 0.03 | * | 0.99 ± 0.04  | 1.03 ± 0.02  | 0.98 ± 0.03 | 0.97 ± 0.02 | †  | 1.01 ± 0.01  | 0.90 ± 0.02† |
| <i>cdkn2a</i>                    | 0.92 ± 0.03 | 1.18 ± 0.08 |   | 0.94 ± 0.02  | 1.02 ± 0.07  | 0.94 ± 0.04 | 1.20 ± 0.09 | †  | 1.02 ± 0.04  | 1.02 ± 0.05  |
| <i>cdkn2b</i>                    | 0.84 ± 0.16 | 0.99 ± 0.21 |   | 0.92 ± 0.03  | 1.39 ± 0.18  | 0.58 ± 0.13 | 1.36 ± 0.03 | †  | 1.04 ± 0.16† | 0.95 ± 0.07† |
| <i>cdkn2c</i>                    | 0.92 ± 0.02 | 0.91 ± 0.01 |   | 0.92 ± 0.02  | 0.96 ± 0.02  | 1.27 ± 0.02 | 1.30 ± 0.04 |    | 1.29 ± 0.04  | 1.18 ± 0.07  |
| <i>cgrefl</i>                    | 0.82 ± 0.04 | 0.84 ± 0.04 | * | 0.90 ± 0.03  | 0.91 ± 0.03  | 1.24 ± 0.07 | 1.77 ± 0.04 | *† | 1.53 ± 0.06† | 1.83 ± 0.05  |
| <i>cgrrf1</i>                    | 1.01 ± 0.03 | 1.07 ± 0.03 | * | 1.06 ± 0.01  | 1.14 ± 0.03  | 0.86 ± 0.01 | 0.94 ± 0.04 |    | 0.87 ± 0.01  | 0.95 ± 0.03  |
| <i>chek1</i>                     | 1.10 ± 0.03 | 1.10 ± 0.02 |   | 1.15 ± 0.02  | 1.09 ± 0.04  | 0.94 ± 0.02 | 0.72 ± 0.02 |    | 0.93 ± 0.01  | 0.72 ± 0.05  |
| <i>chek2</i>                     | 1.36 ± 0.05 | 1.21 ± 0.06 | † | 1.03 ± 0.08† | 1.37 ± 0.06  | 0.97 ± 0.04 | 0.83 ± 0.07 |    | 1.03 ± 0.07  | 0.96 ± 0.05  |
| <i>commd5</i>                    | 0.99 ± 0.02 | 1.05 ± 0.03 |   | 0.98 ± 0.01  | 1.01 ± 0.04  | 1.01 ± 0.04 | 0.99 ± 0.03 |    | 1.05 ± 0.03  | 1.03 ± 0.03  |
| <i>cort</i>                      | 1.17 ± 0.05 | 1.06 ± 0.04 |   | 1.05 ± 0.04  | 1.05 ± 0.04  | 0.99 ± 0.03 | 0.91 ± 0.03 | *  | 0.89 ± 0.04  | 0.89 ± 0.01  |
| <i>crk</i>                       | 0.78 ± 0.08 | 1.13 ± 0.10 | † | 0.97 ± 0.08  | 0.81 ± 0.05† | 1.16 ± 0.08 | 1.11 ± 0.19 |    | 0.98 ± 0.12  | 1.01 ± 0.13  |
| <i>csflr</i>                     | 1.31 ± 0.11 | 0.57 ± 0.04 |   | 1.70 ± 0.32  | 0.82 ± 0.17  | 1.58 ± 0.11 | 0.64 ± 0.04 | †  | 0.90 ± 0.10† | 0.83 ± 0.10  |
| <i>csnk1d</i>                    | 1.00 ± 0.03 | 0.96 ± 0.02 | † | 0.93 ± 0.02  | 1.00 ± 0.02  | 1.00 ± 0.01 | 0.97 ± 0.01 | *  | 1.06 ± 0.01  | 1.06 ± 0.02  |
| <i>cspg6</i>                     | 1.07 ± 0.02 | 1.00 ± 0.03 | * | 1.10 ± 0.03  | 1.09 ± 0.05  | 0.98 ± 0.02 | 0.82 ± 0.03 | *  | 0.97 ± 0.01  | 0.74 ± 0.03  |
| <i>ctef</i>                      | 1.10 ± 0.02 | 1.07 ± 0.02 |   | 1.10 ± 0.01  | 1.11 ± 0.01  | 0.93 ± 0.02 | 0.75 ± 0.01 | *  | 0.89 ± 0.01  | 0.70 ± 0.01  |
| <i>cul5</i>                      | 1.17 ± 0.12 | 1.20 ± 0.10 | * | 0.99 ± 0.11  | 1.03 ± 0.03  | 1.12 ± 0.09 | 0.93 ± 0.05 |    | 1.04 ± 0.08  | 0.99 ± 0.08  |
| <i>cwf19l1</i>                   | 1.40 ± 0.08 | 1.04 ± 0.06 | † | 1.08 ± 0.13† | 1.13 ± 0.04  | 0.98 ± 0.05 | 0.86 ± 0.08 | *  | 0.76 ± 0.03  | 0.75 ± 0.08  |
| <i>cwf19l2</i>                   | 1.05 ± 0.04 | 1.09 ± 0.02 |   | 1.11 ± 0.05  | 1.08 ± 0.03  | 0.99 ± 0.03 | 0.88 ± 0.02 | †  | 0.90 ± 0.04  | 0.96 ± 0.02† |
| <i>cxcl1</i>                     | 2.51 ± 0.28 | 1.22 ± 0.44 |   | 2.52 ± 0.24  | 0.70 ± 0.08  | 0.89 ± 0.13 | 0.83 ± 0.19 |    | 0.88 ± 0.19  | 0.82 ± 0.09  |
| <i>d123</i>                      | 1.01 ± 0.03 | 1.04 ± 0.01 |   | 1.01 ± 0.02  | 1.02 ± 0.01  | 0.99 ± 0.02 | 1.01 ± 0.01 |    | 0.99 ± 0.02  | 0.95 ± 0.02  |
| <i>dcc</i>                       | 0.77 ± 0.16 | 1.04 ± 0.18 |   | 0.96 ± 0.10  | 0.92 ± 0.13  | 0.96 ± 0.29 | 1.25 ± 0.22 |    | 1.13 ± 0.18  | 0.92 ± 0.05  |
| <i>ddit3</i>                     | 0.84 ± 0.03 | 0.89 ± 0.02 |   | 0.84 ± 0.01  | 0.88 ± 0.01  | 1.22 ± 0.03 | 1.13 ± 0.02 | *  | 1.38 ± 0.03  | 1.26 ± 0.03  |
| <i>ddx16</i>                     | 1.09 ± 0.03 | 1.19 ± 0.01 | * | 1.13 ± 0.05  | 1.30 ± 0.05  | 0.96 ± 0.01 | 0.92 ± 0.03 | *  | 0.87 ± 0.05  | 0.81 ± 0.02  |
| <i>dup1</i>                      | 0.81 ± 0.03 | 0.90 ± 0.07 |   | 0.89 ± 0.04  | 0.86 ± 0.05  | 1.05 ± 0.05 | 1.62 ± 0.12 | *  | 1.31 ± 0.06  | 2.41 ± 0.09  |
| <i>e2f3</i>                      | 0.98 ± 0.04 | 0.94 ± 0.04 |   | 0.99 ± 0.05  | 0.95 ± 0.02  | 1.10 ± 0.04 | 1.00 ± 0.02 | †  | 1.04 ± 0.03  | 1.06 ± 0.04  |
| <i>e2f5</i>                      | 1.19 ± 0.13 | 1.10 ± 0.09 | * | 1.06 ± 0.07  | 0.90 ± 0.03  | 1.31 ± 0.05 | 0.84 ± 0.04 | *  | 1.12 ± 0.05  | 0.78 ± 0.05  |
| <i>egfr</i>                      | 1.46 ± 0.09 | 1.81 ± 0.09 |   | 1.62 ± 0.09  | 1.94 ± 0.15  | 0.65 ± 0.03 | 0.57 ± 0.02 | *  | 0.57 ± 0.02  | 0.51 ± 0.02  |
| <i>elk1</i>                      | 1.06 ± 0.15 | 1.48 ± 0.46 |   | 0.81 ± 0.02  | 1.18 ± 0.20  | 0.97 ± 0.12 | 1.03 ± 0.13 |    | 0.92 ± 0.09  | 0.99 ± 0.10  |
| <i>erall</i>                     | 1.08 ± 0.07 | 1.11 ± 0.08 | * | 0.88 ± 0.10  | 0.95 ± 0.02  | 0.91 ± 0.05 | 1.03 ± 0.04 | *  | 1.10 ± 0.07  | 1.12 ± 0.11  |
| <i>erbb2</i>                     | 0.95 ± 0.05 | 1.06 ± 0.01 | * | 0.87 ± 0.04  | 0.99 ± 0.03  | 1.00 ± 0.01 | 1.08 ± 0.04 | *  | 0.98 ± 0.03  | 1.00 ± 0.02  |
| <i>erbb3</i>                     | 0.64 ± 0.14 | 0.83 ± 0.14 | * | 0.67 ± 0.09  | 1.51 ± 0.29  | 0.94 ± 0.05 | 0.88 ± 0.10 |    | 1.40 ± 0.11  | 0.93 ± 0.17  |
| <i>ereg</i>                      | 1.17 ± 0.11 | 0.79 ± 0.11 |   | 1.00 ± 0.03  | 0.62 ± 0.15  | 2.25 ± 0.88 | 0.90 ± 0.06 |    | 1.11 ± 0.26  | 1.62 ± 0.48  |
| <i>ets1</i>                      | 0.93 ± 0.04 | 1.05 ± 0.04 |   | 0.96 ± 0.02  | 0.99 ± 0.04  | 0.99 ± 0.03 | 0.93 ± 0.03 | *  | 1.05 ± 0.03  | 1.17 ± 0.13  |
| <i>ets2</i>                      | 1.23 ± 0.03 | 1.01 ± 0.04 | * | 0.99 ± 0.06  | 0.92 ± 0.05  | 1.03 ± 0.12 | 0.91 ± 0.04 |    | 1.10 ± 0.03  | 1.01 ± 0.02  |
| <i>fbxo2</i>                     | 0.99 ± 0.03 | 1.04 ± 0.02 |   | 0.97 ± 0.04  | 1.04 ± 0.02  | 0.96 ± 0.03 | 1.02 ± 0.03 |    | 0.98 ± 0.03  | 0.99 ± 0.02  |
| <i>fgf1</i>                      | 1.07 ± 0.20 | 0.94 ± 0.05 |   | 0.90 ± 0.10  | 1.08 ± 0.16  | 1.06 ± 0.04 | 1.34 ± 0.16 | *  | 1.04 ± 0.20  | 0.79 ± 0.18  |
| <i>fgf2</i>                      | 1.19 ± 0.15 | 1.05 ± 0.07 |   | 1.31 ± 0.08  | 1.08 ± 0.12  | 0.85 ± 0.09 | 0.89 ± 0.10 |    | 0.67 ± 0.07  | 0.82 ± 0.04  |
| <i>fgf3</i>                      | 0.99 ± 0.17 | 1.50 ± 0.17 | * | 0.81 ± 0.06  | 1.06 ± 0.17  | 0.87 ± 0.04 | 1.18 ± 0.13 |    | 1.01 ± 0.04  | 1.06 ± 0.10  |
| <i>fgf4</i>                      | 0.91 ± 0.13 | 1.17 ± 0.35 |   | 0.88 ± 0.15  | 1.18 ± 0.11  | 0.80 ± 0.13 | 0.83 ± 0.21 |    | 0.82 ± 0.16  | 1.03 ± 0.39  |
| <i>fgf5</i>                      | 0.73 ± 0.18 | 1.20 ± 0.46 |   | 0.78 ± 0.15  | 0.95 ± 0.12  | 0.88 ± 0.12 | 0.91 ± 0.18 |    | 0.97 ± 0.19  | 1.08 ± 0.08  |

|                  |             |             |    |              |              |             |             |    |              |              |
|------------------|-------------|-------------|----|--------------|--------------|-------------|-------------|----|--------------|--------------|
| <i>fgf7</i>      | 1.80 ± 0.30 | 1.01 ± 0.36 | *  | 0.86 ± 0.30  | 0.65 ± 0.22  | 2.22 ± 1.06 | 1.61 ± 1.04 |    | 1.83 ± 1.05  | 0.67 ± 0.24  |
| <i>fgf9</i>      | 0.83 ± 0.20 | 1.15 ± 0.17 |    | 0.91 ± 0.08  | 0.87 ± 0.16  | 1.46 ± 0.11 | 0.52 ± 0.11 | †  | 1.08 ± 0.24  | 0.89 ± 0.08† |
| <i>fgr</i>       | 1.41 ± 0.55 | 1.28 ± 0.22 |    | 1.51 ± 0.31  | 1.29 ± 0.26  | 0.92 ± 0.04 | 1.00 ± 0.06 |    | 1.08 ± 0.12  | 1.03 ± 0.17  |
| <i>figf</i>      | 1.16 ± 0.04 | 1.11 ± 0.05 | *  | 0.99 ± 0.08  | 0.87 ± 0.05  | 1.12 ± 0.10 | 0.98 ± 0.04 | *  | 0.99 ± 0.07  | 0.82 ± 0.03  |
| <i>fos</i>       | 0.88 ± 0.17 | 1.17 ± 0.09 | *  | 0.79 ± 0.14  | 0.65 ± 0.12  | 0.66 ± 0.28 | 0.83 ± 0.10 | *  | 0.90 ± 0.16  | 1.24 ± 0.09  |
| <i>foxg1</i>     | 0.99 ± 0.02 | 1.08 ± 0.05 |    | 0.96 ± 0.04  | 1.00 ± 0.06  | 1.00 ± 0.04 | 0.98 ± 0.04 |    | 0.99 ± 0.03  | 0.94 ± 0.02  |
| <i>frap1</i>     | 1.14 ± 0.08 | 1.07 ± 0.05 |    | 1.06 ± 0.04  | 1.07 ± 0.02  | 0.97 ± 0.02 | 0.90 ± 0.02 |    | 0.92 ± 0.02  | 0.97 ± 0.06  |
| <i>fyn</i>       | 1.07 ± 0.13 | 1.08 ± 0.01 |    | 0.99 ± 0.09  | 0.93 ± 0.04  | 0.90 ± 0.03 | 0.99 ± 0.05 | *  | 1.07 ± 0.02  | 1.04 ± 0.01  |
| <i>fzr1</i>      | 1.04 ± 0.05 | 1.07 ± 0.07 |    | 1.02 ± 0.03  | 1.10 ± 0.03  | 0.96 ± 0.03 | 1.07 ± 0.04 |    | 0.95 ± 0.04  | 1.03 ± 0.05  |
| <i>gadd45a</i>   | 0.80 ± 0.03 | 0.71 ± 0.03 | *  | 0.86 ± 0.04  | 0.81 ± 0.02  | 1.24 ± 0.06 | 1.57 ± 0.05 | *  | 1.47 ± 0.08  | 1.70 ± 0.05  |
| <i>gak</i>       | 0.94 ± 0.01 | 0.97 ± 0.03 |    | 0.93 ± 0.04  | 0.96 ± 0.04  | 0.98 ± 0.03 | 1.09 ± 0.03 |    | 0.99 ± 0.05  | 1.07 ± 0.02  |
| <i>gsk3b</i>     | 0.98 ± 0.05 | 0.93 ± 0.03 |    | 0.90 ± 0.05  | 0.91 ± 0.02  | 1.06 ± 0.02 | 1.06 ± 0.03 |    | 1.06 ± 0.03  | 1.12 ± 0.03  |
| <i>gspt1</i>     | 0.97 ± 0.02 | 0.93 ± 0.02 |    | 0.97 ± 0.02  | 0.96 ± 0.02  | 1.06 ± 0.02 | 1.07 ± 0.03 | †  | 1.09 ± 0.02  | 1.01 ± 0.02  |
| <i>hdac3</i>     | 1.02 ± 0.02 | 1.00 ± 0.02 |    | 0.99 ± 0.02  | 1.03 ± 0.02  | 0.98 ± 0.02 | 0.97 ± 0.02 | *  | 1.03 ± 0.02  | 0.99 ± 0.02  |
| <i>hdac7a</i>    | 1.40 ± 0.11 | 1.05 ± 0.12 |    | 1.33 ± 0.10  | 0.85 ± 0.04  | 1.14 ± 0.05 | 0.99 ± 0.06 | *  | 0.92 ± 0.04  | 0.84 ± 0.03  |
| <i>hirip5</i>    | 1.34 ± 0.24 | 1.06 ± 0.09 |    | 1.25 ± 0.28  | 0.76 ± 0.22  | 0.88 ± 0.09 | 1.06 ± 0.08 | *† | 0.45 ± 0.07† | 0.93 ± 0.07  |
| <i>hspa8</i>     | 0.96 ± 0.01 | 0.96 ± 0.03 | †  | 0.87 ± 0.01† | 1.06 ± 0.01† | 0.99 ± 0.01 | 1.04 ± 0.02 | *† | 1.06 ± 0.02† | 1.04 ± 0.03  |
| <i>id2</i>       | 0.91 ± 0.02 | 0.96 ± 0.01 | *  | 0.97 ± 0.01  | 1.08 ± 0.02  | 0.99 ± 0.01 | 1.09 ± 0.01 | *  | 1.05 ± 0.02  | 1.20 ± 0.01  |
| <i>igf2</i>      | 1.09 ± 0.02 | 1.09 ± 0.04 | *  | 0.82 ± 0.12  | 1.02 ± 0.05  | 1.07 ± 0.04 | 0.95 ± 0.04 | *  | 0.94 ± 0.05  | 0.93 ± 0.03  |
| <i>il18</i>      | 1.20 ± 0.02 | 1.21 ± 0.02 | *  | 1.31 ± 0.04  | 1.47 ± 0.04  | 0.78 ± 0.02 | 0.74 ± 0.01 | *  | 0.74 ± 0.02  | 0.69 ± 0.01  |
| <i>il1a</i>      | 0.87 ± 0.14 | 1.20 ± 0.24 |    | 0.84 ± 0.14  | 0.85 ± 0.12  | 1.06 ± 0.14 | 0.97 ± 0.13 |    | 0.91 ± 0.11  | 1.03 ± 0.14  |
| <i>il1b</i>      | 0.88 ± 0.06 | 1.11 ± 0.05 | †  | 1.17 ± 0.11† | 0.71 ± 0.10† | 1.03 ± 0.13 | 0.89 ± 0.11 |    | 0.87 ± 0.10  | 0.92 ± 0.09  |
| <i>ilkap</i>     | 1.15 ± 0.03 | 1.10 ± 0.02 |    | 1.13 ± 0.03  | 1.03 ± 0.03  | 0.95 ± 0.02 | 0.86 ± 0.04 |    | 0.96 ± 0.03  | 0.82 ± 0.02  |
| <i>inha</i>      | 0.99 ± 0.03 | 1.00 ± 0.02 |    | 0.98 ± 0.02  | 0.96 ± 0.05  | 0.91 ± 0.04 | 1.15 ± 0.04 |    | 0.97 ± 0.04  | 1.12 ± 0.05  |
| <i>itgb1</i>     | 0.75 ± 0.09 | 0.68 ± 0.08 |    | 0.74 ± 0.09  | 0.63 ± 0.03  | 1.14 ± 0.04 | 1.23 ± 0.10 |    | 1.13 ± 0.07  | 1.39 ± 0.10  |
| <i>jag2</i>      | 0.87 ± 0.08 | 0.84 ± 0.03 |    | 0.83 ± 0.06  | 0.83 ± 0.02  | 1.10 ± 0.04 | 1.07 ± 0.03 |    | 1.08 ± 0.05  | 1.17 ± 0.04  |
| <i>jun</i>       | 0.79 ± 0.03 | 0.71 ± 0.02 | *  | 0.90 ± 0.02  | 0.74 ± 0.03  | 1.07 ± 0.02 | 1.90 ± 0.02 | *† | 1.15 ± 0.03  | 2.19 ± 0.02† |
| <i>junb</i>      | 0.56 ± 0.02 | 0.58 ± 0.03 | *† | 0.67 ± 0.02† | 0.60 ± 0.02  | 1.22 ± 0.06 | 1.24 ± 0.03 | *  | 1.54 ± 0.09  | 1.37 ± 0.05  |
| <i>jund</i>      | 0.85 ± 0.01 | 0.78 ± 0.02 | *  | 0.93 ± 0.01  | 0.90 ± 0.02  | 1.06 ± 0.03 | 1.42 ± 0.03 | *  | 1.20 ± 0.04  | 1.62 ± 0.04  |
| <i>kras2</i>     | 0.89 ± 0.02 | 0.84 ± 0.02 |    | 0.90 ± 0.03  | 0.84 ± 0.05  | 1.17 ± 0.03 | 1.07 ± 0.03 |    | 1.15 ± 0.04  | 1.09 ± 0.03  |
| <i>loc288698</i> | 1.10 ± 0.03 | 1.08 ± 0.03 |    | 1.10 ± 0.05  | 1.18 ± 0.03  | 0.97 ± 0.02 | 0.84 ± 0.02 |    | 0.95 ± 0.02  | 0.81 ± 0.02  |
| <i>lyn</i>       | 1.24 ± 0.06 | 1.19 ± 0.04 | *  | 1.39 ± 0.05  | 1.40 ± 0.03  | 0.82 ± 0.04 | 0.76 ± 0.03 |    | 0.77 ± 0.06  | 0.75 ± 0.03  |
| <i>maf</i>       | 1.13 ± 0.07 | 1.17 ± 0.14 |    | 1.18 ± 0.09  | 1.04 ± 0.13  | 0.84 ± 0.10 | 0.92 ± 0.07 |    | 0.82 ± 0.05  | 0.84 ± 0.03  |
| <i>mafk</i>      | 1.01 ± 0.09 | 0.71 ± 0.05 | †  | 0.89 ± 0.07  | 0.84 ± 0.03  | 1.12 ± 0.16 | 0.98 ± 0.06 | *  | 1.22 ± 0.11  | 1.29 ± 0.05  |
| <i>map3k8</i>    | 1.26 ± 0.21 | 1.36 ± 0.16 |    | 1.34 ± 0.14  | 1.40 ± 0.10  | 0.99 ± 0.06 | 0.86 ± 0.03 | †  | 0.79 ± 0.06† | 1.07 ± 0.09† |
| <i>mapk1</i>     | 0.95 ± 0.02 | 0.92 ± 0.03 |    | 0.94 ± 0.01  | 0.90 ± 0.04  | 1.09 ± 0.03 | 1.14 ± 0.04 |    | 1.12 ± 0.04  | 1.11 ± 0.04  |
| <i>mapk12</i>    | 0.98 ± 0.05 | 0.85 ± 0.04 |    | 0.99 ± 0.05  | 0.95 ± 0.03  | 1.09 ± 0.02 | 0.99 ± 0.02 | *  | 1.15 ± 0.07  | 1.09 ± 0.02  |
| <i>mapk13</i>    | 1.03 ± 0.04 | 1.04 ± 0.06 | †  | 1.25 ± 0.08† | 0.87 ± 0.10  | 0.96 ± 0.06 | 0.83 ± 0.07 | *  | 1.31 ± 0.18  | 1.00 ± 0.07  |
| <i>mapk3</i>     | 1.00 ± 0.03 | 0.89 ± 0.04 |    | 0.96 ± 0.05  | 0.92 ± 0.03  | 1.02 ± 0.05 | 1.04 ± 0.05 |    | 1.00 ± 0.03  | 1.05 ± 0.04  |
| <i>mapk4</i>     | 0.94 ± 0.02 | 0.96 ± 0.04 |    | 0.97 ± 0.02  | 0.93 ± 0.02  | 1.19 ± 0.09 | 1.06 ± 0.05 |    | 1.09 ± 0.01  | 1.02 ± 0.02  |
| <i>mapk6</i>     | 0.95 ± 0.03 | 0.95 ± 0.02 |    | 0.94 ± 0.03  | 0.94 ± 0.01  | 1.08 ± 0.03 | 1.07 ± 0.02 |    | 1.10 ± 0.03  | 1.11 ± 0.03  |
| <i>mas1</i>      | 1.03 ± 0.08 | 1.09 ± 0.04 |    | 1.07 ± 0.09  | 1.06 ± 0.04  | 0.97 ± 0.07 | 0.89 ± 0.09 |    | 0.88 ± 0.05  | 0.88 ± 0.03  |
| <i>mcm5</i>      | 1.13 ± 0.03 | 1.08 ± 0.02 | *  | 1.00 ± 0.02  | 1.05 ± 0.03  | 0.96 ± 0.04 | 0.77 ± 0.02 |    | 0.94 ± 0.04  | 0.77 ± 0.03  |
| <i>mcmd6</i>     | 1.30 ± 0.05 | 1.31 ± 0.05 | *† | 1.07 ± 0.04† | 1.25 ± 0.04  | 0.89 ± 0.02 | 0.65 ± 0.02 | *† | 0.90 ± 0.03  | 0.55 ± 0.02† |
| <i>mdk</i>       | 1.02 ± 0.02 | 0.94 ± 0.01 |    | 1.05 ± 0.04  | 0.92 ± 0.02  | 1.06 ± 0.03 | 1.01 ± 0.02 | †  | 1.01 ± 0.01  | 1.09 ± 0.01† |
| <i>merik</i>     | 1.56 ± 0.47 | 1.40 ± 0.18 |    | 1.05 ± 0.23  | 1.04 ± 0.12  | 0.70 ± 0.11 | 1.25 ± 0.18 |    | 0.81 ± 0.11  | 1.22 ± 0.25  |
| <i>met</i>       | 0.65 ± 0.08 | 1.31 ± 0.18 |    | 1.10 ± 0.18  | 1.28 ± 0.21  | 0.88 ± 0.14 | 0.96 ± 0.03 |    | 1.00 ± 0.05  | 1.02 ± 0.02  |
| <i>mid1</i>      | 1.14 ± 0.06 | 1.05 ± 0.29 |    | 1.11 ± 0.28  | 1.10 ± 0.20  | 0.90 ± 0.22 | 1.00 ± 0.22 |    | 0.74 ± 0.08  | 0.94 ± 0.27  |
| <i>mnat1</i>     | 0.96 ± 0.02 | 0.99 ± 0.01 |    | 0.97 ± 0.02  | 0.98 ± 0.01  | 1.01 ± 0.02 | 1.02 ± 0.01 |    | 1.02 ± 0.02  | 1.00 ± 0.01  |
| <i>mos</i>       | 1.01 ± 0.12 | 0.90 ± 0.18 |    | 1.01 ± 0.07  | 0.97 ± 0.07  | 0.94 ± 0.14 | 0.90 ± 0.09 | *  | 1.27 ± 0.13  | 1.04 ± 0.13  |
| <i>mre11a</i>    | 0.90 ± 0.04 | 0.96 ± 0.08 |    | 1.01 ± 0.03  | 0.97 ± 0.03  | 1.17 ± 0.06 | 1.02 ± 0.09 |    | 1.14 ± 0.07  | 0.87 ± 0.05  |
| <i>msh2</i>      | 1.17 ± 0.02 | 1.18 ± 0.05 | *  | 1.13 ± 0.02  | 1.11 ± 0.02  | 0.93 ± 0.01 | 0.77 ± 0.02 | *  | 0.90 ± 0.01  | 0.71 ± 0.01  |
| <i>myc</i>       | 1.39 ± 0.15 | 0.97 ± 0.03 |    | 1.45 ± 0.12  | 0.94 ± 0.03  | 1.31 ± 0.11 | 0.44 ± 0.01 | †  | 1.09 ± 0.09  | 0.61 ± 0.03† |
| <i>mycl1</i>     | 0.89 ± 0.04 | 1.09 ± 0.09 |    | 0.94 ± 0.04  | 1.02 ± 0.09  | 1.07 ± 0.13 | 1.06 ± 0.10 |    | 1.01 ± 0.04  | 1.01 ± 0.07  |
| <i>mycn</i>      | 1.10 ± 0.04 | 1.14 ± 0.13 | *  | 0.90 ± 0.11  | 0.72 ± 0.15  | 0.90 ± 0.12 | 1.04 ± 0.15 |    | 1.32 ± 0.20  | 0.94 ± 0.10  |
| <i>mycs</i>      | 1.02 ± 0.01 | 1.02 ± 0.03 | *  | 1.05 ± 0.03  | 1.12 ± 0.01  | 0.89 ± 0.06 | 0.94 ± 0.05 |    | 0.95 ± 0.01  | 0.93 ± 0.04  |
| <i>n-myc</i>     | 0.77 ± 0.17 | 0.60 ± 0.20 | *† | 1.19 ± 0.15† | 2.19 ± 0.27† | 0.72 ± 0.12 | 1.00 ± 0.15 | †  | 1.31 ± 0.17† | 0.78 ± 0.13  |
| <i>nbl1</i>      | 0.98 ± 0.03 | 1.01 ± 0.04 |    | 0.97 ± 0.02  | 1.00 ± 0.04  | 0.96 ± 0.03 | 1.04 ± 0.04 |    | 1.00 ± 0.01  | 1.08 ± 0.02  |

|                 |             |             |   |              |              |             |             |    |              |              |
|-----------------|-------------|-------------|---|--------------|--------------|-------------|-------------|----|--------------|--------------|
| <i>nbn</i>      | 0.99 ± 0.01 | 0.89 ± 0.02 |   | 1.00 ± 0.02  | 0.90 ± 0.02  | 1.22 ± 0.03 | 1.00 ± 0.02 |    | 1.21 ± 0.04  | 0.97 ± 0.02  |
| <i>nedd4a</i>   | 1.06 ± 0.03 | 0.97 ± 0.04 |   | 1.05 ± 0.04  | 0.97 ± 0.05  | 0.98 ± 0.03 | 0.89 ± 0.05 |    | 1.01 ± 0.05  | 0.89 ± 0.05  |
| <i>nedd8</i>    | 1.01 ± 0.01 | 1.01 ± 0.01 |   | 1.00 ± 0.01  | 1.02 ± 0.01  | 0.95 ± 0.01 | 1.02 ± 0.01 |    | 0.95 ± 0.01  | 1.02 ± 0.02  |
| <i>nek2</i>     | 1.09 ± 0.03 | 1.12 ± 0.06 | * | 0.98 ± 0.07  | 1.01 ± 0.03  | 1.01 ± 0.09 | 0.89 ± 0.04 |    | 0.96 ± 0.05  | 0.81 ± 0.04  |
| <i>nf2</i>      | 0.98 ± 0.12 | 0.82 ± 0.07 |   | 1.00 ± 0.14  | 0.84 ± 0.10  | 1.15 ± 0.10 | 1.04 ± 0.11 | †  | 1.06 ± 0.13  | 1.50 ± 0.12† |
| <i>notch2</i>   | 1.05 ± 0.09 | 1.06 ± 0.06 | * | 0.95 ± 0.04  | 0.96 ± 0.03  | 1.20 ± 0.09 | 1.04 ± 0.08 |    | 1.04 ± 0.03  | 0.97 ± 0.07  |
| <i>npm1</i>     | 0.99 ± 0.02 | 0.99 ± 0.01 | * | 1.04 ± 0.02  | 1.04 ± 0.02  | 1.01 ± 0.01 | 0.89 ± 0.02 |    | 1.03 ± 0.03  | 0.86 ± 0.02  |
| <i>nr2f6</i>    | 0.98 ± 0.04 | 1.04 ± 0.02 |   | 0.98 ± 0.01  | 1.07 ± 0.02  | 1.05 ± 0.02 | 0.97 ± 0.03 |    | 1.07 ± 0.02  | 0.96 ± 0.01  |
| <i>nras</i>     | 0.86 ± 0.02 | 0.84 ± 0.02 | * | 0.89 ± 0.03  | 0.93 ± 0.02  | 1.05 ± 0.02 | 1.09 ± 0.03 | *  | 1.15 ± 0.03  | 1.17 ± 0.03  |
| <i>nucks</i>    | 1.11 ± 0.09 | 1.09 ± 0.04 |   | 1.14 ± 0.11  | 1.09 ± 0.04  | 0.92 ± 0.06 | 0.90 ± 0.06 |    | 0.89 ± 0.06  | 0.89 ± 0.07  |
| <i>pal31</i>    | 1.08 ± 0.04 | 1.01 ± 0.02 |   | 1.01 ± 0.05  | 1.00 ± 0.08  | 1.00 ± 0.05 | 0.89 ± 0.08 |    | 1.09 ± 0.07  | 0.88 ± 0.08  |
| <i>par3</i>     | 1.00 ± 0.04 | 0.95 ± 0.03 |   | 1.00 ± 0.03  | 0.90 ± 0.03  | 1.05 ± 0.03 | 1.02 ± 0.02 |    | 1.04 ± 0.01  | 1.03 ± 0.03  |
| <i>park2</i>    | 1.07 ± 0.05 | 1.01 ± 0.05 |   | 0.98 ± 0.02  | 1.03 ± 0.04  | 1.00 ± 0.06 | 1.02 ± 0.04 |    | 1.04 ± 0.05  | 1.06 ± 0.05  |
| <i>pbef1</i>    | 0.87 ± 0.01 | 0.89 ± 0.02 | * | 0.93 ± 0.02  | 0.98 ± 0.01  | 1.09 ± 0.03 | 1.29 ± 0.03 | *  | 1.14 ± 0.03  | 1.36 ± 0.01  |
| <i>pcm1</i>     | 1.33 ± 0.04 | 1.18 ± 0.03 |   | 1.37 ± 0.05  | 1.22 ± 0.04  | 0.89 ± 0.01 | 0.74 ± 0.02 | †  | 0.83 ± 0.02† | 0.75 ± 0.01  |
| <i>pdgfa</i>    | 1.01 ± 0.02 | 1.10 ± 0.04 |   | 1.04 ± 0.04  | 1.17 ± 0.04  | 0.81 ± 0.03 | 0.95 ± 0.01 | *  | 0.88 ± 0.02  | 1.00 ± 0.03  |
| <i>pdgfb</i>    | 0.94 ± 0.11 | 1.11 ± 0.21 |   | 0.91 ± 0.18  | 1.07 ± 0.17  | 0.80 ± 0.09 | 1.27 ± 0.19 |    | 0.95 ± 0.24  | 1.28 ± 0.35  |
| <i>pdgfc</i>    | 1.04 ± 0.27 | 1.11 ± 0.17 |   | 1.89 ± 0.81  | 0.97 ± 0.22  | 1.16 ± 0.14 | 0.70 ± 0.11 |    | 0.90 ± 0.18  | 0.72 ± 0.04  |
| <i>pgf</i>      | 1.43 ± 0.04 | 1.65 ± 0.04 | * | 1.29 ± 0.03  | 1.46 ± 0.02  | 0.74 ± 0.03 | 0.71 ± 0.01 | *† | 0.74 ± 0.02  | 0.62 ± 0.01† |
| <i>pglyrp1</i>  | 0.99 ± 0.03 | 1.01 ± 0.02 |   | 1.01 ± 0.01  | 1.01 ± 0.02  | 1.00 ± 0.02 | 1.02 ± 0.01 |    | 1.00 ± 0.02  | 1.00 ± 0.01  |
| <i>pkcbbp15</i> | 1.06 ± 0.04 | 1.12 ± 0.03 |   | 1.03 ± 0.02  | 1.14 ± 0.03  | 0.85 ± 0.04 | 0.97 ± 0.04 |    | 0.88 ± 0.03  | 0.94 ± 0.03  |
| <i>pkd1</i>     | 1.08 ± 0.04 | 1.02 ± 0.03 |   | 1.03 ± 0.01  | 1.02 ± 0.03  | 0.96 ± 0.02 | 0.98 ± 0.02 | *  | 0.93 ± 0.03  | 0.90 ± 0.04  |
| <i>plagl1</i>   | 2.22 ± 0.37 | 0.60 ± 0.09 |   | 1.97 ± 0.29  | 0.61 ± 0.11  | 2.00 ± 0.30 | 0.47 ± 0.04 | †  | 1.14 ± 0.17† | 0.62 ± 0.04  |
| <i>plcb1</i>    | 0.98 ± 0.12 | 1.37 ± 0.27 |   | 1.36 ± 0.23  | 1.10 ± 0.14  | 0.85 ± 0.05 | 0.99 ± 0.15 |    | 0.72 ± 0.08  | 1.20 ± 0.16  |
| <i>plk1</i>     | 1.09 ± 0.03 | 1.12 ± 0.03 |   | 1.05 ± 0.03  | 1.07 ± 0.03  | 0.98 ± 0.03 | 0.85 ± 0.03 |    | 0.91 ± 0.02  | 0.73 ± 0.02  |
| <i>plk2</i>     | 0.20 ± 0.01 | 0.17 ± 0.01 | * | 0.24 ± 0.01  | 0.22 ± 0.01  | 1.89 ± 0.06 | 2.75 ± 0.14 | *  | 2.33 ± 0.07  | 3.26 ± 0.10  |
| <i>plk3</i>     | 0.65 ± 0.04 | 0.86 ± 0.08 |   | 0.79 ± 0.10  | 1.03 ± 0.14  | 1.02 ± 0.08 | 1.23 ± 0.09 | †  | 1.28 ± 0.10  | 1.10 ± 0.08  |
| <i>pmp22</i>    | 0.54 ± 0.02 | 0.54 ± 0.03 |   | 0.59 ± 0.03  | 0.53 ± 0.03  | 1.46 ± 0.05 | 2.22 ± 0.04 | *† | 1.62 ± 0.06† | 3.03 ± 0.04† |
| <i>ppm1g</i>    | 0.98 ± 0.04 | 1.00 ± 0.03 |   | 0.93 ± 0.03  | 1.03 ± 0.02  | 1.07 ± 0.05 | 0.95 ± 0.04 |    | 1.06 ± 0.04  | 0.92 ± 0.03  |
| <i>ppp2ca</i>   | 0.98 ± 0.02 | 0.94 ± 0.02 | † | 0.94 ± 0.02  | 0.99 ± 0.01† | 1.05 ± 0.01 | 1.09 ± 0.03 | †  | 1.12 ± 0.02† | 1.07 ± 0.01  |
| <i>ppp3ca</i>   | 0.96 ± 0.02 | 0.86 ± 0.03 |   | 1.01 ± 0.04  | 0.85 ± 0.04  | 1.04 ± 0.03 | 1.10 ± 0.04 | *† | 1.07 ± 0.02  | 1.26 ± 0.01† |
| <i>ppp6c</i>    | 0.92 ± 0.03 | 0.92 ± 0.03 |   | 0.91 ± 0.03  | 0.91 ± 0.03  | 1.03 ± 0.02 | 1.05 ± 0.02 |    | 1.11 ± 0.03  | 1.03 ± 0.04  |
| <i>prok1</i>    | 1.05 ± 0.03 | 1.00 ± 0.02 |   | 0.94 ± 0.03  | 0.96 ± 0.08  | 1.10 ± 0.06 | 1.00 ± 0.03 |    | 1.03 ± 0.01  | 1.04 ± 0.05  |
| <i>psmd1</i>    | 0.98 ± 0.01 | 0.93 ± 0.01 |   | 0.98 ± 0.01  | 0.96 ± 0.02  | 1.01 ± 0.01 | 1.03 ± 0.01 |    | 1.01 ± 0.01  | 1.03 ± 0.01  |
| <i>pten</i>     | 0.99 ± 0.06 | 0.95 ± 0.03 |   | 0.99 ± 0.08  | 0.90 ± 0.03  | 1.03 ± 0.03 | 1.05 ± 0.04 | †  | 0.97 ± 0.04  | 1.14 ± 0.05  |
| <i>ptgds</i>    | 1.15 ± 0.08 | 1.13 ± 0.03 | * | 0.91 ± 0.05  | 0.95 ± 0.06  | 1.07 ± 0.10 | 1.02 ± 0.04 |    | 0.94 ± 0.05  | 1.03 ± 0.04  |
| <i>ptgs2</i>    | 1.22 ± 0.21 | 1.15 ± 0.15 |   | 0.82 ± 0.12  | 1.27 ± 0.18  | 1.22 ± 0.17 | 0.94 ± 0.18 | †  | 0.85 ± 0.09  | 1.27 ± 0.25  |
| <i>ptn</i>      | 0.86 ± 0.03 | 0.72 ± 0.02 | * | 0.90 ± 0.03  | 0.79 ± 0.01  | 1.31 ± 0.04 | 2.07 ± 0.07 | *† | 1.17 ± 0.05  | 1.56 ± 0.06† |
| <i>ptg1</i>     | 1.19 ± 0.01 | 1.25 ± 0.01 | * | 1.18 ± 0.01  | 1.21 ± 0.01  | 0.77 ± 0.01 | 0.83 ± 0.01 | *  | 0.68 ± 0.01  | 0.74 ± 0.01  |
| <i>rad50</i>    | 1.24 ± 0.10 | 1.28 ± 0.15 | * | 1.07 ± 0.03  | 1.00 ± 0.05  | 0.95 ± 0.06 | 0.78 ± 0.05 |    | 0.92 ± 0.04  | 0.79 ± 0.03  |
| <i>rad9</i>     | 1.02 ± 0.04 | 1.00 ± 0.07 |   | 0.98 ± 0.04  | 1.07 ± 0.05  | 1.01 ± 0.03 | 0.93 ± 0.04 |    | 1.08 ± 0.06  | 1.01 ± 0.05  |
| <i>raf1</i>     | 1.11 ± 0.01 | 1.10 ± 0.06 | * | 0.93 ± 0.06  | 1.09 ± 0.05  | 0.91 ± 0.05 | 0.99 ± 0.01 | †  | 0.97 ± 0.05  | 0.89 ± 0.03  |
| <i>ran</i>      | 0.97 ± 0.02 | 0.98 ± 0.02 |   | 0.98 ± 0.01  | 1.01 ± 0.01  | 1.06 ± 0.02 | 0.98 ± 0.02 |    | 1.08 ± 0.03  | 0.98 ± 0.02  |
| <i>rbl1</i>     | 1.09 ± 0.02 | 1.06 ± 0.03 |   | 1.11 ± 0.03  | 1.10 ± 0.02  | 0.95 ± 0.02 | 0.87 ± 0.02 |    | 0.93 ± 0.02  | 0.85 ± 0.04  |
| <i>rbl2</i>     | 1.26 ± 0.01 | 1.24 ± 0.03 | * | 1.23 ± 0.03  | 1.16 ± 0.04  | 0.85 ± 0.01 | 0.89 ± 0.03 | *† | 0.76 ± 0.02† | 0.90 ± 0.02  |
| <i>ret</i>      | 0.48 ± 0.02 | 0.50 ± 0.01 | * | 0.51 ± 0.01  | 0.52 ± 0.01  | 1.72 ± 0.05 | 1.78 ± 0.03 | *  | 1.59 ± 0.04  | 1.55 ± 0.03  |
| <i>rgs2</i>     | 0.72 ± 0.05 | 0.79 ± 0.07 | * | 1.02 ± 0.07  | 0.94 ± 0.10  | 1.26 ± 0.16 | 2.45 ± 0.32 |    | 1.05 ± 0.11  | 2.78 ± 0.22  |
| <i>ros1</i>     | 1.09 ± 0.23 | 1.50 ± 0.24 |   | 1.02 ± 0.19  | 1.58 ± 0.28  | 1.15 ± 0.36 | 1.29 ± 0.09 | *  | 0.65 ± 0.02  | 0.81 ± 0.05  |
| <i>rps4x</i>    | 0.99 ± 0.01 | 1.01 ± 0.01 |   | 1.00 ± 0.02  | 1.01 ± 0.01  | 1.01 ± 0.01 | 0.94 ± 0.02 |    | 1.02 ± 0.02  | 0.97 ± 0.02  |
| <i>s100a6</i>   | 0.71 ± 0.01 | 0.57 ± 0.01 | † | 0.73 ± 0.01  | 0.54 ± 0.01  | 1.92 ± 0.05 | 1.31 ± 0.04 | *  | 2.00 ± 0.05  | 1.43 ± 0.04  |
| <i>sfrs5</i>    | 1.21 ± 0.07 | 1.02 ± 0.02 | † | 1.08 ± 0.05  | 1.10 ± 0.02  | 0.90 ± 0.06 | 0.94 ± 0.04 |    | 0.84 ± 0.07  | 0.84 ± 0.04  |
| <i>siah2</i>    | 0.93 ± 0.05 | 1.00 ± 0.05 | † | 1.10 ± 0.05† | 0.96 ± 0.06  | 1.04 ± 0.05 | 0.94 ± 0.07 |    | 1.02 ± 0.03  | 1.02 ± 0.06  |
| <i>sirt2</i>    | 1.02 ± 0.02 | 0.97 ± 0.04 |   | 0.99 ± 0.03  | 0.99 ± 0.03  | 1.14 ± 0.11 | 1.10 ± 0.03 | *  | 0.89 ± 0.02  | 0.95 ± 0.04  |
| <i>slc12a4</i>  | 0.92 ± 0.03 | 0.85 ± 0.02 | * | 0.97 ± 0.02  | 0.92 ± 0.02  | 1.00 ± 0.03 | 1.06 ± 0.03 | *  | 1.07 ± 0.03  | 1.21 ± 0.03  |
| <i>snai1</i>    | 0.97 ± 0.02 | 0.99 ± 0.02 |   | 0.96 ± 0.03  | 0.98 ± 0.02  | 0.98 ± 0.02 | 1.04 ± 0.03 |    | 0.98 ± 0.01  | 1.07 ± 0.02  |
| <i>socs1</i>    | 0.88 ± 0.07 | 1.04 ± 0.04 |   | 0.91 ± 0.06  | 1.03 ± 0.03  | 1.01 ± 0.07 | 0.98 ± 0.05 |    | 1.00 ± 0.05  | 0.96 ± 0.05  |
| <i>spag5</i>    | 1.08 ± 0.02 | 1.08 ± 0.02 | * | 1.12 ± 0.02  | 1.11 ± 0.01  | 0.96 ± 0.01 | 0.80 ± 0.01 | *  | 0.89 ± 0.01  | 0.75 ± 0.01  |
| <i>src</i>      | 0.83 ± 0.05 | 1.08 ± 0.03 |   | 0.99 ± 0.08  | 0.97 ± 0.06  | 0.91 ± 0.04 | 1.10 ± 0.09 |    | 1.08 ± 0.08  | 1.05 ± 0.04  |

|               |             |             |   |             |              |             |             |    |              |              |
|---------------|-------------|-------------|---|-------------|--------------|-------------|-------------|----|--------------|--------------|
| <i>stag3</i>  | 0.84 ± 0.16 | 1.07 ± 0.15 |   | 0.94 ± 0.16 | 1.11 ± 0.12  | 0.92 ± 0.11 | 1.02 ± 0.07 | *  | 1.22 ± 0.13  | 1.14 ± 0.13  |
| <i>stk6</i>   | 0.99 ± 0.03 | 1.11 ± 0.01 |   | 1.02 ± 0.01 | 1.16 ± 0.02  | 0.95 ± 0.04 | 0.88 ± 0.04 | *  | 0.91 ± 0.02  | 0.79 ± 0.03  |
| <i>tacc1a</i> | 1.07 ± 0.04 | 1.04 ± 0.07 |   | 1.01 ± 0.05 | 1.02 ± 0.06  | 1.03 ± 0.05 | 0.99 ± 0.04 |    | 1.06 ± 0.05  | 0.91 ± 0.06  |
| <i>tcfl9</i>  | 1.14 ± 0.02 | 1.07 ± 0.02 | * | 1.12 ± 0.01 | 1.01 ± 0.01  | 0.96 ± 0.02 | 0.76 ± 0.02 | *  | 0.92 ± 0.01  | 0.69 ± 0.01  |
| <i>tgfa</i>   | 1.20 ± 0.06 | 1.16 ± 0.10 | * | 0.98 ± 0.07 | 0.96 ± 0.05  | 1.07 ± 0.08 | 0.85 ± 0.03 | †  | 0.96 ± 0.04  | 1.28 ± 0.17† |
| <i>tgfb1</i>  | 0.84 ± 0.08 | 1.11 ± 0.12 |   | 0.78 ± 0.10 | 1.06 ± 0.06  | 1.58 ± 0.28 | 1.22 ± 0.18 | *† | 0.89 ± 0.11† | 1.08 ± 0.07  |
| <i>tgfb2</i>  | 1.18 ± 0.24 | 1.07 ± 0.17 |   | 1.23 ± 0.33 | 0.92 ± 0.18  | 0.65 ± 0.17 | 1.35 ± 0.17 | †  | 1.00 ± 0.12  | 0.91 ± 0.12  |
| <i>tgfb3</i>  | 1.00 ± 0.05 | 1.05 ± 0.08 |   | 0.94 ± 0.04 | 0.94 ± 0.04  | 1.17 ± 0.09 | 1.02 ± 0.04 | †  | 0.95 ± 0.04  | 1.18 ± 0.09  |
| <i>thpo</i>   | 0.89 ± 0.09 | 0.95 ± 0.09 |   | 1.06 ± 0.11 | 1.03 ± 0.03  | 0.88 ± 0.08 | 1.01 ± 0.07 |    | 1.05 ± 0.07  | 0.99 ± 0.04  |
| <i>thra</i>   | 1.10 ± 0.02 | 1.19 ± 0.03 |   | 1.08 ± 0.05 | 1.08 ± 0.05  | 0.90 ± 0.04 | 0.89 ± 0.04 |    | 0.84 ± 0.03  | 0.85 ± 0.01  |
| <i>tp53</i>   | 1.38 ± 0.16 | 1.41 ± 0.19 | * | 1.04 ± 0.06 | 1.10 ± 0.08  | 0.95 ± 0.10 | 0.90 ± 0.11 |    | 0.93 ± 0.03  | 0.69 ± 0.04  |
| <i>trp63</i>  | 1.07 ± 0.17 | 1.11 ± 0.20 |   | 0.88 ± 0.14 | 0.92 ± 0.13  | 1.12 ± 0.18 | 0.96 ± 0.05 |    | 1.00 ± 0.05  | 0.90 ± 0.12  |
| <i>tsc1</i>   | 0.90 ± 0.03 | 1.13 ± 0.04 |   | 0.89 ± 0.05 | 1.00 ± 0.10  | 1.07 ± 0.12 | 1.05 ± 0.11 |    | 1.07 ± 0.08  | 1.06 ± 0.05  |
| <i>tsc2</i>   | 1.00 ± 0.03 | 1.06 ± 0.04 |   | 0.97 ± 0.02 | 1.10 ± 0.03  | 0.99 ± 0.02 | 0.98 ± 0.03 | *† | 1.11 ± 0.02† | 0.98 ± 0.02  |
| <i>ube1c</i>  | 0.99 ± 0.04 | 0.94 ± 0.02 |   | 1.00 ± 0.02 | 0.99 ± 0.03  | 1.09 ± 0.04 | 1.02 ± 0.03 |    | 1.09 ± 0.04  | 0.97 ± 0.03  |
| <i>uchl1</i>  | 0.95 ± 0.03 | 0.93 ± 0.02 |   | 0.91 ± 0.03 | 0.97 ± 0.02  | 1.01 ± 0.04 | 1.21 ± 0.05 |    | 1.09 ± 0.03  | 1.24 ± 0.05  |
| <i>uchl3</i>  | 0.96 ± 0.01 | 0.94 ± 0.01 |   | 0.98 ± 0.01 | 0.95 ± 0.02  | 1.04 ± 0.02 | 1.07 ± 0.03 |    | 1.05 ± 0.03  | 1.09 ± 0.02  |
| <i>vav1</i>   | 1.02 ± 0.19 | 1.27 ± 0.15 |   | 0.97 ± 0.08 | 1.19 ± 0.16  | 0.70 ± 0.12 | 1.03 ± 0.20 |    | 0.87 ± 0.06  | 1.12 ± 0.11  |
| <i>vegf</i>   | 1.34 ± 0.13 | 1.38 ± 0.08 |   | 1.25 ± 0.15 | 1.20 ± 0.04  | 0.57 ± 0.02 | 0.71 ± 0.06 |    | 0.57 ± 0.04  | 0.71 ± 0.09  |
| <i>vegfb</i>  | 0.89 ± 0.05 | 0.93 ± 0.05 | * | 1.05 ± 0.06 | 1.00 ± 0.03  | 0.90 ± 0.04 | 1.07 ± 0.04 | *  | 0.96 ± 0.05  | 1.26 ± 0.09  |
| <i>vegfc</i>  | 0.90 ± 0.05 | 0.79 ± 0.09 |   | 0.99 ± 0.06 | 0.88 ± 0.04  | 1.10 ± 0.05 | 1.09 ± 0.05 | *  | 1.36 ± 0.07  | 1.25 ± 0.10  |
| <i>vhl</i>    | 1.00 ± 0.02 | 1.06 ± 0.02 |   | 0.99 ± 0.02 | 1.07 ± 0.03  | 1.01 ± 0.02 | 1.01 ± 0.01 | *  | 0.95 ± 0.01  | 0.95 ± 0.02  |
| <i>wtl</i>    | 1.40 ± 0.52 | 1.89 ± 0.47 | † | 1.34 ± 0.35 | 0.56 ± 0.16† | 0.98 ± 0.29 | 1.33 ± 0.30 |    | 1.62 ± 0.42  | 1.30 ± 0.22  |

Normalized expression ratios are given as mean ± SE obtained from five independent cultures in each group, with the sample from each culture run on a separate array. Several of the values reported in this table have appeared in previous studies of other gene groupings [1,3-7,9,10].

\*Significant main treatment effect in two-factor ANOVA (treatment, time).

†Interaction of treatment × time; then, † denotes significant treatment effect for a given time point.

Global statistical analysis of Table 3: ANOVA factors of treatment, differentiation state, gene, time<sup>§</sup>

Treatment × gene,  $p < 0.0001$ ; treatment × state,  $p < 0.03$ ; treatment × gene × time,  $p < 0.0003$ ; treatment × gene × state,  $p < 0.0001$ ; treatment × gene × state × time,  $p < 0.0001$

Undifferentiated: treatment main effect (Control > CPF),  $p < 0.005$ ; treatment × gene,  $p < 0.0001$ ; treatment × gene × time,  $p < 0.005$

Differentiating: treatment × gene,  $p < 0.0001$ ; treatment × gene × time,  $p < 0.0001$

<sup>§</sup>results shown include only treatment effects and interactions of treatment with other variables

Supplemental Table 4. Apoptosis Genes In Vitro

| Gene           | Undifferentiated |             |              |              | Differentiating |             |              |    |              |              |
|----------------|------------------|-------------|--------------|--------------|-----------------|-------------|--------------|----|--------------|--------------|
|                | Control          |             | Chlorpyrifos |              | Control         |             | Chlorpyrifos |    |              |              |
|                | 24h              | 72h         |              | 24h          | 72h             | 24h         | 72h          |    | 24h          | 72h          |
| <i>aatf</i>    | 1.14 ± 0.05      | 1.14 ± 0.07 |              | 1.17 ± 0.04  | 1.10 ± 0.05     | 0.85 ± 0.04 | 0.86 ± 0.05  |    | 0.85 ± 0.05  | 0.88 ± 0.05  |
| <i>aatk</i>    | 0.82 ± 0.05      | 0.91 ± 0.11 | *            | 1.11 ± 0.12  | 1.24 ± 0.26     | 1.03 ± 0.18 | 1.07 ± 0.15  |    | 1.05 ± 0.07  | 1.07 ± 0.07  |
| <i>accn1</i>   | 1.10 ± 0.15      | 1.03 ± 0.13 |              | 0.93 ± 0.09  | 0.92 ± 0.06     | 1.34 ± 0.21 | 1.02 ± 0.05  |    | 0.94 ± 0.08  | 1.02 ± 0.07  |
| <i>adam17</i>  | 0.92 ± 0.04      | 0.89 ± 0.06 |              | 0.96 ± 0.05  | 0.93 ± 0.04     | 0.97 ± 0.05 | 1.14 ± 0.03  |    | 1.07 ± 0.05  | 1.14 ± 0.04  |
| <i>ahr</i>     | 0.97 ± 0.08      | 1.05 ± 0.07 |              | 1.05 ± 0.05  | 1.14 ± 0.05     | 0.82 ± 0.07 | 0.94 ± 0.06  |    | 0.98 ± 0.05  | 1.05 ± 0.11  |
| <i>aip1</i>    | 0.93 ± 0.06      | 1.12 ± 0.09 |              | 0.92 ± 0.06  | 1.03 ± 0.04     | 1.07 ± 0.09 | 1.00 ± 0.04  |    | 1.06 ± 0.05  | 0.98 ± 0.05  |
| <i>akt1</i>    | 0.94 ± 0.04      | 0.88 ± 0.02 |              | 0.91 ± 0.02  | 0.91 ± 0.02     | 1.03 ± 0.03 | 1.09 ± 0.01  | †  | 1.13 ± 0.04  | 1.08 ± 0.03  |
| <i>alox15</i>  | 1.02 ± 0.03      | 1.04 ± 0.03 |              | 1.01 ± 0.03  | 1.05 ± 0.04     | 0.98 ± 0.03 | 0.98 ± 0.04  |    | 0.96 ± 0.06  | 0.95 ± 0.02  |
| <i>amid</i>    | 1.10 ± 0.08      | 1.00 ± 0.05 |              | 0.98 ± 0.07  | 1.12 ± 0.10     | 1.04 ± 0.05 | 0.94 ± 0.06  |    | 1.02 ± 0.04  | 1.00 ± 0.12  |
| <i>amigo2</i>  | 1.14 ± 0.06      | 0.87 ± 0.06 |              | 1.14 ± 0.06  | 0.98 ± 0.16     | 0.85 ± 0.10 | 1.01 ± 0.13  |    | 0.61 ± 0.06  | 0.91 ± 0.11  |
| <i>apaf1</i>   | 0.99 ± 0.03      | 1.11 ± 0.03 |              | 0.99 ± 0.08  | 1.14 ± 0.03     | 0.98 ± 0.02 | 0.97 ± 0.02  |    | 1.01 ± 0.04  | 0.96 ± 0.02  |
| <i>apbb2</i>   | 0.66 ± 0.02      | 0.64 ± 0.02 |              | 0.68 ± 0.02  | 0.64 ± 0.03     | 1.34 ± 0.03 | 1.28 ± 0.02  | *  | 1.46 ± 0.04  | 1.35 ± 0.06  |
| <i>apbb3</i>   | 0.94 ± 0.07      | 0.95 ± 0.05 |              | 0.86 ± 0.04  | 0.99 ± 0.08     | 1.16 ± 0.05 | 1.09 ± 0.03  | †  | 1.01 ± 0.04† | 1.28 ± 0.04† |
| <i>api2</i>    | 0.99 ± 0.02      | 1.01 ± 0.04 |              | 1.03 ± 0.03  | 1.02 ± 0.04     | 1.07 ± 0.05 | 0.99 ± 0.06  | *  | 0.95 ± 0.04  | 0.87 ± 0.02  |
| <i>api5</i>    | 1.10 ± 0.03      | 0.99 ± 0.04 |              | 1.01 ± 0.03  | 0.96 ± 0.05     | 1.03 ± 0.03 | 0.83 ± 0.04  |    | 1.06 ± 0.01  | 0.84 ± 0.02  |
| <i>aplp1</i>   | 0.91 ± 0.02      | 0.95 ± 0.01 |              | 0.90 ± 0.02  | 1.01 ± 0.04     | 1.01 ± 0.02 | 1.26 ± 0.04  | *  | 1.07 ± 0.02  | 1.29 ± 0.03  |
| <i>apoe</i>    | 1.28 ± 0.10      | 1.47 ± 0.13 | *            | 1.05 ± 0.05  | 1.14 ± 0.11     | 0.87 ± 0.03 | 1.04 ± 0.03  | *  | 0.82 ± 0.02  | 0.87 ± 0.04  |
| <i>app</i>     | 0.96 ± 0.02      | 0.81 ± 0.01 |              | 0.97 ± 0.04  | 0.86 ± 0.02     | 1.04 ± 0.02 | 1.04 ± 0.02  | *† | 1.08 ± 0.01  | 1.16 ± 0.02† |
| <i>apbbp1</i>  | 1.06 ± 0.03      | 1.05 ± 0.01 |              | 1.06 ± 0.02  | 1.06 ± 0.03     | 1.00 ± 0.02 | 0.83 ± 0.01  | *  | 0.94 ± 0.02  | 0.82 ± 0.02  |
| <i>atm</i>     | 1.43 ± 0.07      | 1.29 ± 0.06 | *            | 1.28 ± 0.09  | 1.15 ± 0.05     | 0.86 ± 0.05 | 0.72 ± 0.02  | *  | 0.80 ± 0.04  | 0.64 ± 0.03  |
| <i>aven</i>    | 0.91 ± 0.01      | 0.90 ± 0.03 |              | 0.88 ± 0.02  | 0.94 ± 0.03     | 1.09 ± 0.03 | 1.19 ± 0.03  | †  | 1.22 ± 0.04† | 1.06 ± 0.01† |
| <i>axud1</i>   | 0.94 ± 0.06      | 1.01 ± 0.03 |              | 0.96 ± 0.02  | 1.03 ± 0.03     | 0.99 ± 0.05 | 1.02 ± 0.04  |    | 0.98 ± 0.03  | 1.09 ± 0.06  |
| <i>bad</i>     | 0.92 ± 0.01      | 1.01 ± 0.01 | *            | 1.01 ± 0.01  | 1.05 ± 0.02     | 1.00 ± 0.04 | 0.99 ± 0.03  |    | 1.01 ± 0.03  | 0.99 ± 0.03  |
| <i>bat3</i>    | 1.01 ± 0.05      | 1.07 ± 0.04 |              | 0.95 ± 0.03  | 1.03 ± 0.04     | 0.99 ± 0.04 | 1.05 ± 0.04  |    | 0.98 ± 0.04  | 1.06 ± 0.04  |
| <i>bax</i>     | 1.05 ± 0.02      | 1.03 ± 0.01 | *            | 1.08 ± 0.02  | 1.09 ± 0.02     | 0.96 ± 0.01 | 0.94 ± 0.02  |    | 0.94 ± 0.01  | 0.94 ± 0.01  |
| <i>bbc3</i>    | 0.89 ± 0.02      | 0.85 ± 0.02 | *            | 0.93 ± 0.02  | 0.92 ± 0.02     | 1.09 ± 0.02 | 1.73 ± 0.04  | *  | 1.12 ± 0.03  | 1.86 ± 0.05  |
| <i>bcl10</i>   | 0.78 ± 0.02      | 0.77 ± 0.01 |              | 0.81 ± 0.01  | 0.78 ± 0.01     | 1.44 ± 0.03 | 1.22 ± 0.03  |    | 1.47 ± 0.04  | 1.26 ± 0.02  |
| <i>bcl2</i>    | 1.09 ± 0.05      | 0.92 ± 0.07 |              | 1.07 ± 0.08  | 1.16 ± 0.10     | 1.18 ± 0.14 | 0.96 ± 0.03  | †  | 0.94 ± 0.06  | 1.04 ± 0.03  |
| <i>bcl2a1</i>  | 0.69 ± 0.14      | 1.10 ± 0.17 |              | 1.23 ± 0.22  | 1.27 ± 0.39     | 0.93 ± 0.16 | 1.53 ± 0.22  |    | 0.86 ± 0.11  | 0.98 ± 0.15  |
| <i>bcl2l1</i>  | 0.79 ± 0.05      | 1.02 ± 0.08 |              | 0.87 ± 0.08  | 0.95 ± 0.04     | 0.90 ± 0.06 | 1.19 ± 0.09  |    | 1.09 ± 0.10  | 1.17 ± 0.08  |
| <i>bcl2l10</i> | 1.01 ± 0.02      | 1.06 ± 0.03 |              | 1.04 ± 0.02  | 1.03 ± 0.03     | 0.97 ± 0.02 | 0.93 ± 0.02  |    | 0.97 ± 0.03  | 0.99 ± 0.03  |
| <i>bcl2l11</i> | 1.90 ± 1.08      | 0.96 ± 0.19 |              | 1.17 ± 0.21  | 1.21 ± 0.42     | 0.93 ± 0.13 | 1.16 ± 0.09  |    | 1.06 ± 0.23  | 0.81 ± 0.19  |
| <i>bcl2l13</i> | 0.97 ± 0.09      | 0.93 ± 0.06 |              | 0.99 ± 0.09  | 1.05 ± 0.09     | 0.84 ± 0.04 | 1.03 ± 0.05  | *  | 1.19 ± 0.10  | 1.32 ± 0.10  |
| <i>bdnf</i>    | 0.82 ± 0.23      | 0.92 ± 0.12 | *            | 1.78 ± 0.36  | 2.05 ± 0.80     | 1.36 ± 0.30 | 1.27 ± 0.41  |    | 0.93 ± 0.42  | 0.92 ± 0.21  |
| <i>bfar</i>    | 1.06 ± 0.02      | 1.05 ± 0.04 |              | 1.13 ± 0.06  | 1.02 ± 0.05     | 0.98 ± 0.04 | 0.95 ± 0.03  |    | 0.94 ± 0.03  | 0.96 ± 0.02  |
| <i>bid</i>     | 0.79 ± 0.09      | 0.79 ± 0.09 |              | 0.88 ± 0.09  | 0.86 ± 0.08     | 1.15 ± 0.12 | 0.91 ± 0.05  |    | 1.11 ± 0.12  | 1.23 ± 0.12  |
| <i>bid3</i>    | 1.60 ± 0.04      | 1.63 ± 0.06 | *            | 1.69 ± 0.04  | 1.71 ± 0.04     | 0.48 ± 0.01 | 0.45 ± 0.01  | *  | 0.44 ± 0.01  | 0.43 ± 0.02  |
| <i>biklk</i>   | 1.25 ± 0.04      | 1.14 ± 0.03 |              | 1.24 ± 0.03  | 1.15 ± 0.04     | 0.89 ± 0.02 | 0.79 ± 0.02  | *  | 0.80 ± 0.02  | 0.70 ± 0.02  |
| <i>birc1b</i>  | 0.96 ± 0.03      | 0.98 ± 0.09 |              | 1.13 ± 0.18  | 1.25 ± 0.15     | 1.11 ± 0.05 | 1.05 ± 0.10  | *  | 0.93 ± 0.03  | 0.80 ± 0.08  |
| <i>birc3</i>   | 0.84 ± 0.11      | 1.16 ± 0.18 | †            | 0.94 ± 0.09  | 0.75 ± 0.16     | 1.20 ± 0.10 | 0.93 ± 0.05  | †  | 0.87 ± 0.09† | 1.15 ± 0.06† |
| <i>birc4</i>   | 1.16 ± 0.05      | 1.00 ± 0.04 | *            | 1.01 ± 0.09  | 0.97 ± 0.02     | 1.07 ± 0.07 | 0.94 ± 0.03  | †  | 0.89 ± 0.06† | 1.02 ± 0.02  |
| <i>birc5</i>   | 0.97 ± 0.05      | 1.05 ± 0.05 |              | 0.99 ± 0.07  | 1.11 ± 0.07     | 0.88 ± 0.06 | 1.00 ± 0.10  |    | 0.83 ± 0.07  | 0.94 ± 0.06  |
| <i>bmf</i>     | 1.11 ± 0.09      | 1.04 ± 0.36 |              | 0.85 ± 0.17  | 0.78 ± 0.11     | 0.97 ± 0.46 | 1.18 ± 0.18  |    | 1.28 ± 0.29  | 0.93 ± 0.21  |
| <i>bnip1</i>   | 1.00 ± 0.03      | 1.03 ± 0.03 | *            | 0.92 ± 0.02  | 0.98 ± 0.04     | 0.99 ± 0.01 | 1.04 ± 0.02  | †  | 1.03 ± 0.01  | 0.95 ± 0.04  |
| <i>bnip3</i>   | 1.27 ± 0.03      | 1.29 ± 0.02 | *            | 1.15 ± 0.02  | 1.24 ± 0.01     | 0.58 ± 0.02 | 0.77 ± 0.03  |    | 0.59 ± 0.03  | 0.80 ± 0.04  |
| <i>bok</i>     | 0.95 ± 0.03      | 0.99 ± 0.03 | *            | 0.99 ± 0.03  | 1.07 ± 0.04     | 0.94 ± 0.02 | 1.04 ± 0.04  | †  | 1.06 ± 0.03† | 1.01 ± 0.03  |
| <i>brca1</i>   | 1.00 ± 0.05      | 1.35 ± 0.02 | †            | 1.40 ± 0.11† | 1.24 ± 0.15     | 1.03 ± 0.10 | 0.80 ± 0.07  |    | 0.92 ± 0.06  | 0.90 ± 0.07  |
| <i>btbd14b</i> | 1.02 ± 0.03      | 0.94 ± 0.02 |              | 0.98 ± 0.05  | 1.04 ± 0.10     | 1.08 ± 0.10 | 1.12 ± 0.09  | *  | 1.00 ± 0.08  | 0.82 ± 0.10  |
| <i>btg1</i>    | 1.16 ± 0.02      | 1.10 ± 0.02 |              | 1.19 ± 0.04  | 1.08 ± 0.02     | 0.68 ± 0.02 | 0.78 ± 0.02  |    | 0.67 ± 0.03  | 0.86 ± 0.03  |
| <i>c9</i>      | 1.22 ± 0.15      | 0.99 ± 0.09 |              | 0.94 ± 0.06  | 0.91 ± 0.06     | 1.11 ± 0.08 | 1.00 ± 0.07  |    | 0.91 ± 0.10  | 0.94 ± 0.05  |
| <i>casp1</i>   | 0.64 ± 0.14      | 1.17 ± 0.36 |              | 0.83 ± 0.25  | 1.05 ± 0.10     | 0.89 ± 0.20 | 0.94 ± 0.24  |    | 0.87 ± 0.18  | 0.78 ± 0.24  |
| <i>casp12</i>  | 1.35 ± 0.39      | 1.26 ± 0.05 |              | 1.00 ± 0.14  | 0.93 ± 0.08     | 0.98 ± 0.14 | 1.15 ± 0.16  |    | 0.92 ± 0.07  | 1.02 ± 0.03  |
| <i>casp2</i>   | 1.12 ± 0.01      | 1.12 ± 0.01 |              | 1.12 ± 0.02  | 1.11 ± 0.02     | 0.93 ± 0.01 | 0.88 ± 0.01  | *  | 0.87 ± 0.01  | 0.80 ± 0.01  |
| <i>casp3</i>   | 0.89 ± 0.06      | 0.98 ± 0.02 |              | 0.94 ± 0.05  | 0.98 ± 0.07     | 1.19 ± 0.04 | 0.90 ± 0.06  | †  | 0.94 ± 0.02† | 1.14 ± 0.06† |

| Supplemental Table 4 (continued) |             |             |    |              |              |             |             |    |              |              |
|----------------------------------|-------------|-------------|----|--------------|--------------|-------------|-------------|----|--------------|--------------|
| <i>casp4</i>                     | 0.88 ± 0.04 | 1.01 ± 0.02 | *  | 0.81 ± 0.05  | 0.78 ± 0.04  | 1.01 ± 0.02 | 1.12 ± 0.02 | *  | 1.08 ± 0.06  | 1.23 ± 0.02  |
| <i>casp6</i>                     | 0.99 ± 0.08 | 0.81 ± 0.10 |    | 0.84 ± 0.13  | 0.94 ± 0.05  | 1.03 ± 0.07 | 1.15 ± 0.04 |    | 0.98 ± 0.11  | 1.14 ± 0.09  |
| <i>casp7</i>                     | 1.12 ± 0.02 | 1.09 ± 0.02 |    | 1.08 ± 0.02  | 1.09 ± 0.02  | 0.94 ± 0.01 | 0.80 ± 0.02 | *  | 0.86 ± 0.01  | 0.71 ± 0.02  |
| <i>casp8</i>                     | 0.83 ± 0.09 | 0.95 ± 0.13 |    | 1.06 ± 0.08  | 0.88 ± 0.14  | 1.24 ± 0.17 | 0.96 ± 0.05 |    | 1.06 ± 0.14  | 1.00 ± 0.04  |
| <i>casp9</i>                     | 0.91 ± 0.06 | 0.94 ± 0.12 |    | 0.98 ± 0.09  | 0.99 ± 0.07  | 0.99 ± 0.11 | 1.09 ± 0.16 |    | 1.12 ± 0.10  | 0.99 ± 0.03  |
| <i>cb127</i>                     | 1.09 ± 0.01 | 1.06 ± 0.02 | *  | 1.00 ± 0.04  | 1.02 ± 0.03  | 1.03 ± 0.04 | 0.97 ± 0.02 | *† | 0.92 ± 0.02† | 0.96 ± 0.01  |
| <i>cd2</i>                       | 1.33 ± 0.27 | 1.03 ± 0.14 |    | 1.06 ± 0.24  | 1.02 ± 0.30  | 1.19 ± 0.21 | 1.09 ± 0.34 |    | 0.84 ± 0.28  | 0.73 ± 0.17  |
| <i>cd28</i>                      | 1.30 ± 0.40 | 1.10 ± 0.38 |    | 1.21 ± 0.27  | 0.79 ± 0.18  | 1.28 ± 0.25 | 0.96 ± 0.20 |    | 0.96 ± 0.23  | 0.99 ± 0.12  |
| <i>cd51</i>                      | 1.05 ± 0.19 | 1.11 ± 0.10 |    | 0.83 ± 0.06  | 1.01 ± 0.09  | 1.55 ± 0.26 | 0.87 ± 0.15 |    | 1.11 ± 0.20  | 1.10 ± 0.31  |
| <i>cdkn1a</i>                    | 0.80 ± 0.03 | 0.98 ± 0.07 | †  | 0.95 ± 0.04† | 0.90 ± 0.05  | 1.15 ± 0.05 | 1.19 ± 0.02 | *  | 0.95 ± 0.03  | 1.12 ± 0.04  |
| <i>cebpb</i>                     | 0.82 ± 0.07 | 0.92 ± 0.04 | *  | 0.97 ± 0.06  | 1.07 ± 0.05  | 0.80 ± 0.01 | 1.08 ± 0.03 | *† | 1.13 ± 0.06† | 1.22 ± 0.08  |
| <i>cflar</i>                     | 0.89 ± 0.03 | 0.83 ± 0.01 | *  | 0.90 ± 0.06  | 0.96 ± 0.04  | 1.13 ± 0.05 | 1.08 ± 0.06 | †  | 1.00 ± 0.04  | 1.16 ± 0.04  |
| <i>cipar1</i>                    | 1.11 ± 0.02 | 1.16 ± 0.01 | *  | 1.10 ± 0.02  | 1.09 ± 0.01  | 0.90 ± 0.02 | 0.67 ± 0.01 | *  | 0.82 ± 0.01  | 0.61 ± 0.01  |
| <i>col18al</i>                   | 1.04 ± 0.07 | 1.22 ± 0.08 | *  | 0.88 ± 0.03  | 1.05 ± 0.06  | 0.98 ± 0.05 | 0.85 ± 0.05 | *  | 1.07 ± 0.03  | 0.97 ± 0.03  |
| <i>creb1</i>                     | 0.87 ± 0.03 | 0.88 ± 0.04 | *  | 1.03 ± 0.04  | 0.99 ± 0.05  | 1.19 ± 0.10 | 1.03 ± 0.02 | *  | 1.37 ± 0.07  | 1.13 ± 0.09  |
| <i>csell</i>                     | 1.07 ± 0.04 | 1.09 ± 0.02 |    | 1.08 ± 0.03  | 1.05 ± 0.03  | 0.97 ± 0.03 | 0.79 ± 0.02 | *  | 0.90 ± 0.01  | 0.75 ± 0.01  |
| <i>cs1b</i>                      | 0.91 ± 0.01 | 0.83 ± 0.01 | *  | 1.00 ± 0.01  | 0.94 ± 0.02  | 0.99 ± 0.01 | 1.15 ± 0.02 | *  | 1.12 ± 0.01  | 1.38 ± 0.02  |
| <i>cugbp2</i>                    | 0.93 ± 0.07 | 1.21 ± 0.06 |    | 0.92 ± 0.11  | 1.19 ± 0.30  | 1.25 ± 0.18 | 0.78 ± 0.09 | †  | 0.92 ± 0.13  | 1.07 ± 0.13  |
| <i>dad1</i>                      | 1.05 ± 0.01 | 1.07 ± 0.01 |    | 1.04 ± 0.02  | 1.07 ± 0.03  | 0.92 ± 0.01 | 0.92 ± 0.02 |    | 0.92 ± 0.01  | 0.92 ± 0.01  |
| <i>dap</i>                       | 0.73 ± 0.03 | 0.75 ± 0.04 | *  | 0.80 ± 0.01  | 0.84 ± 0.03  | 1.19 ± 0.05 | 1.30 ± 0.04 | *  | 1.39 ± 0.04  | 1.50 ± 0.06  |
| <i>dapkl</i>                     | 0.95 ± 0.05 | 0.96 ± 0.01 | †  | 0.89 ± 0.03  | 1.04 ± 0.02  | 0.99 ± 0.03 | 1.11 ± 0.05 |    | 0.99 ± 0.05  | 1.14 ± 0.05  |
| <i>daxx</i>                      | 1.07 ± 0.02 | 1.10 ± 0.01 | *  | 1.04 ± 0.01  | 1.02 ± 0.02  | 1.01 ± 0.03 | 0.86 ± 0.01 | *  | 0.97 ± 0.02  | 0.81 ± 0.01  |
| <i>dcc</i>                       | 0.77 ± 0.16 | 1.04 ± 0.18 |    | 0.96 ± 0.10  | 0.92 ± 0.13  | 0.96 ± 0.29 | 1.25 ± 0.22 |    | 1.13 ± 0.18  | 0.92 ± 0.05  |
| <i>ddit3</i>                     | 0.84 ± 0.03 | 0.89 ± 0.02 |    | 0.84 ± 0.01  | 0.88 ± 0.01  | 1.22 ± 0.03 | 1.13 ± 0.02 | *  | 1.38 ± 0.03  | 1.26 ± 0.03  |
| <i>dedd</i>                      | 0.90 ± 0.03 | 0.93 ± 0.05 |    | 0.90 ± 0.01  | 0.96 ± 0.03  | 1.01 ± 0.05 | 1.08 ± 0.04 |    | 1.13 ± 0.03  | 1.06 ± 0.02  |
| <i>dffa</i>                      | 1.11 ± 0.05 | 1.07 ± 0.04 | *  | 1.02 ± 0.03  | 1.02 ± 0.03  | 1.04 ± 0.03 | 0.93 ± 0.02 |    | 1.02 ± 0.02  | 0.94 ± 0.02  |
| <i>dffb</i>                      | 0.87 ± 0.12 | 1.20 ± 0.11 |    | 0.97 ± 0.08  | 1.26 ± 0.18  | 0.80 ± 0.09 | 0.88 ± 0.04 | *  | 1.21 ± 0.07  | 1.28 ± 0.10  |
| <i>dnajb9</i>                    | 0.87 ± 0.02 | 0.88 ± 0.01 | *  | 0.93 ± 0.01  | 0.97 ± 0.01  | 1.01 ± 0.01 | 1.09 ± 0.01 | *† | 1.03 ± 0.01  | 1.19 ± 0.01† |
| <i>dnase1</i>                    | 1.06 ± 0.04 | 1.12 ± 0.07 |    | 1.26 ± 0.13  | 1.14 ± 0.04  | 0.92 ± 0.06 | 0.83 ± 0.06 |    | 0.99 ± 0.08  | 0.83 ± 0.07  |
| <i>dnase113</i>                  | 0.94 ± 0.09 | 1.06 ± 0.04 |    | 0.90 ± 0.07  | 0.95 ± 0.07  | 0.91 ± 0.07 | 1.01 ± 0.08 |    | 1.05 ± 0.05  | 0.94 ± 0.07  |
| <i>dnase2</i>                    | 1.04 ± 0.01 | 1.03 ± 0.03 |    | 1.05 ± 0.03  | 1.03 ± 0.03  | 0.98 ± 0.01 | 0.94 ± 0.04 |    | 0.99 ± 0.03  | 0.96 ± 0.02  |
| <i>dnm2</i>                      | 0.97 ± 0.04 | 0.94 ± 0.05 |    | 0.92 ± 0.05  | 0.97 ± 0.02  | 1.05 ± 0.03 | 1.04 ± 0.04 | †  | 1.10 ± 0.01  | 0.98 ± 0.01  |
| <i>dpf2</i>                      | 1.01 ± 0.02 | 1.00 ± 0.02 |    | 1.02 ± 0.03  | 1.01 ± 0.02  | 1.01 ± 0.02 | 1.01 ± 0.02 |    | 0.99 ± 0.02  | 1.03 ± 0.02  |
| <i>dustypk</i>                   | 0.99 ± 0.08 | 0.98 ± 0.05 |    | 0.90 ± 0.10  | 1.01 ± 0.07  | 0.99 ± 0.08 | 1.02 ± 0.07 |    | 0.95 ± 0.08  | 0.99 ± 0.06  |
| <i>eaf2</i>                      | 2.35 ± 0.60 | 0.69 ± 0.13 | †  | 0.75 ± 0.13† | 0.90 ± 0.16  | 1.15 ± 0.22 | 1.02 ± 0.16 |    | 1.23 ± 0.05  | 0.88 ± 0.11  |
| <i>egln3</i>                     | 1.21 ± 0.03 | 1.41 ± 0.03 | *  | 1.13 ± 0.03  | 1.32 ± 0.03  | 0.66 ± 0.02 | 0.77 ± 0.03 |    | 0.68 ± 0.02  | 0.80 ± 0.05  |
| <i>ets1</i>                      | 0.93 ± 0.04 | 1.05 ± 0.04 |    | 0.96 ± 0.02  | 0.99 ± 0.04  | 0.99 ± 0.03 | 0.93 ± 0.03 | *  | 1.05 ± 0.03  | 1.17 ± 0.13  |
| <i>fadd</i>                      | 0.97 ± 0.07 | 1.12 ± 0.06 |    | 0.99 ± 0.02  | 1.00 ± 0.04  | 1.30 ± 0.05 | 0.97 ± 0.08 |    | 1.23 ± 0.05  | 0.88 ± 0.04  |
| <i>faf1</i>                      | 0.91 ± 0.03 | 0.84 ± 0.04 | *  | 0.94 ± 0.03  | 0.92 ± 0.02  | 1.14 ± 0.03 | 1.09 ± 0.03 | †  | 1.21 ± 0.02  | 1.03 ± 0.04  |
| <i>faim</i>                      | 0.93 ± 0.03 | 0.92 ± 0.05 |    | 0.93 ± 0.02  | 0.96 ± 0.03  | 1.01 ± 0.03 | 1.14 ± 0.04 |    | 1.06 ± 0.05  | 1.14 ± 0.01  |
| <i>faim2</i>                     | 0.90 ± 0.07 | 1.06 ± 0.06 |    | 0.97 ± 0.05  | 0.99 ± 0.04  | 1.01 ± 0.09 | 0.95 ± 0.07 |    | 1.01 ± 0.08  | 1.08 ± 0.06  |
| <i>g6pdx</i>                     | 1.02 ± 0.06 | 0.73 ± 0.03 |    | 1.00 ± 0.04  | 0.74 ± 0.02  | 1.21 ± 0.03 | 1.00 ± 0.03 | †  | 1.14 ± 0.05  | 1.11 ± 0.03  |
| <i>gapd</i>                      | 0.92 ± 0.01 | 0.92 ± 0.01 | *† | 0.92 ± 0.01  | 0.96 ± 0.01† | 1.11 ± 0.01 | 1.23 ± 0.03 |    | 1.16 ± 0.02  | 1.24 ± 0.01  |
| <i>gch</i>                       | 0.74 ± 0.01 | 0.75 ± 0.01 | *  | 0.81 ± 0.01  | 0.84 ± 0.02  | 1.36 ± 0.04 | 1.16 ± 0.03 | *  | 1.58 ± 0.02  | 1.27 ± 0.03  |
| <i>gjb6</i>                      | 1.30 ± 0.28 | 0.97 ± 0.13 | †  | 0.77 ± 0.11  | 1.25 ± 0.18  | 0.92 ± 0.15 | 1.05 ± 0.11 |    | 0.85 ± 0.13  | 0.76 ± 0.08  |
| <i>gnaq</i>                      | 0.86 ± 0.06 | 0.99 ± 0.06 | †  | 1.05 ± 0.10  | 0.85 ± 0.07  | 1.00 ± 0.07 | 1.10 ± 0.05 |    | 1.02 ± 0.06  | 1.13 ± 0.09  |
| <i>gnrh1</i>                     | 0.93 ± 0.02 | 0.96 ± 0.03 |    | 1.00 ± 0.04  | 0.97 ± 0.01  | 0.93 ± 0.04 | 1.09 ± 0.05 |    | 1.02 ± 0.01  | 1.10 ± 0.03  |
| <i>gpx1</i>                      | 0.97 ± 0.01 | 1.01 ± 0.01 |    | 1.00 ± 0.01  | 0.97 ± 0.03  | 0.93 ± 0.01 | 1.08 ± 0.02 |    | 0.93 ± 0.03  | 1.06 ± 0.03  |
| <i>gsk3b</i>                     | 0.98 ± 0.05 | 0.93 ± 0.03 |    | 0.90 ± 0.05  | 0.91 ± 0.02  | 1.06 ± 0.02 | 1.06 ± 0.03 |    | 1.06 ± 0.03  | 1.12 ± 0.03  |
| <i>gspt1</i>                     | 0.97 ± 0.02 | 0.93 ± 0.02 |    | 0.97 ± 0.02  | 0.96 ± 0.02  | 1.06 ± 0.02 | 1.07 ± 0.03 | †  | 1.09 ± 0.02  | 1.01 ± 0.02  |
| <i>gzma</i>                      | 1.03 ± 0.06 | 0.98 ± 0.05 | †  | 1.20 ± 0.04† | 0.86 ± 0.06  | 1.29 ± 0.08 | 0.90 ± 0.05 | †  | 1.02 ± 0.08† | 1.05 ± 0.09  |
| <i>gzmb</i>                      | 0.91 ± 0.10 | 1.13 ± 0.09 |    | 0.85 ± 0.10  | 0.97 ± 0.07  | 0.86 ± 0.04 | 1.16 ± 0.14 | *  | 1.13 ± 0.08  | 1.20 ± 0.06  |
| <i>hdh</i>                       | 0.93 ± 0.02 | 0.96 ± 0.03 | *† | 0.91 ± 0.07  | 1.35 ± 0.09† | 0.96 ± 0.03 | 1.24 ± 0.08 | †  | 1.14 ± 0.08  | 0.99 ± 0.07† |
| <i>hip1</i>                      | 0.92 ± 0.03 | 1.01 ± 0.03 |    | 0.89 ± 0.02  | 1.04 ± 0.07  | 1.01 ± 0.02 | 1.04 ± 0.04 |    | 1.00 ± 0.08  | 1.04 ± 0.02  |
| <i>hmax1</i>                     | 1.41 ± 0.03 | 1.41 ± 0.03 | *  | 1.34 ± 0.02  | 1.30 ± 0.03  | 0.74 ± 0.02 | 0.62 ± 0.02 |    | 0.77 ± 0.01  | 0.64 ± 0.02  |
| <i>hrpap20</i>                   | 0.95 ± 0.02 | 1.07 ± 0.04 | *  | 0.89 ± 0.01  | 1.02 ± 0.03  | 1.05 ± 0.04 | 1.02 ± 0.05 |    | 1.04 ± 0.04  | 0.98 ± 0.03  |
| <i>hspa1a</i>                    | 0.81 ± 0.02 | 0.82 ± 0.01 |    | 0.83 ± 0.02  | 0.86 ± 0.02  | 1.28 ± 0.04 | 1.26 ± 0.04 | *  | 1.19 ± 0.02  | 1.17 ± 0.03  |
| <i>igfl</i>                      | 0.86 ± 0.03 | 0.99 ± 0.01 | *† | 1.13 ± 0.07† | 1.08 ± 0.07  | 0.98 ± 0.02 | 0.96 ± 0.03 |    | 0.98 ± 0.04  | 1.10 ± 0.07  |

| Supplemental Table 4 (continued) |             |             |    |              |              |             |             |    |              |              |
|----------------------------------|-------------|-------------|----|--------------|--------------|-------------|-------------|----|--------------|--------------|
| <i>igfbp3</i>                    | 0.73 ± 0.06 | 1.37 ± 0.23 |    | 0.67 ± 0.09  | 1.51 ± 0.32  | 1.25 ± 0.13 | 1.75 ± 0.28 | *  | 0.80 ± 0.14  | 0.90 ± 0.12  |
| <i>il10</i>                      | 1.21 ± 0.10 | 1.21 ± 0.07 | *  | 1.07 ± 0.13  | 0.86 ± 0.07  | 0.83 ± 0.08 | 0.83 ± 0.05 | *  | 1.16 ± 0.14  | 1.12 ± 0.11  |
| <i>il18</i>                      | 1.20 ± 0.02 | 1.21 ± 0.02 | *  | 1.31 ± 0.04  | 1.47 ± 0.04  | 0.78 ± 0.02 | 0.74 ± 0.01 | *  | 0.74 ± 0.02  | 0.69 ± 0.01  |
| <i>inha</i>                      | 0.99 ± 0.03 | 1.00 ± 0.02 |    | 0.98 ± 0.02  | 0.96 ± 0.05  | 0.91 ± 0.04 | 1.15 ± 0.04 |    | 0.97 ± 0.04  | 1.12 ± 0.05  |
| <i>ins2</i>                      | 0.98 ± 0.05 | 1.06 ± 0.02 |    | 0.93 ± 0.06  | 1.08 ± 0.04  | 1.01 ± 0.03 | 0.94 ± 0.03 |    | 1.01 ± 0.06  | 1.03 ± 0.04  |
| <i>jak2</i>                      | 0.98 ± 0.02 | 0.91 ± 0.03 | *  | 0.94 ± 0.05  | 0.83 ± 0.04  | 1.10 ± 0.05 | 1.05 ± 0.04 |    | 1.14 ± 0.03  | 1.07 ± 0.05  |
| <i>lcn2</i>                      | 1.32 ± 0.37 | 1.23 ± 0.24 |    | 0.83 ± 0.19  | 0.83 ± 0.18  | 0.60 ± 0.19 | 1.32 ± 0.46 |    | 0.99 ± 0.13  | 0.91 ± 0.17  |
| <i>lgals7</i>                    | 1.13 ± 0.17 | 1.11 ± 0.14 | *  | 0.90 ± 0.06  | 0.84 ± 0.05  | 0.94 ± 0.07 | 1.09 ± 0.10 |    | 1.11 ± 0.08  | 1.04 ± 0.09  |
| <i>loc170824</i>                 | 0.94 ± 0.04 | 0.93 ± 0.04 | *  | 1.11 ± 0.05  | 0.99 ± 0.08  | 0.87 ± 0.03 | 1.01 ± 0.06 | *  | 0.99 ± 0.09  | 1.19 ± 0.01  |
| <i>loc246143</i>                 | 0.97 ± 0.02 | 0.97 ± 0.02 |    | 0.97 ± 0.02  | 0.92 ± 0.04  | 1.01 ± 0.03 | 1.10 ± 0.03 |    | 1.06 ± 0.03  | 1.10 ± 0.01  |
| <i>loc292624</i>                 | 1.10 ± 0.04 | 1.06 ± 0.03 |    | 1.06 ± 0.03  | 1.14 ± 0.03  | 0.91 ± 0.03 | 0.89 ± 0.04 |    | 0.95 ± 0.03  | 0.86 ± 0.03  |
| <i>loc64171</i>                  | 0.87 ± 0.01 | 0.87 ± 0.03 |    | 0.86 ± 0.05  | 0.90 ± 0.02  | 1.14 ± 0.04 | 1.23 ± 0.05 |    | 1.23 ± 0.03  | 1.19 ± 0.02  |
| <i>madd</i>                      | 1.03 ± 0.04 | 1.04 ± 0.04 |    | 1.01 ± 0.04  | 1.10 ± 0.04  | 0.92 ± 0.04 | 1.07 ± 0.04 |    | 0.94 ± 0.03  | 0.97 ± 0.05  |
| <i>map3k6</i>                    | 0.50 ± 0.01 | 0.43 ± 0.01 | *  | 0.55 ± 0.01  | 0.46 ± 0.01  | 1.60 ± 0.03 | 1.52 ± 0.04 | *  | 1.79 ± 0.03  | 1.72 ± 0.03  |
| <i>mapk8ip</i>                   | 0.95 ± 0.04 | 0.94 ± 0.05 |    | 0.90 ± 0.04  | 1.03 ± 0.04  | 0.99 ± 0.03 | 1.14 ± 0.05 |    | 1.02 ± 0.04  | 1.24 ± 0.05  |
| <i>mc1l</i>                      | 0.83 ± 0.04 | 0.77 ± 0.02 | *  | 0.88 ± 0.03  | 0.84 ± 0.03  | 1.33 ± 0.06 | 1.28 ± 0.04 | *  | 1.46 ± 0.01  | 1.35 ± 0.03  |
| <i>mitf</i>                      | 1.05 ± 0.17 | 1.20 ± 0.37 | *  | 0.56 ± 0.11  | 0.62 ± 0.05  | 1.05 ± 0.13 | 1.05 ± 0.12 | †  | 1.38 ± 0.07† | 0.87 ± 0.15  |
| <i>mlh1</i>                      | 1.10 ± 0.09 | 1.09 ± 0.06 |    | 1.16 ± 0.06  | 1.10 ± 0.05  | 1.01 ± 0.02 | 0.74 ± 0.02 | †  | 0.94 ± 0.08  | 0.93 ± 0.05† |
| <i>moap1</i>                     | 1.00 ± 0.02 | 1.08 ± 0.03 |    | 0.96 ± 0.03  | 1.06 ± 0.01  | 0.94 ± 0.01 | 1.03 ± 0.01 | *† | 0.94 ± 0.02  | 0.98 ± 0.01† |
| <i>myc</i>                       | 1.39 ± 0.15 | 0.97 ± 0.03 |    | 1.45 ± 0.12  | 0.94 ± 0.03  | 1.31 ± 0.11 | 0.44 ± 0.01 | †  | 1.09 ± 0.09  | 0.61 ± 0.03† |
| <i>mycs</i>                      | 1.02 ± 0.01 | 1.02 ± 0.03 | *  | 1.05 ± 0.03  | 1.12 ± 0.01  | 0.89 ± 0.06 | 0.94 ± 0.05 |    | 0.95 ± 0.01  | 0.93 ± 0.04  |
| <i>nalp1</i>                     | 0.98 ± 0.03 | 0.99 ± 0.05 |    | 0.98 ± 0.01  | 0.99 ± 0.02  | 0.99 ± 0.03 | 0.93 ± 0.04 | *† | 1.01 ± 0.03  | 1.07 ± 0.02† |
| <i>nalp10</i>                    | 1.91 ± 0.40 | 0.90 ± 0.13 |    | 1.81 ± 0.38  | 0.93 ± 0.08  | 1.11 ± 0.18 | 1.05 ± 0.10 |    | 0.88 ± 0.14  | 1.11 ± 0.27  |
| <i>nalp14</i>                    | 1.10 ± 0.07 | 1.00 ± 0.13 |    | 1.07 ± 0.11  | 1.02 ± 0.19  | 1.18 ± 0.15 | 0.94 ± 0.12 |    | 1.06 ± 0.09  | 1.03 ± 0.12  |
| <i>nfkbl</i>                     | 0.99 ± 0.02 | 1.02 ± 0.02 |    | 1.01 ± 0.04  | 1.03 ± 0.02  | 0.99 ± 0.05 | 0.98 ± 0.02 |    | 1.00 ± 0.03  | 0.97 ± 0.02  |
| <i>ngfr</i>                      | 0.70 ± 0.02 | 0.71 ± 0.01 |    | 0.70 ± 0.01  | 0.73 ± 0.01  | 1.36 ± 0.04 | 1.71 ± 0.05 |    | 1.36 ± 0.05  | 1.68 ± 0.05  |
| <i>ngfrap1</i>                   | 0.79 ± 0.01 | 0.78 ± 0.01 | *† | 0.80 ± 0.01  | 0.83 ± 0.02† | 1.16 ± 0.01 | 1.49 ± 0.03 | *  | 1.20 ± 0.01  | 1.54 ± 0.03  |
| <i>nol3</i>                      | 0.97 ± 0.01 | 0.89 ± 0.02 |    | 0.97 ± 0.01  | 0.94 ± 0.01  | 1.01 ± 0.01 | 1.03 ± 0.01 | *  | 1.06 ± 0.01  | 1.08 ± 0.01  |
| <i>notch1</i>                    | 0.94 ± 0.12 | 1.33 ± 0.09 | †  | 1.34 ± 0.26  | 1.05 ± 0.08  | 0.90 ± 0.07 | 1.08 ± 0.16 |    | 0.84 ± 0.07  | 0.91 ± 0.05  |
| <i>notch2</i>                    | 1.05 ± 0.09 | 1.06 ± 0.06 | *  | 0.95 ± 0.04  | 0.96 ± 0.03  | 1.20 ± 0.09 | 1.04 ± 0.08 |    | 1.04 ± 0.03  | 0.97 ± 0.07  |
| <i>nsmaf</i>                     | 1.27 ± 0.13 | 1.12 ± 0.03 | *  | 0.97 ± 0.06  | 0.98 ± 0.10  | 1.15 ± 0.10 | 0.90 ± 0.05 | *  | 0.94 ± 0.05  | 0.84 ± 0.05  |
| <i>ntn1</i>                      | 1.19 ± 0.26 | 1.23 ± 0.13 | *  | 0.81 ± 0.04  | 0.84 ± 0.04  | 1.13 ± 0.18 | 1.15 ± 0.12 |    | 1.27 ± 0.19  | 1.05 ± 0.09  |
| <i>p2rx1</i>                     | 0.95 ± 0.18 | 1.11 ± 0.17 |    | 0.77 ± 0.11  | 1.43 ± 0.20  | 0.81 ± 0.08 | 1.40 ± 0.16 | †  | 1.77 ± 0.19† | 0.90 ± 0.10† |
| <i>pawr</i>                      | 0.80 ± 0.20 | 0.86 ± 0.06 |    | 1.11 ± 0.29  | 1.07 ± 0.17  | 1.45 ± 0.10 | 0.70 ± 0.12 | †  | 1.03 ± 0.11† | 1.08 ± 0.11† |
| <i>pdcd2</i>                     | 0.95 ± 0.01 | 0.96 ± 0.03 |    | 0.96 ± 0.02  | 0.96 ± 0.01  | 1.06 ± 0.02 | 1.05 ± 0.01 |    | 1.08 ± 0.04  | 1.02 ± 0.03  |
| <i>pdcd5</i>                     | 0.97 ± 0.04 | 0.96 ± 0.03 |    | 0.99 ± 0.04  | 0.96 ± 0.03  | 0.97 ± 0.03 | 1.03 ± 0.03 |    | 0.94 ± 0.03  | 1.03 ± 0.03  |
| <i>pdcd6ip</i>                   | 0.73 ± 0.01 | 0.72 ± 0.01 | *  | 0.80 ± 0.02  | 0.73 ± 0.02  | 1.28 ± 0.02 | 1.21 ± 0.03 | *  | 1.31 ± 0.05  | 1.33 ± 0.02  |
| <i>pdcd8</i>                     | 1.01 ± 0.01 | 0.97 ± 0.02 | *  | 1.05 ± 0.02  | 1.00 ± 0.01  | 0.98 ± 0.02 | 1.01 ± 0.03 | †  | 0.97 ± 0.01  | 1.09 ± 0.02† |
| <i>perp</i>                      | 0.89 ± 0.08 | 1.33 ± 0.35 |    | 1.06 ± 0.15  | 1.00 ± 0.28  | 0.79 ± 0.10 | 1.16 ± 0.10 |    | 1.01 ± 0.16  | 1.04 ± 0.12  |
| <i>pglyrp1</i>                   | 0.99 ± 0.03 | 1.01 ± 0.02 |    | 1.01 ± 0.01  | 1.01 ± 0.02  | 1.00 ± 0.02 | 1.02 ± 0.01 |    | 1.00 ± 0.02  | 1.00 ± 0.01  |
| <i>phlda1</i>                    | 0.93 ± 0.09 | 0.72 ± 0.07 |    | 0.94 ± 0.07  | 0.75 ± 0.06  | 0.69 ± 0.12 | 1.24 ± 0.07 | *† | 1.07 ± 0.03† | 1.17 ± 0.06  |
| <i>pik3r1</i>                    | 1.29 ± 0.08 | 0.85 ± 0.06 | †  | 1.01 ± 0.12† | 1.00 ± 0.04  | 0.82 ± 0.07 | 1.09 ± 0.07 |    | 0.83 ± 0.03  | 1.23 ± 0.05  |
| <i>plagl1</i>                    | 2.22 ± 0.37 | 0.60 ± 0.09 |    | 1.97 ± 0.29  | 0.61 ± 0.11  | 2.00 ± 0.30 | 0.47 ± 0.04 | †  | 1.14 ± 0.17† | 0.62 ± 0.04  |
| <i>polb</i>                      | 1.07 ± 0.04 | 1.09 ± 0.04 |    | 1.03 ± 0.04  | 1.01 ± 0.05  | 0.96 ± 0.02 | 0.94 ± 0.03 |    | 0.99 ± 0.05  | 0.89 ± 0.02  |
| <i>ppm1f</i>                     | 0.98 ± 0.09 | 0.96 ± 0.07 |    | 0.93 ± 0.11  | 1.00 ± 0.09  | 1.07 ± 0.06 | 0.92 ± 0.09 |    | 1.11 ± 0.06  | 1.03 ± 0.10  |
| <i>ppplr13b</i>                  | 1.03 ± 0.09 | 1.04 ± 0.03 |    | 1.06 ± 0.06  | 1.14 ± 0.05  | 0.97 ± 0.08 | 0.96 ± 0.07 |    | 0.93 ± 0.05  | 0.90 ± 0.02  |
| <i>prdx2</i>                     | 0.99 ± 0.01 | 1.00 ± 0.01 |    | 0.97 ± 0.01  | 1.00 ± 0.01  | 0.98 ± 0.01 | 1.05 ± 0.02 |    | 0.98 ± 0.02  | 1.03 ± 0.02  |
| <i>prkaal</i>                    | 1.02 ± 0.08 | 0.85 ± 0.03 |    | 1.16 ± 0.06  | 0.88 ± 0.05  | 1.33 ± 0.18 | 1.05 ± 0.07 |    | 1.18 ± 0.13  | 1.26 ± 0.22  |
| <i>prkca</i>                     | 0.92 ± 0.05 | 1.04 ± 0.03 |    | 0.98 ± 0.04  | 1.03 ± 0.04  | 0.96 ± 0.07 | 0.94 ± 0.04 | *  | 1.10 ± 0.08  | 1.13 ± 0.03  |
| <i>prkcd</i>                     | 0.90 ± 0.01 | 0.95 ± 0.01 |    | 0.88 ± 0.01  | 0.94 ± 0.01  | 1.03 ± 0.01 | 1.23 ± 0.02 | *  | 1.06 ± 0.01  | 1.27 ± 0.02  |
| <i>prlr</i>                      | 0.84 ± 0.20 | 1.03 ± 0.22 |    | 0.87 ± 0.16  | 1.06 ± 0.19  | 0.89 ± 0.19 | 1.10 ± 0.22 |    | 1.01 ± 0.25  | 0.71 ± 0.11  |
| <i>psen1</i>                     | 1.02 ± 0.03 | 1.20 ± 0.10 | *  | 0.86 ± 0.01  | 1.00 ± 0.04  | 0.91 ± 0.03 | 1.02 ± 0.04 | *  | 1.06 ± 0.03  | 1.03 ± 0.06  |
| <i>pten</i>                      | 0.99 ± 0.06 | 0.95 ± 0.03 |    | 0.99 ± 0.08  | 0.90 ± 0.03  | 1.03 ± 0.03 | 1.05 ± 0.04 | †  | 0.97 ± 0.04  | 1.14 ± 0.05  |
| <i>ptma</i>                      | 0.95 ± 0.05 | 0.99 ± 0.05 |    | 1.00 ± 0.10  | 0.95 ± 0.04  | 0.96 ± 0.06 | 1.06 ± 0.03 |    | 0.99 ± 0.06  | 1.08 ± 0.03  |
| <i>pycard</i>                    | 1.07 ± 0.07 | 1.15 ± 0.08 |    | 1.02 ± 0.07  | 1.13 ± 0.05  | 1.03 ± 0.02 | 1.08 ± 0.06 | *  | 0.85 ± 0.05  | 0.99 ± 0.02  |
| <i>rabep1</i>                    | 0.89 ± 0.02 | 0.86 ± 0.01 | *  | 0.91 ± 0.02  | 0.90 ± 0.01  | 1.06 ± 0.01 | 1.26 ± 0.01 | *  | 1.12 ± 0.01  | 1.30 ± 0.01  |
| <i>rara</i>                      | 1.08 ± 0.05 | 1.13 ± 0.10 |    | 1.08 ± 0.05  | 1.11 ± 0.05  | 1.00 ± 0.04 | 0.99 ± 0.06 |    | 0.97 ± 0.02  | 0.97 ± 0.05  |
| <i>ripk3</i>                     | 0.85 ± 0.01 | 0.91 ± 0.01 | *  | 0.88 ± 0.01  | 0.93 ± 0.02  | 1.07 ± 0.01 | 1.10 ± 0.02 | *  | 1.11 ± 0.02  | 1.12 ± 0.01  |

|                  |             |             |   |              |              |             |             |    |              |              |
|------------------|-------------|-------------|---|--------------|--------------|-------------|-------------|----|--------------|--------------|
| <i>rock1</i>     | 0.95 ± 0.05 | 0.88 ± 0.05 |   | 0.97 ± 0.06  | 0.92 ± 0.05  | 1.09 ± 0.07 | 1.03 ± 0.04 |    | 1.06 ± 0.05  | 1.02 ± 0.05  |
| <i>rtn4</i>      | 0.83 ± 0.04 | 0.83 ± 0.03 |   | 0.82 ± 0.07  | 0.83 ± 0.04  | 1.28 ± 0.06 | 1.64 ± 0.12 | *  | 1.43 ± 0.08  | 2.06 ± 0.11  |
| <i>sl100b</i>    | 1.26 ± 0.14 | 1.15 ± 0.24 |   | 1.23 ± 0.45  | 0.96 ± 0.06  | 0.92 ± 0.03 | 0.97 ± 0.10 |    | 0.90 ± 0.13  | 0.97 ± 0.13  |
| <i>scn2a1</i>    | 0.85 ± 0.02 | 0.87 ± 0.03 |   | 0.86 ± 0.08  | 0.84 ± 0.04  | 1.38 ± 0.05 | 1.21 ± 0.08 | *† | 1.12 ± 0.02† | 1.21 ± 0.07  |
| <i>sgk</i>       | 0.92 ± 0.24 | 1.38 ± 0.22 |   | 1.23 ± 0.19  | 1.72 ± 0.50  | 0.94 ± 0.24 | 0.86 ± 0.24 |    | 0.97 ± 0.15  | 0.83 ± 0.16  |
| <i>sh3kbp1</i>   | 1.02 ± 0.10 | 1.13 ± 0.07 | * | 0.72 ± 0.13  | 0.65 ± 0.13  | 0.70 ± 0.12 | 0.65 ± 0.13 | *† | 1.10 ± 0.07† | 1.92 ± 0.15† |
| <i>sh3md2</i>    | 0.99 ± 0.18 | 1.06 ± 0.10 |   | 1.12 ± 0.16  | 1.24 ± 0.12  | 0.82 ± 0.15 | 0.95 ± 0.09 |    | 0.80 ± 0.10  | 0.84 ± 0.07  |
| <i>siah2</i>     | 0.93 ± 0.05 | 1.00 ± 0.05 | † | 1.10 ± 0.05† | 0.96 ± 0.06  | 1.04 ± 0.05 | 0.94 ± 0.07 |    | 1.02 ± 0.03  | 1.02 ± 0.06  |
| <i>sod1</i>      | 1.08 ± 0.01 | 1.06 ± 0.01 | * | 1.06 ± 0.01  | 1.01 ± 0.01  | 0.90 ± 0.01 | 0.91 ± 0.02 |    | 0.90 ± 0.02  | 0.91 ± 0.01  |
| <i>spata3</i>    | 1.07 ± 0.05 | 1.13 ± 0.10 | * | 0.95 ± 0.09  | 0.96 ± 0.08  | 0.94 ± 0.05 | 1.02 ± 0.09 |    | 1.02 ± 0.08  | 0.94 ± 0.11  |
| <i>spp1</i>      | 0.88 ± 0.21 | 1.37 ± 0.34 |   | 1.04 ± 0.38  | 1.72 ± 0.39  | 1.02 ± 0.14 | 1.30 ± 0.33 |    | 1.77 ± 0.64  | 1.09 ± 0.25  |
| <i>stambp</i>    | 0.97 ± 0.04 | 0.85 ± 0.08 |   | 0.84 ± 0.05  | 0.95 ± 0.07  | 0.96 ± 0.06 | 1.18 ± 0.03 |    | 1.04 ± 0.05  | 1.18 ± 0.07  |
| <i>stk17b</i>    | 0.99 ± 0.02 | 1.06 ± 0.04 |   | 0.96 ± 0.03  | 1.01 ± 0.04  | 1.01 ± 0.07 | 1.01 ± 0.04 |    | 1.06 ± 0.03  | 0.99 ± 0.04  |
| <i>stk3</i>      | 0.92 ± 0.03 | 0.82 ± 0.03 | * | 1.00 ± 0.03  | 0.90 ± 0.01  | 1.12 ± 0.03 | 1.04 ± 0.03 |    | 1.15 ± 0.01  | 1.04 ± 0.02  |
| <i>stnl</i>      | 1.03 ± 0.01 | 1.00 ± 0.01 | * | 1.00 ± 0.01  | 1.00 ± 0.01  | 0.84 ± 0.01 | 1.04 ± 0.02 |    | 0.83 ± 0.01  | 1.05 ± 0.02  |
| <i>tax1bp1</i>   | 1.04 ± 0.01 | 0.97 ± 0.01 |   | 1.01 ± 0.02  | 0.98 ± 0.03  | 0.96 ± 0.01 | 1.02 ± 0.01 |    | 0.99 ± 0.02  | 1.01 ± 0.02  |
| <i>tegt</i>      | 0.92 ± 0.02 | 0.92 ± 0.02 |   | 0.93 ± 0.01  | 0.93 ± 0.01  | 1.10 ± 0.03 | 1.12 ± 0.01 | *  | 1.15 ± 0.03  | 1.22 ± 0.01  |
| <i>tesk2</i>     | 1.43 ± 0.09 | 0.73 ± 0.04 |   | 1.37 ± 0.13  | 0.84 ± 0.06  | 1.48 ± 0.03 | 0.77 ± 0.07 | *† | 1.03 ± 0.03† | 0.74 ± 0.06  |
| <i>tfpt</i>      | 0.95 ± 0.09 | 0.90 ± 0.10 | † | 0.83 ± 0.04  | 1.05 ± 0.03  | 1.12 ± 0.07 | 1.09 ± 0.06 |    | 1.06 ± 0.05  | 1.19 ± 0.08  |
| <i>tgfa</i>      | 1.20 ± 0.06 | 1.16 ± 0.10 | * | 0.98 ± 0.07  | 0.96 ± 0.05  | 1.07 ± 0.08 | 0.85 ± 0.03 | †  | 0.96 ± 0.04  | 1.28 ± 0.17† |
| <i>tgf2</i>      | 0.61 ± 0.13 | 0.92 ± 0.14 |   | 0.79 ± 0.09  | 0.75 ± 0.13  | 1.15 ± 0.13 | 1.57 ± 0.10 | *  | 1.05 ± 0.19  | 0.97 ± 0.09  |
| <i>thap1</i>     | 1.03 ± 0.08 | 0.75 ± 0.04 | * | 1.15 ± 0.08  | 1.02 ± 0.17  | 1.08 ± 0.09 | 0.80 ± 0.03 | *  | 1.30 ± 0.11  | 0.93 ± 0.06  |
| <i>tieg</i>      | 0.86 ± 0.01 | 0.77 ± 0.01 | * | 0.83 ± 0.01  | 0.74 ± 0.01  | 1.42 ± 0.03 | 1.24 ± 0.05 |    | 1.45 ± 0.04  | 1.16 ± 0.04  |
| <i>timp3</i>     | 1.02 ± 0.09 | 1.03 ± 0.06 |   | 1.03 ± 0.06  | 0.98 ± 0.01  | 1.00 ± 0.08 | 0.98 ± 0.04 |    | 1.03 ± 0.07  | 0.96 ± 0.10  |
| <i>tnf</i>       | 1.11 ± 0.12 | 0.93 ± 0.13 | † | 0.75 ± 0.09† | 1.29 ± 0.10† | 0.65 ± 0.14 | 0.94 ± 0.12 | *  | 1.17 ± 0.23  | 1.07 ± 0.13  |
| <i>tnfrsf11b</i> | 1.03 ± 0.11 | 1.08 ± 0.16 |   | 0.88 ± 0.22  | 1.19 ± 0.08  | 1.11 ± 0.28 | 0.89 ± 0.18 |    | 0.70 ± 0.11  | 1.00 ± 0.17  |
| <i>tnfrsf1a</i>  | 0.75 ± 0.01 | 0.78 ± 0.01 | * | 0.79 ± 0.02  | 0.83 ± 0.02  | 1.25 ± 0.03 | 1.21 ± 0.03 |    | 1.29 ± 0.02  | 1.22 ± 0.01  |
| <i>tnfrsf6</i>   | 1.02 ± 0.30 | 2.15 ± 0.90 |   | 0.68 ± 0.09  | 0.99 ± 0.19  | 0.89 ± 0.16 | 1.75 ± 0.33 |    | 0.95 ± 0.22  | 1.16 ± 0.22  |
| <i>tnfsf10</i>   | 0.89 ± 0.24 | 1.20 ± 0.17 |   | 0.64 ± 0.20  | 0.93 ± 0.22  | 0.69 ± 0.16 | 1.05 ± 0.24 |    | 1.19 ± 0.16  | 1.00 ± 0.19  |
| <i>tp53</i>      | 1.38 ± 0.16 | 1.41 ± 0.19 | * | 1.04 ± 0.06  | 1.10 ± 0.08  | 0.95 ± 0.10 | 0.90 ± 0.11 |    | 0.93 ± 0.03  | 0.69 ± 0.04  |
| <i>tpt1</i>      | 0.97 ± 0.02 | 0.96 ± 0.02 |   | 0.99 ± 0.01  | 0.98 ± 0.01  | 1.12 ± 0.03 | 1.03 ± 0.01 |    | 1.10 ± 0.02  | 1.03 ± 0.03  |
| <i>tradd</i>     | 1.05 ± 0.01 | 0.99 ± 0.04 |   | 1.06 ± 0.03  | 0.99 ± 0.02  | 0.97 ± 0.01 | 0.98 ± 0.01 |    | 0.95 ± 0.02  | 1.00 ± 0.02  |
| <i>trib3</i>     | 0.98 ± 0.01 | 1.06 ± 0.01 | * | 1.08 ± 0.01  | 1.14 ± 0.02  | 0.72 ± 0.01 | 0.98 ± 0.03 | *  | 0.78 ± 0.01  | 1.01 ± 0.01  |
| <i>trp63</i>     | 1.07 ± 0.17 | 1.11 ± 0.20 |   | 0.88 ± 0.14  | 0.92 ± 0.13  | 1.12 ± 0.18 | 0.96 ± 0.05 |    | 1.00 ± 0.05  | 0.90 ± 0.12  |
| <i>tsargl</i>    | 0.62 ± 0.11 | 0.90 ± 0.11 |   | 0.96 ± 0.08  | 1.26 ± 0.34  | 1.25 ± 0.15 | 0.97 ± 0.12 |    | 1.33 ± 0.06  | 1.07 ± 0.07  |
| <i>twist2</i>    | 0.95 ± 0.02 | 1.00 ± 0.04 | * | 0.99 ± 0.04  | 1.16 ± 0.10  | 0.81 ± 0.05 | 1.10 ± 0.06 | †  | 1.03 ± 0.05† | 1.03 ± 0.04  |
| <i>txnl1</i>     | 0.91 ± 0.02 | 0.90 ± 0.01 |   | 0.93 ± 0.01  | 0.91 ± 0.01  | 1.08 ± 0.01 | 1.11 ± 0.02 |    | 1.09 ± 0.02  | 1.14 ± 0.02  |
| <i>ubelc</i>     | 0.99 ± 0.04 | 0.94 ± 0.02 |   | 1.00 ± 0.02  | 0.99 ± 0.03  | 1.09 ± 0.04 | 1.02 ± 0.03 |    | 1.09 ± 0.04  | 0.97 ± 0.03  |
| <i>unc5a</i>     | 0.82 ± 0.03 | 1.17 ± 0.07 | † | 1.09 ± 0.07† | 0.97 ± 0.04† | 0.76 ± 0.09 | 0.98 ± 0.07 | *† | 1.07 ± 0.04† | 1.01 ± 0.04  |
| <i>unc5b</i>     | 0.83 ± 0.03 | 0.89 ± 0.01 |   | 0.84 ± 0.04  | 0.96 ± 0.02  | 1.01 ± 0.04 | 1.37 ± 0.06 | *  | 1.25 ± 0.04  | 1.55 ± 0.02  |
| <i>v1rd22</i>    | 0.95 ± 0.03 | 1.02 ± 0.04 |   | 1.02 ± 0.06  | 1.08 ± 0.07  | 0.98 ± 0.08 | 0.97 ± 0.05 |    | 1.02 ± 0.05  | 0.97 ± 0.03  |
| <i>vdr</i>       | 1.36 ± 0.19 | 1.16 ± 0.19 | * | 0.89 ± 0.11  | 0.87 ± 0.07  | 1.01 ± 0.16 | 1.47 ± 0.25 | *  | 0.87 ± 0.04  | 0.91 ± 0.15  |
| <i>vegf</i>      | 1.34 ± 0.13 | 1.38 ± 0.08 |   | 1.25 ± 0.15  | 1.20 ± 0.04  | 0.57 ± 0.02 | 0.71 ± 0.06 |    | 0.57 ± 0.04  | 0.71 ± 0.09  |
| <i>wig1</i>      | 0.94 ± 0.01 | 1.00 ± 0.01 | * | 0.98 ± 0.03  | 1.08 ± 0.02  | 0.80 ± 0.02 | 1.16 ± 0.01 |    | 0.78 ± 0.02  | 1.21 ± 0.02  |
| <i>ywhah</i>     | 0.93 ± 0.01 | 0.85 ± 0.01 | † | 0.90 ± 0.01  | 0.91 ± 0.01† | 1.13 ± 0.02 | 1.41 ± 0.03 |    | 1.15 ± 0.02  | 1.31 ± 0.05  |
| <i>zd10b</i>     | 0.94 ± 0.03 | 0.98 ± 0.05 |   | 0.93 ± 0.04  | 0.94 ± 0.02  | 1.10 ± 0.04 | 1.02 ± 0.03 | †  | 1.22 ± 0.03† | 1.01 ± 0.03  |
| <i>zfp162</i>    | 0.95 ± 0.08 | 0.89 ± 0.06 |   | 0.96 ± 0.10  | 0.99 ± 0.09  | 1.06 ± 0.11 | 1.04 ± 0.08 |    | 0.97 ± 0.09  | 1.06 ± 0.03  |

Normalized expression ratios are given as mean ± SE obtained from five independent cultures in each group, with the sample from each culture run on a separate array. Several of the values reported in this table have appeared in previous studies of other gene groupings [1,3-7,9,10].

\*Significant main treatment effect in two-factor ANOVA (treatment, time).

†Interaction of treatment × time; then, † denotes significant treatment effect for a given time point

Global statistical analysis of Table 4: ANOVA factors of treatment, differentiation state, gene, time<sup>§</sup>

Treatment × gene, p < 0.0001; treatment × gene × state, p < 0.0001; treatment × gene × time, p < 0.02; treatment × gene × state × time, p < 0.0001

Undifferentiated: treatment × gene, p < 0.0001

Differentiating: treatment × gene, p < 0.0001; treatment × gene × time, p < 0.0001

<sup>§</sup>results shown include only treatment effects and interactions of treatment with other variables

**REFERENCES**

- [1] T.A. Slotkin, D. Lobner, F.J. Seidler, Transcriptional profiles for glutamate transporters reveal differences between organophosphates but similarities with unrelated neurotoxicants. *Brain Res. Bull.* 83 (2010) 76-83.
- [2] T.A. Slotkin, F.J. Seidler, Comparative developmental neurotoxicity of organophosphates in vivo: transcriptional responses of pathways for brain cell development, cell signaling, cytotoxicity and neurotransmitter systems. *Brain Res. Bull.* 72 (2007) 232-274.
- [3] T.A. Slotkin, F.J. Seidler, Oxidative and excitatory mechanisms of developmental neurotoxicity: transcriptional profiles for chlorpyrifos, diazinon, dieldrin and divalent nickel in PC12 cells. *Environ. Health Perspect.* 117 (2009) 587-596.
- [4] T.A. Slotkin, F.J. Seidler, Protein kinase C is a target for diverse developmental neurotoxicants: transcriptional responses to chlorpyrifos, diazinon, dieldrin and divalent nickel in PC12 cells. *Brain Res.* 1263 (2009) 23-32.
- [5] T.A. Slotkin, F.J. Seidler, Transcriptional profiles reveal similarities and differences in the effects of developmental neurotoxicants on differentiation into neurotransmitter phenotypes in PC12 cells. *Brain Res. Bull.* 78 (2009) 211-225.
- [6] T.A. Slotkin, F.J. Seidler, Diverse neurotoxicants converge on gene expression for neuropeptides and their receptors in an in vitro model of neurodifferentiation: effects of chlorpyrifos, diazinon, dieldrin and divalent nickel in PC12 cells. *Brain Res.* 1353 (2010) 36-52.
- [7] T.A. Slotkin, F.J. Seidler, Developmental exposure to organophosphates triggers transcriptional changes in genes associated with Parkinson's Disease in vitro and in vivo. *Brain Res. Bull.* (2011) submitted.
- [8] T.A. Slotkin, F.J. Seidler, F. Fumagalli, Exposure to organophosphates reduces the expression of neurotrophic factors in neonatal rat brain regions: similarities and differences in the effects of chlorpyrifos and diazinon on the fibroblast growth factor superfamily. *Environ. Health Perspect.* 115 (2007) 909-916.
- [9] T.A. Slotkin, F.J. Seidler, F. Fumagalli, Targeting of neurotrophic factors, their receptors, and signaling pathways in the developmental neurotoxicity of organophosphates in vivo and in vitro. *Brain Res. Bull.* 76 (2008) 424-438.
- [10] T.A. Slotkin, F.J. Seidler, F. Fumagalli, Unrelated developmental neurotoxicants elicit similar transcriptional profiles for effects on neurotrophic factors and their receptors in an in vitro model. *Neurotoxicol. Teratol.* 32 (2010) 42-51.
